# Supplementary material
Source: PubMed Central journal article supplement (PMC2974010)
Supplement: NIHMS247031-supplement-1_si_001.pdf [file NIHMS247031-supplement-1_si_001.pdf]

# Synthesis of Amino Acid-Derived Enaminones via Wolff Rearrangement Using Vinylogous Amides as Carbon Nucleophiles

Hajime Seki and Gunda I. Georg\*

Department of Chemistry and Department of Medicinal Chemistry, Institute for Therapeutics Discovery and Development, College of Pharmacy, University of Minnesota, 717 Delaware Street SE, Minneapolis, Minnesota 55414

## Supporting information

|                                                                                                                                                               |     |
|---------------------------------------------------------------------------------------------------------------------------------------------------------------|-----|
| <b>1. General methods</b>                                                                                                                                     | S1  |
| <b>2. General procedure for the preparation of diazoketones</b>                                                                                               | S2  |
| ( <i>E</i> )-Ethyl 3-(Benzyl(3-diazo-2-oxopropyl)amino)acrylate ( <b>1</b> )                                                                                  | S2  |
| Diethyl 2-(Benzyl(3-diazo-2-oxopropyl)amino)but-2-enedioate ( <b>3</b> )                                                                                      | S3  |
| ( <i>E</i> )-3-(Benzyl(3-diazo-2-oxopropyl)amino)-1-phenylprop-2-en-1-one ( <b>5</b> )                                                                        | S3  |
| ( <i>E</i> )-4-(Benzyl(3-diazo-2-oxopropyl)amino)but-3-en-2-one ( <b>7</b> )                                                                                  | S3  |
| ( <i>E</i> )-Ethyl 3-((4-Diazo-3-oxobutan-2-yl)(methyl)amino)acrylate ( <b>9</b> )                                                                            | S4  |
| ( <i>S,E</i> )-Ethyl 3-((1-Diazo-5-methyl-2-oxohexan-3-yl)(methyl)amino)acrylate ( <b>11</b> )                                                                | S4  |
| ( <i>R,E</i> )-Ethyl 3-(2-(2-Diazoacetyl)piperidin-1-yl)acrylate ( <b>13</b> )                                                                                | S4  |
| ( <i>S,E</i> )-Ethyl 3-(2-(2-Diazoacetyl)pyrrolidin-1-yl)acrylate ( <b>15</b> )                                                                               | S5  |
| ( <i>E</i> )-Ethyl 3-((2 <i>S</i> ,4 <i>R</i> )-4-( <i>tert</i> -Butyldimethylsilyloxy)-2-(2-diazoacetyl)pyrrolidin-1-yl)acrylate ( <b>17</b> )               | S5  |
| ( <i>E</i> )-Ethyl 3-(3-(2-Diazoacetyl)-3,4-dihydroisoquinolin-2(1 <i>H</i> )-yl)acrylate ( <b>19</b> )                                                       | S5  |
| <b>3. General procedure for cyclization via Wolff rearrangement</b>                                                                                           | S5  |
| Ethyl 1-Benzyl-4-oxo-1,4,5,6-tetrahydropyridine-3-carboxylate ( <b>2</b> )                                                                                    | S6  |
| Diethyl 1-Benzyl-4-oxo-1,4,5,6-tetrahydropyridine-2,3-dicarboxylate ( <b>4</b> )                                                                              | S6  |
| 5-Benzoyl-1-benzyl-2,3-dihydropyridin-4(1 <i>H</i> )-one ( <b>6</b> )                                                                                         | S6  |
| 5-Acetyl-1-benzyl-2,3-dihydropyridin-4(1 <i>H</i> )-one ( <b>8</b> )                                                                                          | S6  |
| ( <i>S</i> )-Ethyl 1,6-Dimethyl-4-oxo-1,4,5,6-tetrahydropyridine-3-carboxylate ( <b>10</b> )                                                                  | S7  |
| ( <i>S</i> )-Ethyl 6-Isobutyl-1-methyl-4-oxo-1,4,5,6-tetrahydropyridine-3-carboxylate ( <b>12</b> )                                                           | S7  |
| ( <i>R</i> )-Ethyl 2-Oxo-2,6,7,8,9,9a-hexahydro-1 <i>H</i> -quinolizine-3-carboxylate ( <b>14</b> )                                                           | S7  |
| ( <i>S</i> )-Ethyl 7-Oxo-1,2,3,7,8,8a-hexahydroindolizine-6-carboxylate ( <b>16</b> )                                                                         | S8  |
| (2 <i>R</i> ,8 <i>aS</i> )-Ethyl 2-( <i>tert</i> -Butyldimethylsilyloxy)-7-oxo-1,2,3,7,8,8a-hexahydroindolizine-6-carboxylate ( <b>18</b> )                   | S8  |
| Ethyl 2-Oxo-2,6,11,11a-tetrahydro-1 <i>H</i> -pyrido[1,2- <i>b</i> ]isoquinoline-3-carboxylate ( <b>20</b> )                                                  | S8  |
| <b>4. Determination of ee by derivatization using Mosher's acid</b>                                                                                           | S9  |
| ( <i>S</i> )-Ethyl 6-Isobutyl-1-methyl-4-(( <i>S</i> )-3,3,3-trifluoro-2-methoxy-2-phenylpropanoyloxy)-1,2,5,6-tetrahydropyridine-3-carboxylate ( <b>21</b> ) | S9  |
| ( <i>R</i> )-Ethyl 2-(( <i>S</i> )-3,3,3-Trifluoro-2-methoxy-2-phenylpropanoyloxy)-4,6,7,8,9,9a-hexahydro-1 <i>H</i> -quinolizine-3-carboxylate ( <b>22</b> ) | S10 |
| ( <i>S</i> )-Ethyl 7-(( <i>S</i> )-3,3,3-Trifluoro-2-methoxy-2-phenylpropanoyloxy)-1,2,3,5,8,8a-hexahydroindolizine-6-carboxylate ( <b>23</b> )               | S10 |
| <b>5. References and notes</b>                                                                                                                                | S11 |
| <b>6. Spectra</b>                                                                                                                                             | S12 |

## 1. General methods

Unless specified, all reactions were performed under a nitrogen atmosphere in oven-dried glassware. Dry THF and CH<sub>2</sub>Cl<sub>2</sub> were dried before use over an activated alumina column. All reagents were used as received. The methods for analysis are as following.

- 1) TLC analysis was conducted on silica gel 250 μm plates). All diazo ketones and enaminone products were UV-active. Diazoketones and enaminones were also detectible with ninhydrine and KMnO<sub>4</sub>, respectively.
- 2) NMR data were recorded using a 400 MHz spectrometer. Chemical shifts are shown as ppm values relative to internal CHCl<sub>3</sub> (δ 7.26 for <sup>1</sup>H, δ 77.0 for <sup>13</sup>C).
- 3) Melting points are uncorrected.
- 4) Optical rotation was measured at 22 °C.

## 2. General procedure for the preparation of diazoketones

Preparation of substrates was carried out employing 2.0 mmol of amino acids.<sup>1</sup> Generally diazoketones were synthesized from amino acids in one-flask.<sup>2</sup>

**Warning:** Diazomethane was used for the following transformation. Even in a small scale, proper care should be taken when handling this highly explosive reagent. All glassware used was free of cracks, scratches or ground-glass joints and a blast shield was used.

### Procedure to synthesize diazoketones:

To a solution of the amino acid and NaOMe (1.0 equiv.) in MeOH (0.33 M), alkyne (1.0 equiv.) was added at 0 °C.<sup>3</sup> The consumption of alkyne was confirmed generally within 20 min. The solvent was evaporated under reduced pressure, affording the acid salt as a slightly yellow solid. The acid salt was re-dissolved in THF (0.2 M) at 0 °C, and ClCOO*i*-Bu (1.0 equiv.) was added. After 30 min, freshly distilled diazomethane (3 equiv), prepared from DIAZALD and KOH in Et<sub>2</sub>O was carefully transferred into the solution at once. The reaction mixture was allowed to warm to room temperature, stirred overnight in the dark. The reaction was quenched with aq. AcOH (10 wt%, 1 mL) at 0 °C, followed by addition of water and EtOAc. The partitioned organic layer was washed with aq. 10 wt% H<sub>3</sub>PO<sub>4</sub>, sat. aq. NaHCO<sub>3</sub> and brine, and dried over MgSO<sub>4</sub>. The filtered organic phase was concentrated *in vacuo*, and subjected to silica gel column chromatography (EtOAc/hexanes), furnishing the diazoketone.

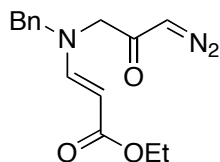

**(E)-Ethyl 3-(Benzyl(3-diazo-2-oxopropyl)amino)acrylate (1):** yellow solid (55% yield); mp: 113.5-113.9 °C; <sup>1</sup>H NMR (400 MHz, CDCl<sub>3</sub>) δ: 1.25 (t, *J* = 7.2 Hz, 3H), 3.75 (s, 2H), 4.14 (q, *J* = 7.2 Hz, 2H), 4.42 (s, 2H), 4.72 (d, *J* = 13.1 Hz, 1H), 5.31 (s, 1H), 7.17-7.22 (m, 2H), 7.28-7.38 (m, 3H), 7.63 (d, *J* = 13.1 Hz, 1H); <sup>13</sup>C NMR (400 MHz, CDCl<sub>3</sub>) δ: 14.5, 53.8, 56.1 (determined by HMQC), 59.3, 59.5 (determined by HMQC), 87.8, 127.8, 128.3, 129.0, 135.3, 151.7, 169.1, 190.1; IR (neat, cm<sup>-1</sup>): 1144, 1370, 1612, 1685, 2109; HRMS (ESI) calcd for C<sub>15</sub>H<sub>18</sub>N<sub>3</sub>O<sub>3</sub> (M + H)<sup>+</sup> 288.1348, found 288.1353.

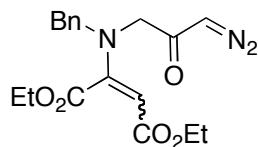

**Diethyl 2-(Benzyl(3-diazo-2-oxopropyl)amino)but-2-enedioate (3):** yellow solid (53% yield); mp: 78.1-79.9 °C; single isomer by NMR, stereochemistry not determined. <sup>1</sup>H NMR (400 MHz, CDCl<sub>3</sub>) δ: 1.24 (t, *J* = 7.1 Hz, 3H), 1.34 (t, *J* = 7.2 Hz, 3H), 3.75 (s, 2H), 4.09 (q, *J* = 7.1 Hz, 2H), 4.37-4.44 (m, 4H), 4.75 (s, 1H), 5.49 (s, 1H), 7.23-7.28 (m, 2H), 7.28-7.39 (m, 3H); <sup>13</sup>C NMR (400 MHz, CDCl<sub>3</sub>) δ: 13.8, 14.3, 54.0, 55.3, 56.1, 59.7, 62.5, 88.0, 127.8, 128.3, 129.0, 134.7, 153.9, 165.3, 167.0, 190.0; IR (neat, cm<sup>-1</sup>): 1148, 1376, 1579, 1646, 1694, 1735, 2110; HRMS (ESI) calcd for C<sub>18</sub>H<sub>22</sub>N<sub>3</sub>O<sub>5</sub> (M + H)<sup>+</sup> 360.1559, found 360.1566.

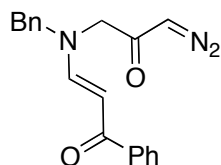

**(E)-3-(Benzyl(3-diazo-2-oxopropyl)amino)-1-phenylprop-2-en-1-one (5):** yellow oil (46% yield); <sup>1</sup>H NMR (400 MHz, CDCl<sub>3</sub>) δ: 3.89 (s, 2H), 4.55 (s, 2H), 5.34 (s, 1H), 5.70-6.20 (bs, 1H), 7.21-7.27 (m, 2H), 7.31-7.51 (m, 6H), 7.87 (d, *J* = 7.2 Hz, 2H), 7.91-8.12 (bs, 1H); <sup>13</sup>C NMR (400 MHz, CDCl<sub>3</sub>) δ: 54.0, 55.2, 61.1, 94.4, 127.6, 127.9, 128.2, 128.4, 129.0, 131.4, 134.9, 139.7, 153.2, 189.2, 189.5; IR (neat, cm<sup>-1</sup>): 1200, 1368, 1548, 1581, 1644, 2109; HRMS (ESI) calcd for C<sub>19</sub>H<sub>18</sub>N<sub>3</sub>O<sub>2</sub> (M + H)<sup>+</sup> 320.1399, found 320.1393.

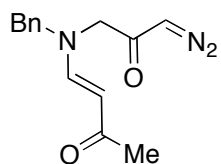

**(E)-4-(Benzyl(3-diazo-2-oxopropyl)amino)but-3-en-2-one (7):** yellow oil (33% yield); <sup>1</sup>H NMR (400 MHz, CDCl<sub>3</sub>) δ: 2.10 (s, 3H), 3.77 (s, 2H), 4.44 (s, 2H), 5.20 (bs, 1H), 5.30 (s, 1H), 7.16-7.21 (d, *J* = 7.2 Hz, 2H), 7.27-7.38 (m, 3H), 7.63 (d, *J* = 12.1 Hz, 1H); <sup>13</sup>C NMR (400 MHz, CDCl<sub>3</sub>) δ: 28.5, 53.8, 54.9, 60.6, 98.9, 127.8, 128.3, 129.0, 135.0, 151.5, 189.4, 195.9; IR (neat, cm<sup>-1</sup>): 1265, 1363, 1563, 1607, 1652, 2108; HRMS (ESI) calcd for C<sub>14</sub>H<sub>16</sub>N<sub>3</sub>O<sub>2</sub> (M + H)<sup>+</sup> 258.1243, found 258.1240.

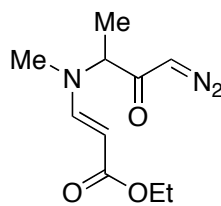

**(E)-Ethyl 3-((4-Diazo-3-oxobutan-2-yl)(methyl)amino)acrylate (9):** yellow oil (31% yield);  $^1\text{H}$  NMR (400 MHz,  $\text{CDCl}_3$ )  $\delta$ : 1.23 (t,  $J = 7.1$  Hz, 3H), 1.38 (d,  $J = 7.1$  Hz, 3H), 2.70 (s, 3H), 3.90 (bd,  $J = 6.7$  Hz, 1H), 4.10 (q,  $J = 7.1$  Hz, 2H), 4.67 (d,  $J = 13.0$  Hz, 1H), 5.35 (s, 1H), 7.46 (d,  $J = 13.0$  Hz, 1H);  $^{13}\text{C}$  NMR (400 MHz,  $\text{CDCl}_3$ )  $\delta$ : 14.4, 14.5, 33.5, 53.8, 59.1, 66.7, 87.2, 151.0, 169.1, 192.8; IR (neat,  $\text{cm}^{-1}$ ): 1052, 1095, 1155, 1224, 1349, 1610, 1686, 2109, 2981; HRMS (ESI) calcd for  $\text{C}_{10}\text{H}_{16}\text{N}_3\text{O}_3$  ( $\text{M} + \text{H}$ ) $^+$  226.1192, found 226.1182.

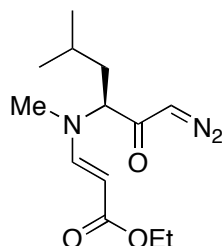

**(S,E)-Ethyl 3-((1-Diazo-5-methyl-2-oxohexan-3-yl)(methyl)amino)acrylate (11):** yellow oil (45% yield);  $^1\text{H}$  NMR (400 MHz,  $\text{CDCl}_3$ )  $\delta$ : 0.88 (d,  $J = 6.5$  Hz, 3H), 0.93 (d,  $J = 6.6$  Hz, 3H), 1.25 (t,  $J = 7.1$  Hz, 3H), 1.43-1.57 (m, 1H), 1.61-1.77 (m, 2H), 2.70 (s, 3H), 3.79 (bs, 1H), 4.12 (q,  $J = 7.1$  Hz, 2H), 4.68 (d,  $J = 13.0$  Hz, 1H), 5.32 (s, 1H), 7.47 (d,  $J = 13.0$  Hz, 1H);  $^{13}\text{C}$  NMR (400 MHz,  $\text{CDCl}_3$ )  $\delta$ : 14.5, 21.4, 23.1, 24.4, 32.9, 36.8, 54.1, 59.1, 70.2, 86.9, 151.6, 169.2, 192.6; IR (neat,  $\text{cm}^{-1}$ ): 1130, 1156, 1222, 1344, 1609, 1686, 2107, 2958;  $[\alpha]_D = -377$  ( $c = 0.981$  in  $\text{CHCl}_3$ ); HRMS (ESI) calcd for  $\text{C}_{13}\text{H}_{22}\text{N}_3\text{O}_3$  ( $\text{M} + \text{H}$ ) $^+$  268.1661, found 268.1662.

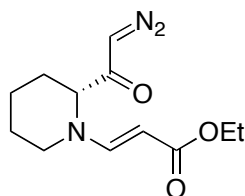

**(R,E)-Ethyl 3-(2-(2-Diazoacetyl)piperidin-1-yl)acrylate (13):** yellow oil (42% yield);  $^1\text{H}$  NMR (400 MHz,  $\text{CDCl}_3$ )  $\delta$ : 1.25 (t,  $J = 7.1$  Hz, 3H), 1.34-1.75 (m, 5H), 2.33-2.36 (bd,  $J = 13.4$  Hz, 1H), 3.18 (bs, 1H), 3.39-3.42 (d,  $J = 12.9$  Hz, 1H), 3.99 (d,  $J = 4.4$  Hz, 1H), 4.13 (q,  $J = 7.1$  Hz, 2H), 4.72 (d,  $J = 13.2$  Hz, 1H), 5.42 (s, 1H), 7.43 (d,  $J = 13.2$  Hz, 1H);  $^{13}\text{C}$  NMR (400 MHz,  $\text{CDCl}_3$ )  $\delta$ : 14.5, 20.1, 24.6, 25.6, 48.0, 54.1, 59.2, 64.3, 86.0, 152.2, 169.4, 192.9; IR (neat,  $\text{cm}^{-1}$ ): 1144, 1369, 1607, 1686, 2106;  $[\alpha]_D = -402$  ( $c = 1.02$  in  $\text{CHCl}_3$ ); HRMS (ESI) calcd for  $\text{C}_{12}\text{H}_{18}\text{N}_3\text{O}_3$  ( $\text{M} + \text{H}$ ) $^+$  252.1348, found 252.1350.

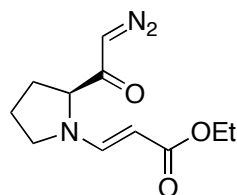

**(S,E)-Ethyl 3-(2-(2-Diazoacetyl)pyrrolidin-1-yl)acrylate (15):** yellow oil (52% yield);  $^1\text{H}$  NMR (400 MHz,  $\text{CDCl}_3$ )  $\delta$ : 1.25 (t,  $J = 7.1$  Hz, 3H), 1.90-2.01 (m, 2H), 2.08-2.28 (m, 2H), 3.15-3.60 (bm, 2H), 4.03 (bs, 1H), 4.08-4.17 (m, 2H), 4.63 (d,  $J = 13.1$  Hz, 1H), 5.37 (s, 1H), 7.56 (d,  $J = 13.1$  Hz, 1H);  $^{13}\text{C}$  NMR (400 MHz,  $\text{CDCl}_3$ )  $\delta$ : 14.5, 23.7, 30.9, 49.2, 53.6, 59.1, 68.1, 88.5, 147.8, 168.9, 194.6; IR (neat,  $\text{cm}^{-1}$ ):

1143, 1364, 1609, 1686, 2107;  $[\alpha]_D = -302$  ( $c = 0.990$  in  $\text{CHCl}_3$ ); HRMS (ESI) calcd for  $\text{C}_{11}\text{H}_{16}\text{N}_3\text{O}_3$  ( $\text{M} + \text{H}$ )<sup>+</sup> 238.1192, found 238.1186.

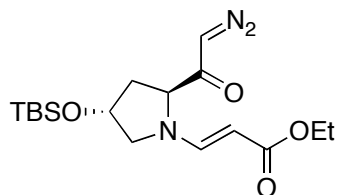

**(E)-Ethyl 3-((2S,4R)-4-(tert-Butyldimethylsilyloxy)-2-(2-diazoacetyl)pyrrolidin-1-yl)acrylate (17):** yellow oil (40% yield);  $^1\text{H}$  NMR (400 MHz,  $\text{CDCl}_3$ )  $\delta$ : 0.05 (d,  $J = 3.0$  Hz, 6H), 0.85 (s, 9H), 1.25 (t,  $J = 7.1$  Hz, 3H), 2.06-2.16 (m, 1H), 2.17-2.29 (m, 1H), 3.18 (d,  $J = 10.2$  Hz, 1H), 3.57 (bd,  $J = 6.4$  Hz, 1H), 4.07-4.20 (m, 3H), 4.40-4.48 (m, 1H), 4.61 (d,  $J = 13.2$  Hz, 1H), 5.38 (s, 1H), 7.50 (d,  $J = 13.2$  Hz, 1H);  $^{13}\text{C}$  NMR (400 MHz,  $\text{CDCl}_3$ )  $\delta$ : -4.9, -4.8, 14.5, 18.0, 25.7, 40.2, 53.5, 58.9, 59.2, 66.2, 70.0, 88.8, 148.4, 168.9, 194.0; IR (neat,  $\text{cm}^{-1}$ ): 777, 838, 1145, 1252, 1363, 1616, 1685, 2108, 2857, 2930, 2955;  $[\alpha]_D = -134$  ( $c = 1.02$  in  $\text{CHCl}_3$ ); HRMS(ESI) calcd for  $\text{C}_{17}\text{H}_{30}\text{N}_3\text{O}_4\text{Si}$  ( $\text{M} + \text{H}$ )<sup>+</sup> 368.2006, found 368.2003.

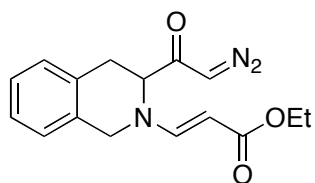

**(E)-Ethyl 3-(3-(2-Diazoacetyl)-3,4-dihydroisoquinolin-2(1H)-yl)acrylate (19):** yellow syrup (48% yield);  $^1\text{H}$  NMR (400 MHz,  $\text{CDCl}_3$ )  $\delta$ : 1.28 (t,  $J = 7.1$  Hz, 3H), 3.09-3.18 (dd,  $J = 6.0, 15.5$  Hz, 1H), 3.30-3.40 (bd,  $J = 15.5$  Hz, 1H), 4.10-4.25 (m, 3H), 4.38 (s, 2H), 4.84 (d,  $J = 13.2$  Hz, 1H), 5.20 (s, 1H), 7.09-7.25 (m, 4H), 7.60 (d,  $J = 13.2$  Hz, 1H);  $^{13}\text{C}$  NMR (400 MHz,  $\text{CDCl}_3$ )  $\delta$ : 14.5, 31.1, 48.0, 54.3, 59.3, 64.8, 88.1, 126.0, 127.1, 127.5, 128.5, 131.2, 131.9, 150.9, 168.8, 193.2; IR (neat,  $\text{cm}^{-1}$ ): 752, 795, 1048, 1152, 1352, 1609, 1683, 2109, 2980; HRMS (ESI) calcd for  $\text{C}_{16}\text{H}_{18}\text{N}_3\text{O}_3$  ( $\text{M} + \text{H}$ )<sup>+</sup> 300.1348, found 300.1341.

### 3. General procedure for cyclization via Wolff rearrangement

To a solution of the diazoketone (0.1 mmol) in  $\text{CH}_2\text{Cl}_2$  (0.5 mL),  $\text{PhCO}_2\text{Ag}$  (0.01 mmol) was added. Under air, the flask was sealed with a septum. The reaction was stirred for 24 h in the dark. Then the crude mixture was directly subjected to silica gel column chromatography (20% acetone/ $\text{CH}_2\text{Cl}_2$  to 1-3% MeOH/ $\text{CH}_2\text{Cl}_2$ ), affording the enaminone.

To synthesize enaminone **16**,  $\text{Ag}_2\text{O}$  and  $\text{C}_2\text{H}_4\text{Cl}_2$  were used as catalyst and solvent respectively. For the synthesis of enaminone **8**, 20 mol% of  $\text{PhCO}_2\text{Ag}$  was employed.

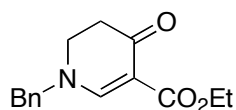

**Ethyl 1-Benzyl-4-oxo-1,4,5,6-tetrahydropyridine-3-carboxylate (2):** clear oil (99% yield);  $^1\text{H}$  NMR (400 MHz,  $\text{CDCl}_3$ )  $\delta$ : 1.32 (t,  $J = 7.1$  Hz, 3H), 2.50 (dd,  $J = 7.6, 7.8$  Hz, 2H), 3.45 (dd,  $J = 7.6, 7.8$  Hz, 2H), 4.26 (q,  $J = 7.1$  Hz, 2H), 4.55 (s, 2H), 7.25-7.29 (m, 2H), 7.35-7.44 (m, 3H), 8.32 (s, 1H);  $^{13}\text{C}$  NMR (400 MHz,  $\text{CDCl}_3$ )  $\delta$ : 14.5, 35.9, 46.0, 59.9, 61.0, 100.7, 127.7, 128.9, 129.3, 134.0, 159.4, 165.4, 186.4; IR (neat,  $\text{cm}^{-1}$ ): 1053, 1152, 1600, 1659, 1716; HRMS (ESI) calcd for  $\text{C}_{15}\text{H}_{18}\text{NO}_3$  ( $\text{M} + \text{H}$ ) $^+$  260.1287, found 260.1290.

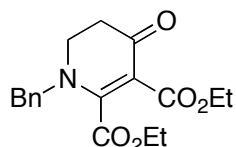

**Diethyl 1-Benzyl-4-oxo-1,4,5,6-tetrahydropyridine-2,3-dicarboxylate (4):** clear oil (80% yield);  $^1\text{H}$  NMR (400 MHz,  $\text{CDCl}_3$ )  $\delta$ : 1.27-1.36 (m, 6H), 2.46 (t,  $J = 7.6$  Hz, 2H), 3.50 (t,  $J = 7.4$  Hz, 2H), 4.26 (q,  $J = 7.1$  Hz, 2H), 4.40 (q,  $J = 7.2$  Hz, 2H), 4.48 (s, 2H), 7.31-7.43 (m, 5H);  $^{13}\text{C}$  NMR (400 MHz,  $\text{CDCl}_3$ )  $\delta$ : 13.8, 14.4, 35.5, 47.0, 57.2, 60.5, 62.8, 100.6, 127.9, 128.8, 129.2, 134.0, 160.2, 163.6, 165.3, 186.8; IR (neat,  $\text{cm}^{-1}$ ): 1154, 1256, 1377, 1452, 1550, 1669, 1739, 2981; HRMS (ESI) calcd for  $\text{C}_{18}\text{H}_{22}\text{NO}_5$  ( $\text{M} + \text{H}$ ) $^+$  332.1498, found 332.1494.

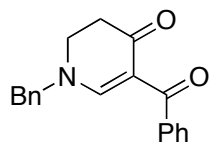

**5-Benzoyl-1-benzyl-2,3-dihydropyridin-4(1H)-one (6):** white solid (88% yield); mp: 81.7-83.1  $^\circ\text{C}$ ;  $^1\text{H}$  NMR (400 MHz,  $\text{CDCl}_3$ )  $\delta$ : 2.54 (t,  $J = 7.6$  Hz, 2H), 3.45 (t,  $J = 7.6$  Hz, 2H), 4.59 (s, 2H), 7.27-7.32 (d,  $J = 6.4$  Hz, 2H), 7.34-7.49 (m, 6H), 7.65 (d,  $J = 7.0$  Hz, 2H), 8.26 (s, 1H);  $^{13}\text{C}$  NMR (400 MHz,  $\text{CDCl}_3$ )  $\delta$ : 35.6, 46.2, 61.1, 110.2, 127.6, 127.8, 128.9, 129.0, 129.3, 131.2, 133.9, 140.1, 159.6, 186.7, 192.5; IR (neat,  $\text{cm}^{-1}$ ): 1188, 1337, 1583, 1623, 1652; HRMS (ESI) calcd for  $\text{C}_{19}\text{H}_{18}\text{NO}_2$  ( $\text{M} + \text{H}$ ) $^+$  292.1338, found 292.1332.

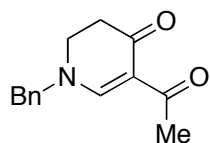

**5-Acetyl-1-benzyl-2,3-dihydropyridin-4(1H)-one (8):** clear oil (93% yield);  $^1\text{H}$  NMR (400 MHz,  $\text{CDCl}_3$ )  $\delta$ : 2.49 (m, 5H), 3.46 (dd,  $J = 7.6, 7.8$  Hz, 2H), 4.57 (s, 2H), 7.24-7.28 (m, 2H), 7.35-7.45 (m, 3H), 8.44 (s, 1H);  $^{13}\text{C}$  NMR (400 MHz,  $\text{CDCl}_3$ )  $\delta$ : 30.5, 35.7, 46.2, 61.3, 110.0, 127.8, 129.0, 129.3, 133.8, 159.2, 188.0, 195.3; IR (neat,  $\text{cm}^{-1}$ ): 1045, 1325, 1361, 1387, 1577, 1636, 2922; HRMS (ESI) calcd for  $\text{C}_{14}\text{H}_{16}\text{NO}_2$  ( $\text{M} + \text{H}$ ) $^+$  230.1181, found 230.1183.

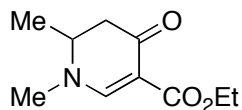

**(S)-Ethyl 1,6-Dimethyl-4-oxo-1,4,5,6-tetrahydropyridine-3-carboxylate (10):** clear oil (93% yield);  $^1\text{H}$  NMR (400 MHz,  $\text{CDCl}_3$ )  $\delta$ : 1.27 (m, 6H), 2.27 (dd,  $J = 3.7, 15.9$  Hz, 1H), 2.79 (dd,  $J = 6.7, 15.9$  Hz, 1H), 3.22 (s, 3H), 3.65 (m, 1H), 4.21 (q,  $J = 7.1$  Hz, 2H), 8.02 (s, 1H);  $^{13}\text{C}$  NMR (400 MHz,  $\text{CDCl}_3$ )  $\delta$ : 14.5, 15.5, 42.1, 42.7, 54.7, 59.8, 99.6, 158.5, 165.4, 185.9; IR (neat,  $\text{cm}^{-1}$ ): 1055, 1173, 1279, 1303, 1332, 1383, 1426, 1606, 1652, 1714, 2975; HRMS (ESI) calcd for  $\text{C}_{10}\text{H}_{16}\text{NO}_3$  ( $\text{M} + \text{H}$ ) $^+$  198.1130, found 198.1128.

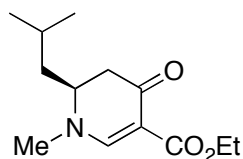

**(S)-Ethyl 6-Isobutyl-1-methyl-4-oxo-1,4,5,6-tetrahydropyridine-3-carboxylate (12):** clear oil (76% yield);  $^1\text{H}$  NMR (400 MHz,  $\text{CDCl}_3$ )  $\delta$ : 0.86 (d,  $J = 6.4$  Hz, 3H), 0.92 (d,  $J = 6.3$  Hz, 3H), 1.26-1.42 (m, 4H), 1.59-1.72 (m, 2H), 2.36 (dd,  $J = 2.2, 15.9$  Hz, 1H), 2.78 (dd,  $J = 6.7, 15.9$  Hz, 1H), 3.23 (s, 3H), 3.46-3.55 (m, 1H), 4.22 (q,  $J = 7.1$  Hz, 2H), 8.03 (s, 1H);  $^{13}\text{C}$  NMR (400 MHz,  $\text{CDCl}_3$ )  $\delta$ : 14.5, 21.1, 23.4, 24.1, 37.1, 39.5, 42.6, 57.4, 59.8, 99.4, 158.6, 165.3, 185.7; IR (neat,  $\text{cm}^{-1}$ ): 1047, 1061, 1174, 1296, 1330, 1396, 1603, 1655, 1716, 2957;  $[\alpha]_D = -38$  ( $c = 0.95$  in  $\text{CHCl}_3$ ); HRMS (ESI) calcd for  $\text{C}_{13}\text{H}_{22}\text{NO}_3$  ( $\text{M} + \text{H}$ ) $^+$  240.1600, found 240.1605.

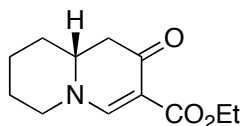

**(R)-Ethyl 2-Oxo-2,6,7,8,9,9a-hexahydro-1H-quinolizine-3-carboxylate (14):** white solid (93% yield); mp: 55.8-57.2  $^{\circ}\text{C}$ ;  $^1\text{H}$  NMR (400 MHz,  $\text{CDCl}_3$ )  $\delta$ : 1.30 (t,  $J = 7.1$  Hz, 3H), 1.40-1.79 (m, 3H), 1.79-1.95 (m, 3H), 2.41 (dd,  $J = 10.8, 16.2$  Hz, 1H), 2.64 (dd,  $J = 6.2, 16.2$  Hz, 1H), 3.27 (dt,  $J = 2.9, 12.8$  Hz, 1H), 3.46-3.57 (m, 1H), 3.59-3.67 (m, 1H), 4.23 (q,  $J = 7.1$  Hz, 2H), 8.02 (s, 1H);  $^{13}\text{C}$  NMR (400 MHz,  $\text{CDCl}_3$ )  $\delta$ : 14.5, 22.9, 25.9, 31.8, 43.3, 54.4, 56.8, 59.8, 100.5, 159.1, 165.3, 186.7; IR (neat,  $\text{cm}^{-1}$ ): 1153, 1306, 1595, 1663, 1719, 2937;  $[\alpha]_D = -16$  ( $c = 0.96$  in  $\text{CHCl}_3$ ); HRMS (ESI) calcd for  $\text{C}_{12}\text{H}_{18}\text{NO}_3$  ( $\text{M} + \text{H}$ ) $^+$  224.1287, found 224.1282.

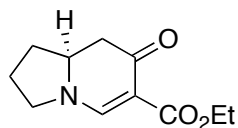

**(S)-Ethyl 7-Oxo-1,2,3,7,8,8a-hexahydroindolizine-6-carboxylate (16):** yellow oil (86% yield);  $^1\text{H}$  NMR (400 MHz,  $\text{CDCl}_3$ )  $\delta$ : 1.30 (t,  $J = 7.1$  Hz, 3H), 1.64-1.78 (m, 1H), 1.91-2.06 (m, 1H), 2.12-2.22 (m, 1H), 2.30-2.42 (m, 2H), 2.56 (dd,  $J = 4.6, 15.6$  Hz, 1H), 3.57-3.68 (m, 1H), 3.70-3.85 (m, 2H), 4.23 (q,  $J = 7.1$  Hz, 2H), 8.30 (s, 1H);  $^{13}\text{C}$  NMR (400 MHz,  $\text{CDCl}_3$ )  $\delta$ : 14.5, 24.1, 32.6, 41.9, 50.5, 58.1, 59.6, 100.0, 155.7, 165.4, 187.2; IR (neat,  $\text{cm}^{-1}$ ): 1056, 1145, 1190, 1288, 1599, 1651, 1716, 2977;  $[\alpha]_D = -574$  ( $c = 1.01$  in  $\text{CHCl}_3$ ); HRMS (ESI) calcd for  $\text{C}_{11}\text{H}_{16}\text{NO}_3$  ( $\text{M} + \text{H}$ ) $^+$  210.1130, found 210.1127.

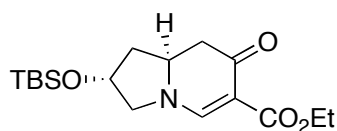

**(2R,8aS)-Ethyl 2-(tert-Butyldimethylsilyloxy)-7-oxo-1,2,3,7,8,8a-hexahydroindolizine-6-carboxylate (18):** yellow oil (79% yield);  $^1\text{H}$  NMR (400 MHz,  $\text{CDCl}_3$ )  $\delta$ : 0.07 (d,  $J = 1.0$  Hz, 6H), 0.86 (s, 9H), 1.30 (t,  $J = 7.1$  Hz, 3H), 1.72-1.82 (m, 1H), 2.22 (dd,  $J = 5.4, 12.7$  Hz, 1H), 2.35 (t,  $J = 15.7$  Hz, 1H), 2.56 (dd,  $J = 4.6, 15.6$  Hz, 1H), 3.56 (d,  $J = 12.2$  Hz, 1H), 3.78 (dd,  $J = 4.1, 12.1$  Hz, 1H), 4.07-4.20 (m, 1H), 4.21 (q,  $J = 7.1$  Hz, 2H), 4.56 (t,  $J = 3.8$  Hz, 1H), 8.26 (s, 1H);  $^{13}\text{C}$  NMR (400 MHz,  $\text{CDCl}_3$ )  $\delta$ : -4.9, -4.8, 14.5, 17.9, 25.7, 29.7, 41.7, 42.2, 56.0, 59.7, 70.3, 100.4, 155.9, 165.4, 187.2; IR (neat,  $\text{cm}^{-1}$ ): 1069, 1191, 1290, 1325, 1374, 1594, 1717, 2857, 2931, 2954;  $[\alpha]_D = -8.9$  ( $c = 0.99$  in  $\text{CHCl}_3$ ); HRMS (ESI) calcd for  $\text{C}_{17}\text{H}_{30}\text{NO}_4\text{Si}$  ( $\text{M} + \text{H}$ ) $^+$  340.1944, found 340.1933.

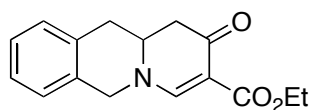

**Ethyl 2-Oxo-2,6,11,11a-tetrahydro-1H-pyrido[1,2-b]isoquinoline-3-carboxylate (20):** clear oil (81% yield);  $^1\text{H}$  NMR (400 MHz,  $\text{CDCl}_3$ )  $\delta$ : 1.30 (t,  $J = 7.1$ , 3H), 2.57 (dd,  $J = 7.8, 16.3$  Hz, 1H), 2.80-2.85 (m, 2H), 3.08-3.15 (dd,  $J = 12.1, 15.8$  Hz, 1H), 3.89-3.93 (m, 1H), 4.24 (q,  $J = 7.1$ , 2H), 4.67 (d,  $J = 15.8$ , 1H), 4.78 (d,  $J = 15.8$ , 1H), 7.12-7.19 (m, 2H), 7.25-7.27 (m, 2H), 8.24 (s, 1H);  $^{13}\text{C}$  NMR (400 MHz,  $\text{CDCl}_3$ )  $\delta$ : 14.5, 33.2, 41.5, 54.3, 55.2, 59.9, 100.5, 125.7, 127.2, 127.9, 128.7, 131.8, 133.3, 158.2, 165.2, 186.0; IR (neat,  $\text{cm}^{-1}$ ): 1052, 1152, 1189, 1304, 1348, 1393, 1456, 1595, 1657, 1715, 2979; HRMS (ESI) calcd for  $\text{C}_{16}\text{H}_{18}\text{NO}_3$  ( $\text{M} + \text{H}$ ) $^+$  272.1287, found 272.1287.



#### 4. Determination of ee by derivatization using Mosher's acid chloride

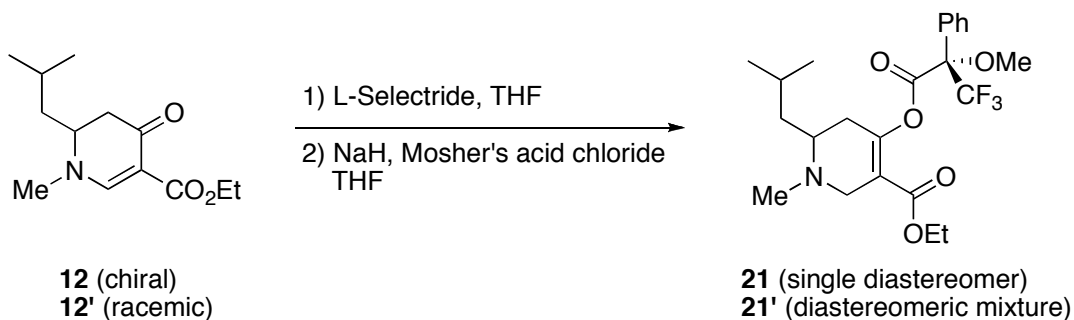

First, racemic enaminone **12'** was prepared. Racemic and enantiopure enaminones were derivatized by the following procedure.

The enaminone (0.1 mmol) was dissolved in THF (1 mL) at  $-78\text{ }^{\circ}\text{C}$ . L-Selectride (1.0 M in THF, 1.1 equiv.) was added, and stirring was continued for 3 h at  $-78\text{ }^{\circ}\text{C}$ . Acetone (0.5 mL) was added and the solution was warmed to room temperature and evaporated under reduced pressure. The crude mixture was purified by preparative TLC, affording the corresponding enol. The enol was dissolved in THF (0.7 mL) and the solution was cooled to  $0\text{ }^{\circ}\text{C}$ . NaH (2 equiv.) was added to the solution, which was stirred for another 10 min. (*R*)-Mosher's acid chloride in THF (0.3 mL) was then added to the reaction mixture. The reaction was warmed to room temperature and left for 2 h with stirring. Water and EtOAc were added to the reaction mixture, and the partitioned organic layer was washed with brine, dried over  $\text{MgSO}_4$  and concentrated. The crude mixture was purified by preparative TLC, affording the desired Mosher's ester derivative. The diastereomeric mixture **21'** (3.3 mg) was dissolved in  $\text{CDCl}_3$  (1.2 mL) and the  $^{19}\text{F}$  NMR was taken. Slightly overlapping  $^{19}\text{F}$  peaks were separated using Gaussian deconvolution. The  $^{19}\text{F}$  NMR of compound **21** was also recorded at a similar concentration, and a single  $^{19}\text{F}$  peak was observed.

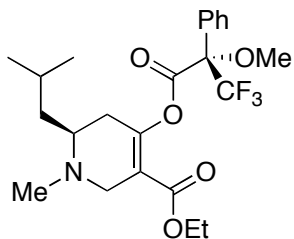

**(S)-Ethyl 6-isobutyl-1-methyl-4-((S)-3,3,3-trifluoro-2-methoxy-2-phenylpropanoyloxy)-1,2,5,6-tetrahydropyridine-3-carboxylate (21)**: clear oil;  $^1\text{H}$  NMR (400 MHz,  $\text{CDCl}_3$ )  $\delta$ : 0.87-0.94 (d,  $J = 6.6$  Hz, 6H), 1.19 (t,  $J = 7.1$  Hz, 3H), 1.21-1.27 (m, 1H), 1.40-1.50 (m, 1H), 1.57-1.71 (m, 1H), 2.00-2.11 (m, 1H), 2.22-2.32 (m, 1H), 2.35 (s, 3H), 2.78-2.89 (m, 1H), 3.42-3.57 (dt,  $J = 2.1, 17.2$  Hz, 2H), 3.65 (s, 3H), 4.10 (q,  $J = 7.1$  Hz, 2H), 7.40-7.47 (m, 3H), 7.63-7.69 (m, 2H);  $^{13}\text{C}$  NMR (400 MHz,  $\text{CDCl}_3$ )  $\delta$ : 14.1, 22.4, 23.0, 24.7, 29.8, 38.5, 40.3, 51.7, 55.3, 55.7, 60.7, 84.5, 84.8, 117.1, 121.6, 124.5, 127.7, 128.4, 129.8, 131.4, 151.2, 163.9, 164.0; IR (neat,  $\text{cm}^{-1}$ ): 703, 1004, 1045, 1123, 1174, 1236, 1732, 1763, 2930, 2958;  $[\alpha]_D^{25} = -0.600$  ( $c = 1.33$  in  $\text{CHCl}_3$ ); HRMS (ESI) calcd for  $\text{C}_{23}\text{H}_{31}\text{F}_3\text{NO}_5$  ( $\text{M} + \text{H}$ ) $^+$  458.2154, found 458.2156.

Enaminones **14**, **16** were derivatized similarly.

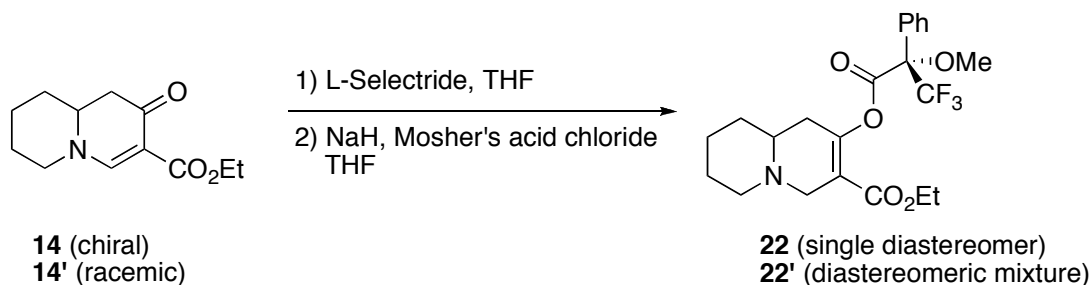

The enantiopurity of compound **22** was confirmed by HPLC analysis. The  $^{19}\text{F}$ NMR of the compound **22** showed a single  $^{19}\text{F}$  peak.

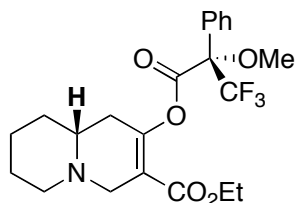

**(R)-Ethyl 2-((S)-3,3,3-Trifluoro-2-methoxy-2-phenylpropanoyloxy)-4,6,7,8,9,9a-hexahydro-1H-quinolizine-3-carboxylate (22)**: clear oil;  $^1\text{H}$  NMR (400 MHz,  $\text{CDCl}_3$ )  $\delta$ : 1.17 (t,  $J = 7.1$  Hz, 3H), 1.52-1.81 (m, 6H), 2.04-2.17 (m, 1H), 2.17-2.32 (m, 3H), 2.94-3.07 (m, 2H), 3.63 (s, 3H), 3.68 (d,  $J = 16.3$  Hz, 1H), 4.03-4.16 (m, 2H), 7.41-7.46 (m, 3H), 7.60-7.66 (m, 2H);  $^{13}\text{C}$  NMR (400 MHz,  $\text{CDCl}_3$ )  $\delta$ : 14.1, 23.5, 25.5, 32.7, 35.6, 54.0, 54.8, 55.6, 56.2, 60.8, 84.6, 84.9, 117.2, 121.6, 124.5, 127.8, 128.4, 129.8, 131.3, 151.2, 163.3, 163.7; IR (neat,  $\text{cm}^{-1}$ ): 1048, 1107, 1183, 1239, 1725, 1763, 2937;  $[\alpha]_D = -47$  ( $c = 0.39$  in  $\text{CHCl}_3$ ); HRMS (ESI) calcd for  $\text{C}_{22}\text{H}_{27}\text{F}_3\text{NO}_5$  ( $M + \text{H}$ ) $^+$  442.1841, found 442.1836.; HPLC analysis (Daicel CHIRACEL OD column) solvent system: Heptane/*i*-PrOH, 100/0 to 85/15 over 15 min; retention times: 10.5 min (**22**), 8.1 min (the other diastereomer).

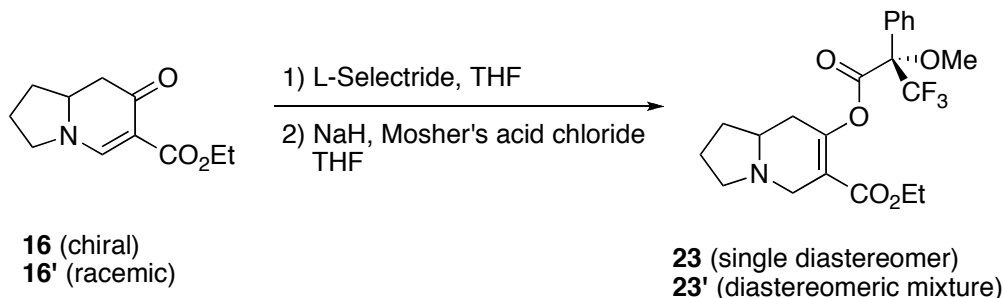

Enantiopurity of compound **23** was confirmed by HPLC analysis. A  $^{19}\text{F}$ NMR of compound **23** showed a single  $^{19}\text{F}$  peak.

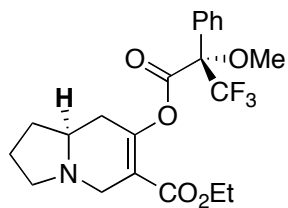

**(S)-Ethyl 7-((S)-3,3,3-Trifluoro-2-methoxy-2-phenylpropanoyloxy)-1,2,3,5,8,8a-hexahydroindolizine-6-carboxylate (23):** clear oil;  $^1\text{H}$  NMR (400 MHz,  $\text{CDCl}_3$ )  $\delta$ : 1.17 (t,  $J = 7.1$  Hz, 3H), 1.41-1.55 (m, 1H), 1.72-2.07 (m, 3H), 2.26 (q,  $J = 9.0$  Hz, 1H), 2.30-2.42 (m, 3H), 3.01 (dt,  $J = 3.5, 16.1$  Hz, 1H), 3.22 (dt,  $J = 2.2, 8.7$  Hz, 1H), 3.63 (s, 3H), 3.91 (d,  $J = 16.1$  Hz, 1H), 4.06 (q,  $J = 7.1$  Hz, 2H), 7.41-7.47 (m, 3H), 7.62-7.68 (m, 2H);  $^{13}\text{C}$  NMR (400 MHz,  $\text{CDCl}_3$ )  $\delta$ : 14.1, 22.0, 30.5, 35.2, 50.9, 53.6, 55.8, 59.3, 60.9, 84.4, 84.7, 118.3, 121.6, 124.4, 127.7, 128.5, 129.9, 131.2, 153.1, 163.5, 164.0; IR (neat,  $\text{cm}^{-1}$ ): 1002, 1056, 1108, 1172, 1234, 1733, 1767;  $[\alpha]_{\text{D}} = -46$  ( $c = 0.76$  in  $\text{CHCl}_3$ ); HRMS (ESI) calcd for  $\text{C}_{21}\text{H}_{25}\text{F}_3\text{NO}_5$  ( $\text{M} + \text{H}$ ) $^+$  428.1685, found 428.1688.; HPLC analysis (Daicel CHIRACEL OD column) solvent system: Hexanes/*i*-PrOH, 100/0 to 85/15 over 15 min; retention times: 5.3 min (**23**), 9.6 min (the other diastereomer).

## 5. References and notes

1. Diazoketone **17** was prepared on 1.0 mmol scale in EtOH. TBS protected hydroxyproline was obtained using a reported method. See: Zhang, D.; Yuan, C. *Tetrahedron Lett.* **2008**, *64*, 2480-2488.
2. For substrates from *N*-Bn glycine hydrochloride, NaCl was removed by filtration before diazotization.
3. The alkyne (1-phenylprop-2-yn-1-one) for substrate **5** was obtained using a reported method. See: Chassaing, S.; Kueny-Stotz, M.; Isorez, G.; Brouillard, R. *Eur. J. Org. Chem.* **2007**, 2438-2448.

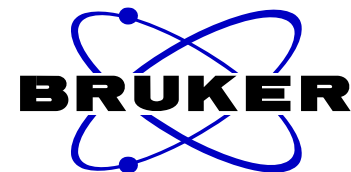

Current Data Parameters  
NAME 081010  
EXPNO 20  
PROCNO 1

F2 - Acquisition Parameters  
Date\_ 20081010  
Time 12.05  
INSTRUM spect  
PROBHD 5 mm PABBO BB-  
PULPROG zg30  
TD 65536  
SOLVENT CDC13  
NS 32  
DS 2  
SWH 8223.685 Hz  
FIDRES 0.125483 Hz  
AQ 3.9846387 sec  
RG 161  
DW 60.800 usec  
DE 6.50 usec  
TE 295.2 K  
D1 1.00000000 sec  
TD0 1

==== CHANNEL f1 =====  
NUC1 1H  
P1 9.61 usec  
PL1 -3.00 dB  
SFO1 400.1324710 MHz

F2 - Processing parameters  
SI 32768  
SF 400.1300036 MHz  
WDW EM  
SSB 0  
LB 0.30 Hz  
GB 0  
PC 1.00

7.64  
7.61  
7.35  
7.35  
7.33  
7.33  
7.26  
7.21  
7.20  
7.19

5.31  
4.73  
4.70  
4.42  
4.16  
4.14  
4.13  
4.11  
3.75

1.27  
1.25  
1.24

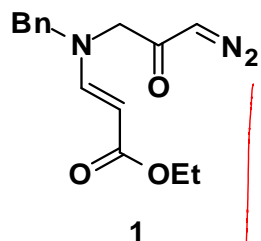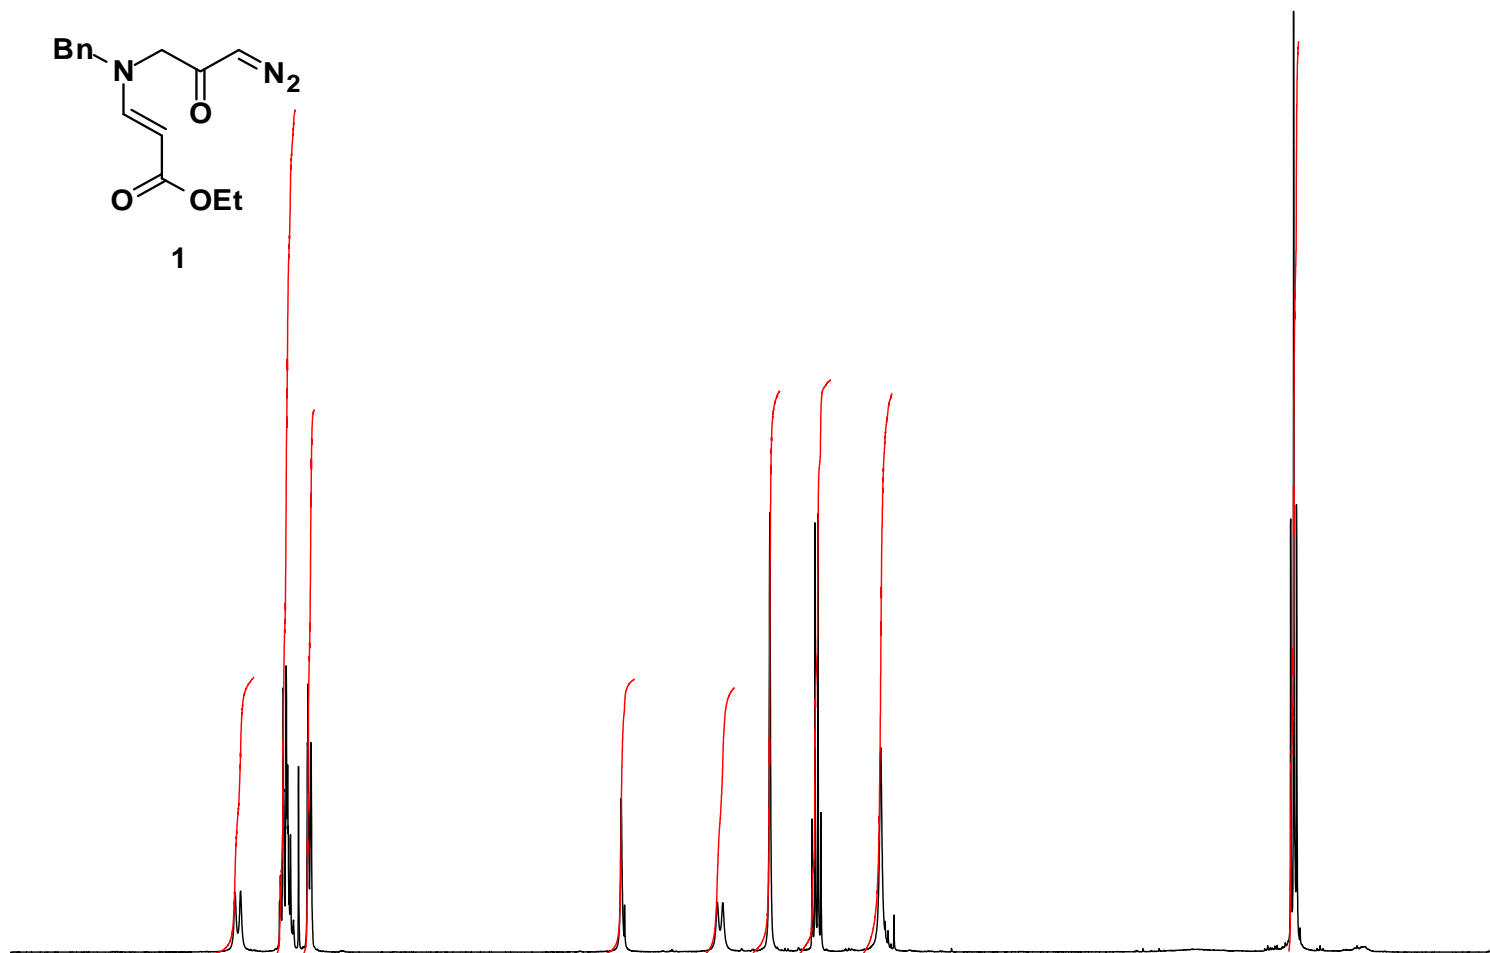

8.5 8.0 7.5 7.0 6.5 6.0 5.5 5.0 4.5 4.0 3.5 3.0 2.5 2.0 1.5 1.0 ppm

1.00  
3.05  
1.97

0.99  
0.96  
2.03  
2.07  
2.03

3.30



Current Data Parameters  
NAME 081010  
EXPNO 21  
PROCNO 1

F2 - Acquisition Parameters  
Date\_ 20081011  
Time 4.17  
INSTRUM spect  
PROBHD 5 mm PABBO BB-  
PULPROG zgpg30  
TD 65536  
SOLVENT CDC13  
NS 1024  
DS 4  
SWH 24038.461 Hz  
FIDRES 0.366798 Hz  
AQ 1.3631988 sec  
RG 2050  
DW 20.800 usec  
DE 7.50 usec  
TE 296.8 K  
D1 2.00000000 sec  
d11 0.03000000 sec  
DELTA 1.89999998 sec  
TD0 1

=====  
CHANNEL f1  
NUC1 13C  
P1 10.30 usec  
PL1 -3.00 dB  
SFO1 100.6228298 MHz

=====  
CHANNEL f2  
CPDPRG2 waltz16  
NUC2 1H  
PCPD2 90.00 usec  
PL12 16.43 dB  
PL13 19.37 dB  
PL2 -3.00 dB  
SFO2 400.1316005 MHz

F2 - Processing parameters  
SI 32768  
SF 100.6127690 MHz  
WDW EM  
SSB 0  
LB 1.00 Hz  
GB 0  
PC 1.40

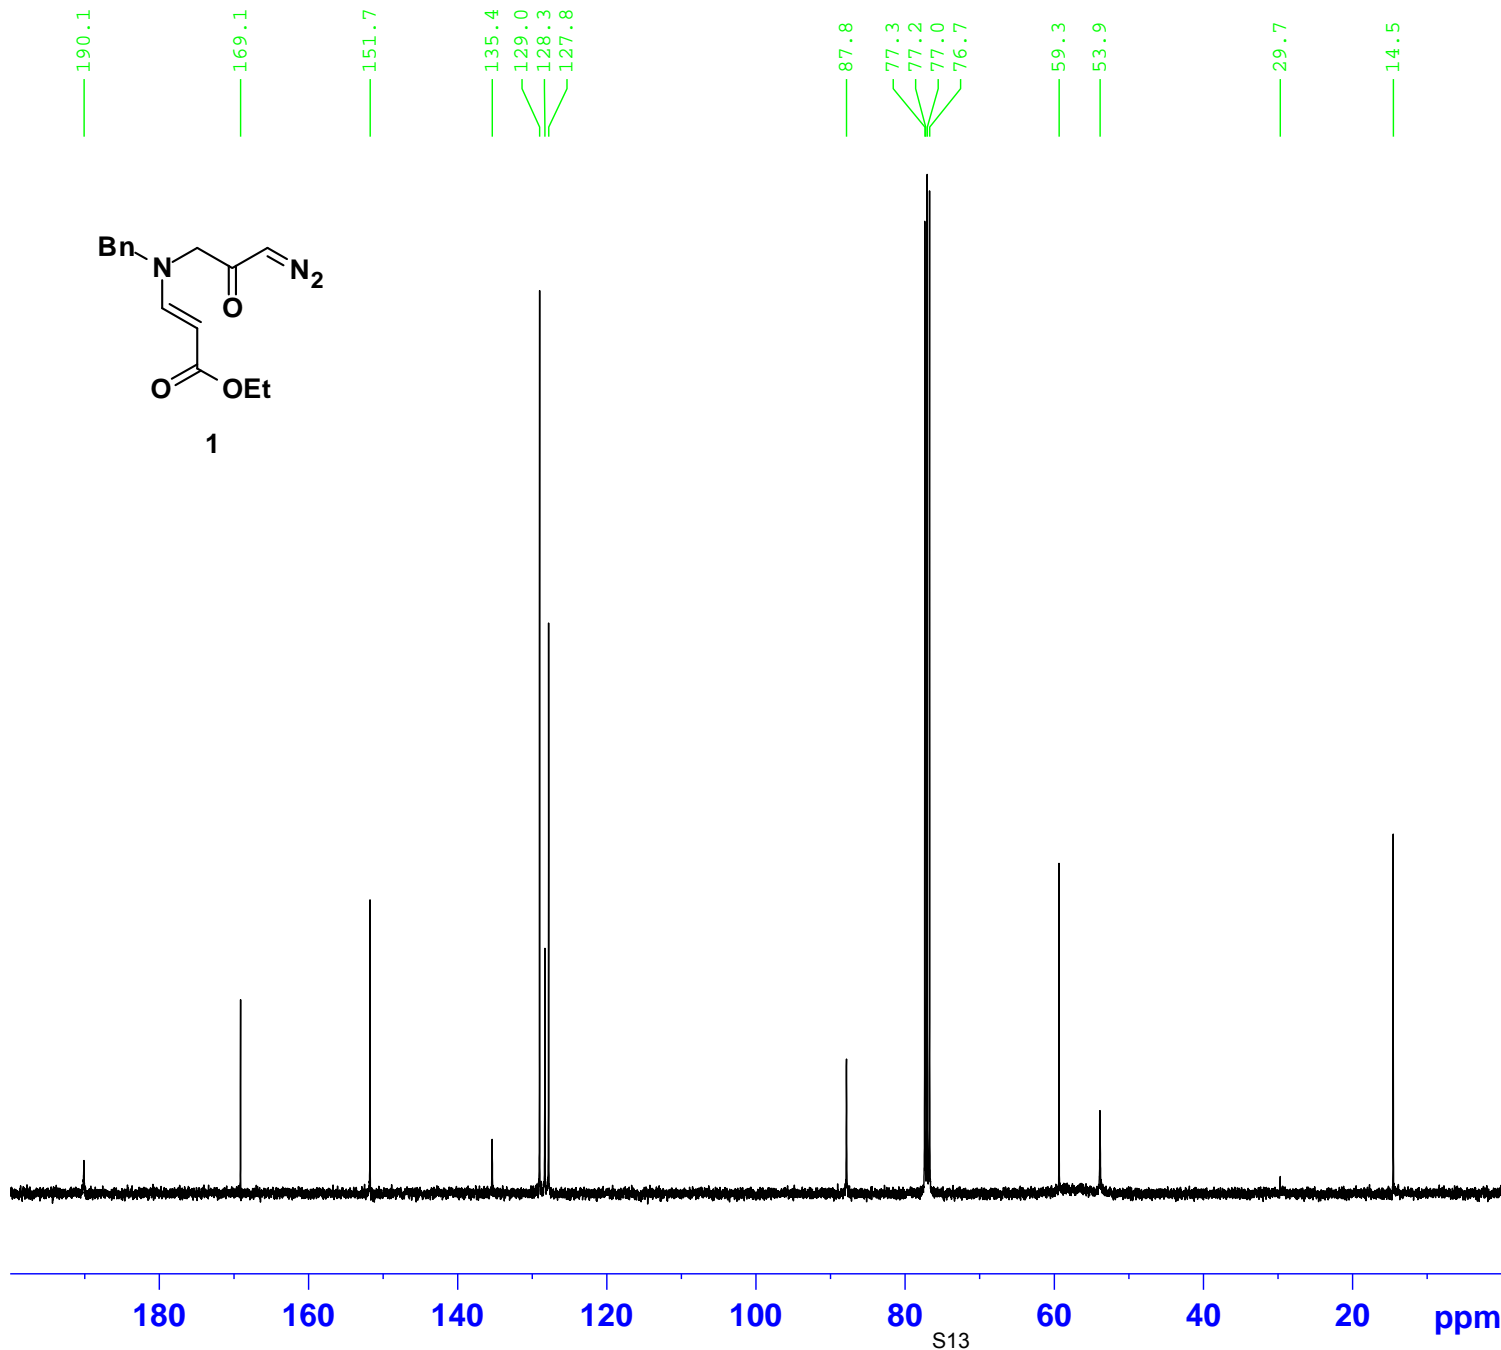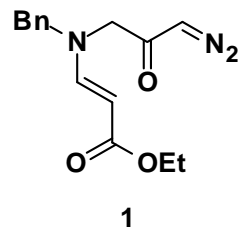

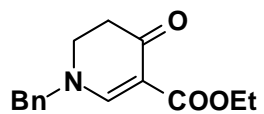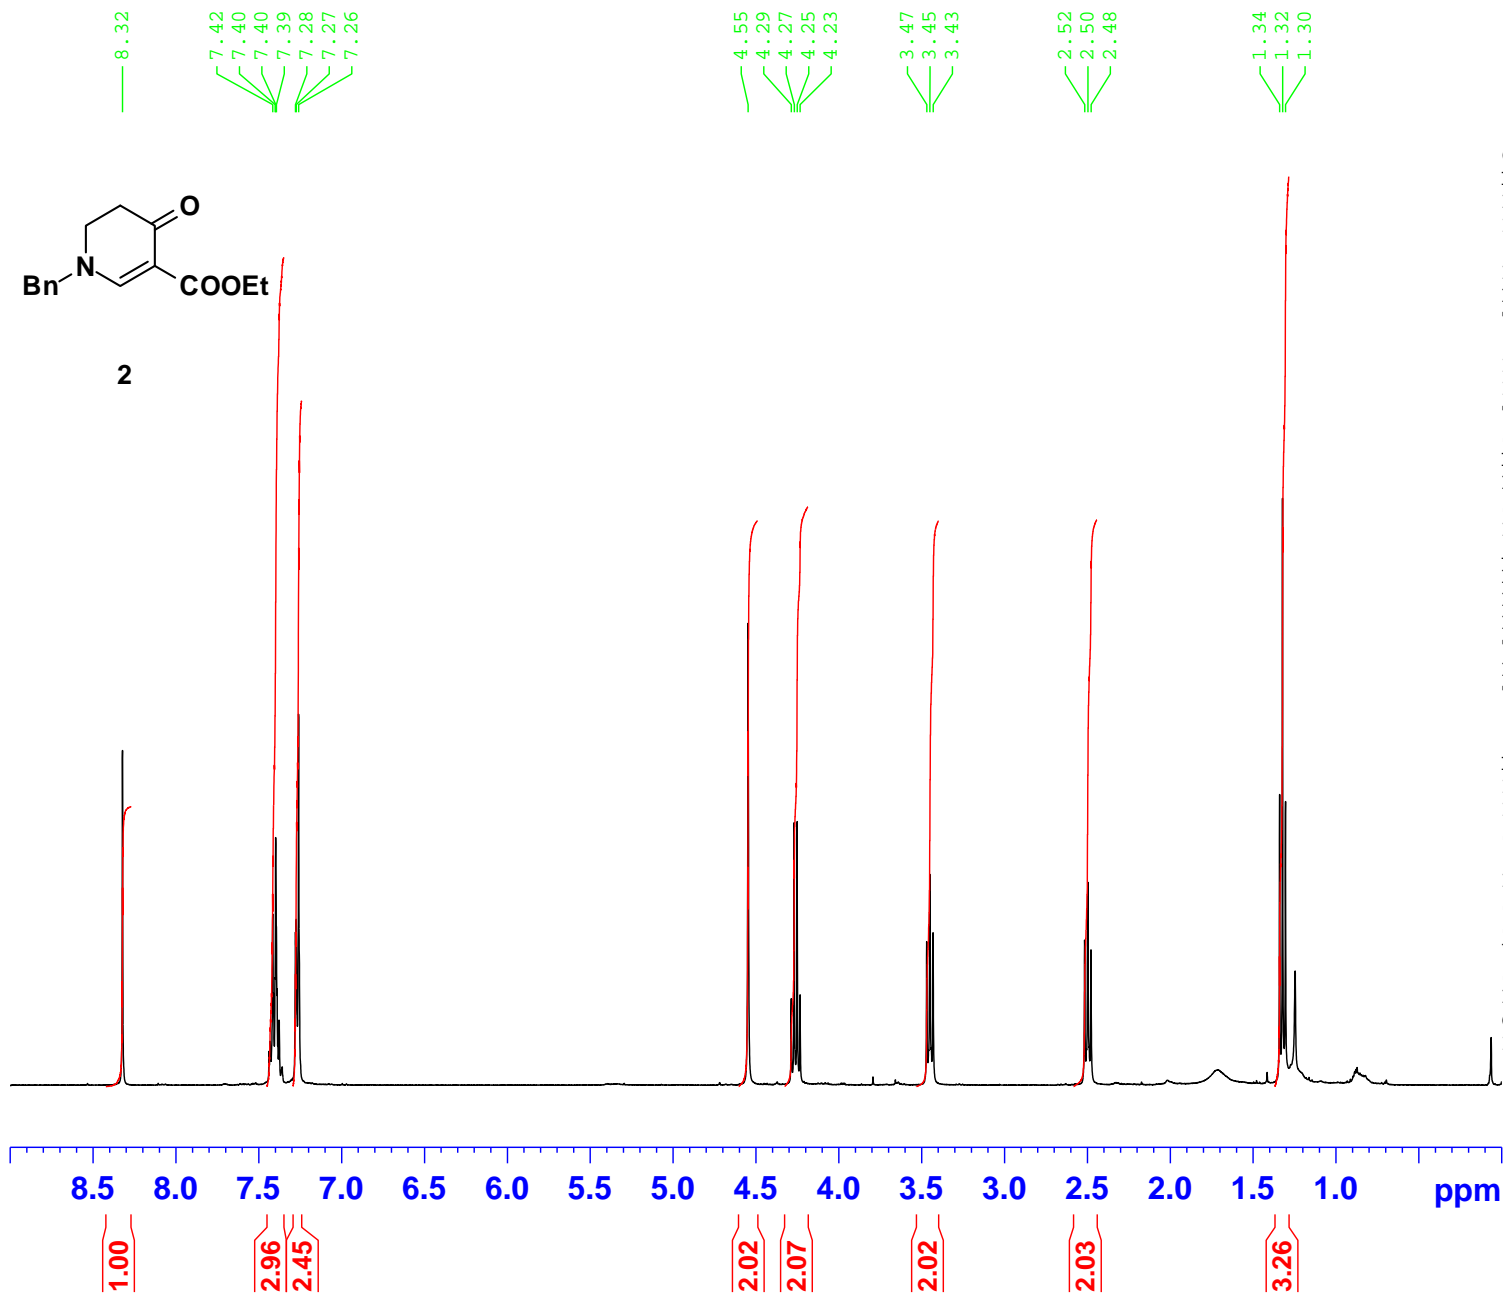

Current Data Parameters  
NAME 081023  
EXPNO 30  
PROCNO 1

F2 - Acquisition Parameters  
Date\_ 20081023  
Time 14.54  
INSTRUM spect  
PROBHD 5 mm PABBO BB-  
PULPROG zg30  
TD 65536  
SOLVENT CDC13  
NS 16  
DS 2  
SWH 8223.685 Hz  
FIDRES 0.125483 Hz  
AQ 3.9846387 sec  
RG 203  
DW 60.800 usec  
DE 6.50 usec  
TE 294.6 K  
D1 1.00000000 sec  
TD0 1

==== CHANNEL f1 =====  
NUC1 1H  
P1 9.61 usec  
PL1 -3.00 dB  
SFO1 400.1324710 MHz

F2 - Processing parameters  
SI 32768  
SF 400.1300032 MHz  
WDW EM  
SSB 0  
LB 0.30 Hz  
GB 0  
PC 1.00



Current Data Parameters  
NAME 081025  
EXPNO 20  
PROCNO 1

F2 - Acquisition Parameters  
Date\_ 20081026  
Time 1.28  
INSTRUM spect  
PROBHD 5 mm PABBO BB-  
PULPROG zgpg30  
TD 65536  
SOLVENT CDC13  
NS 1024  
DS 4  
SWH 24038.461 Hz  
FIDRES 0.366798 Hz  
AQ 1.3631988 sec  
RG 2050  
DW 20.800 usec  
DE 7.50 usec  
TE 295.1 K  
D1 2.00000000 sec  
d11 0.03000000 sec  
DELTA 1.89999998 sec  
TD0 1

==== CHANNEL f1 =====  
NUC1 13C  
P1 10.30 usec  
PL1 -3.00 dB  
SFO1 100.6228298 MHz

==== CHANNEL f2 =====  
CPDPRG2 waltz16  
NUC2 1H  
PCPD2 90.00 usec  
PL12 16.43 dB  
PL13 19.37 dB  
PL2 -3.00 dB  
SFO2 400.1316005 MHz

F2 - Processing parameters  
SI 32768  
SF 100.6127721 MHz  
WDW EM  
SSB 0  
LB 1.00 Hz  
GB 0  
PC 1.40

186.4  
165.4  
159.4  
134.0  
129.3  
128.9  
127.7  
100.7  
77.3  
77.0  
76.7  
61.0  
59.9  
46.0  
35.9  
14.5

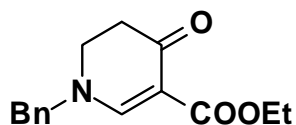

2

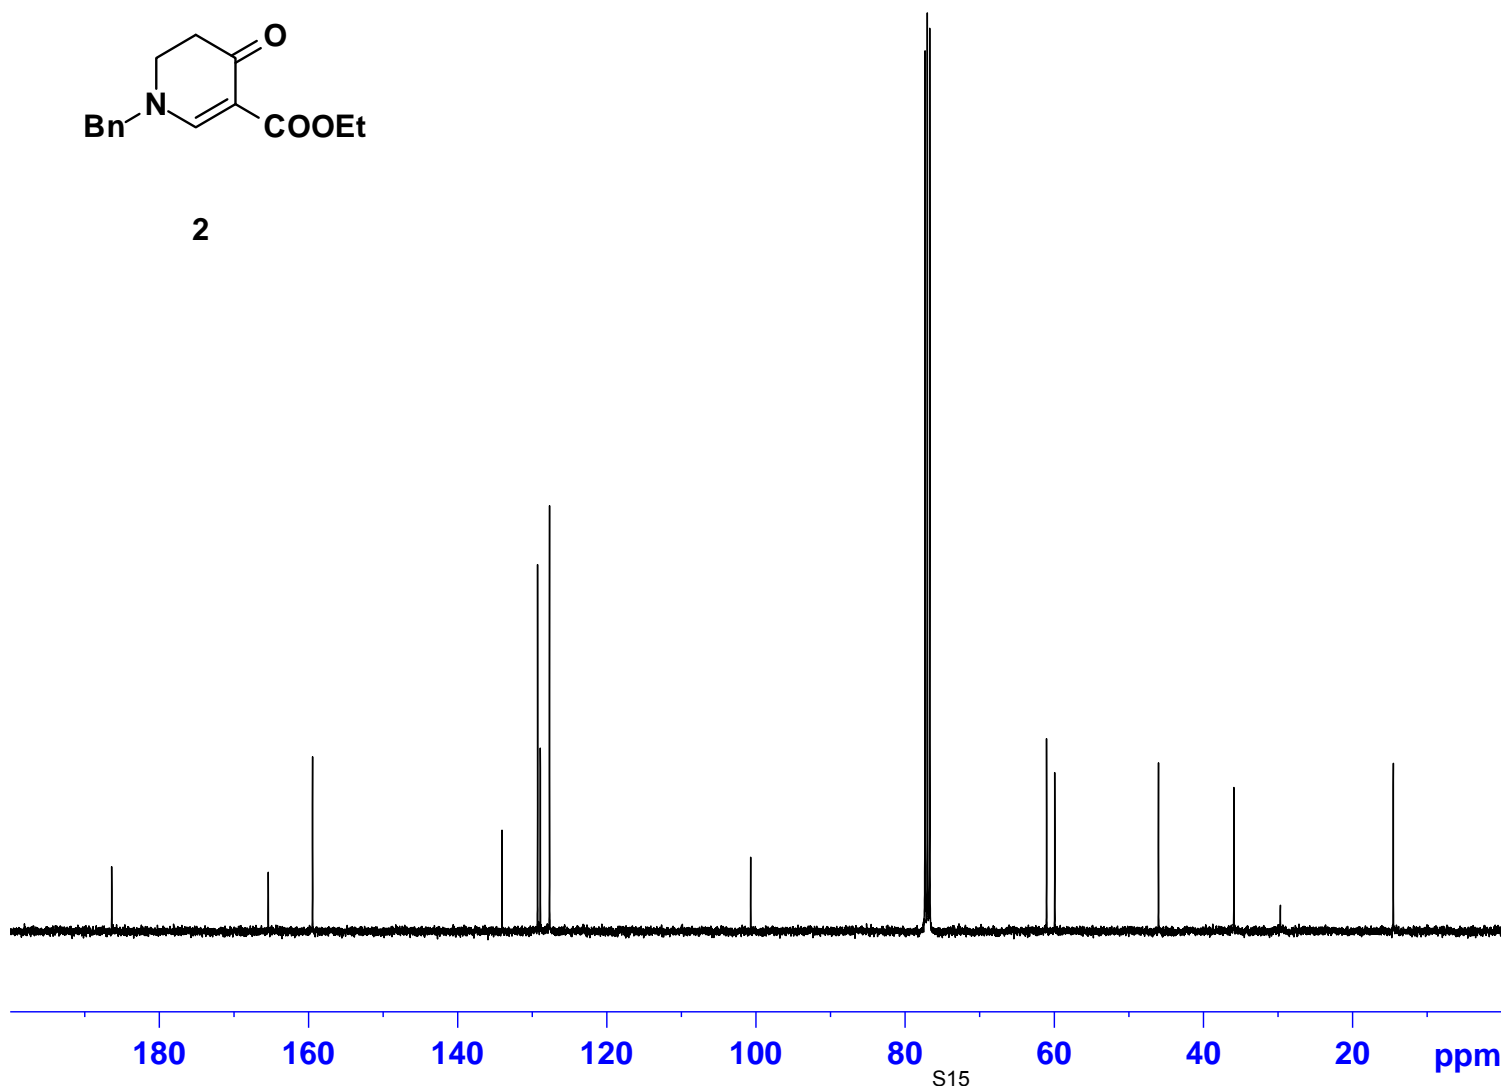

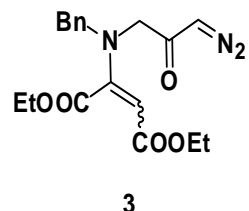

7.36  
7.34  
7.33  
7.31  
7.27  
7.26  
7.24

5.49

4.75  
4.44  
4.42  
4.40  
4.39  
4.13  
4.11  
4.09  
4.08  
3.75

1.36  
1.35  
1.33  
1.25  
1.24  
1.22

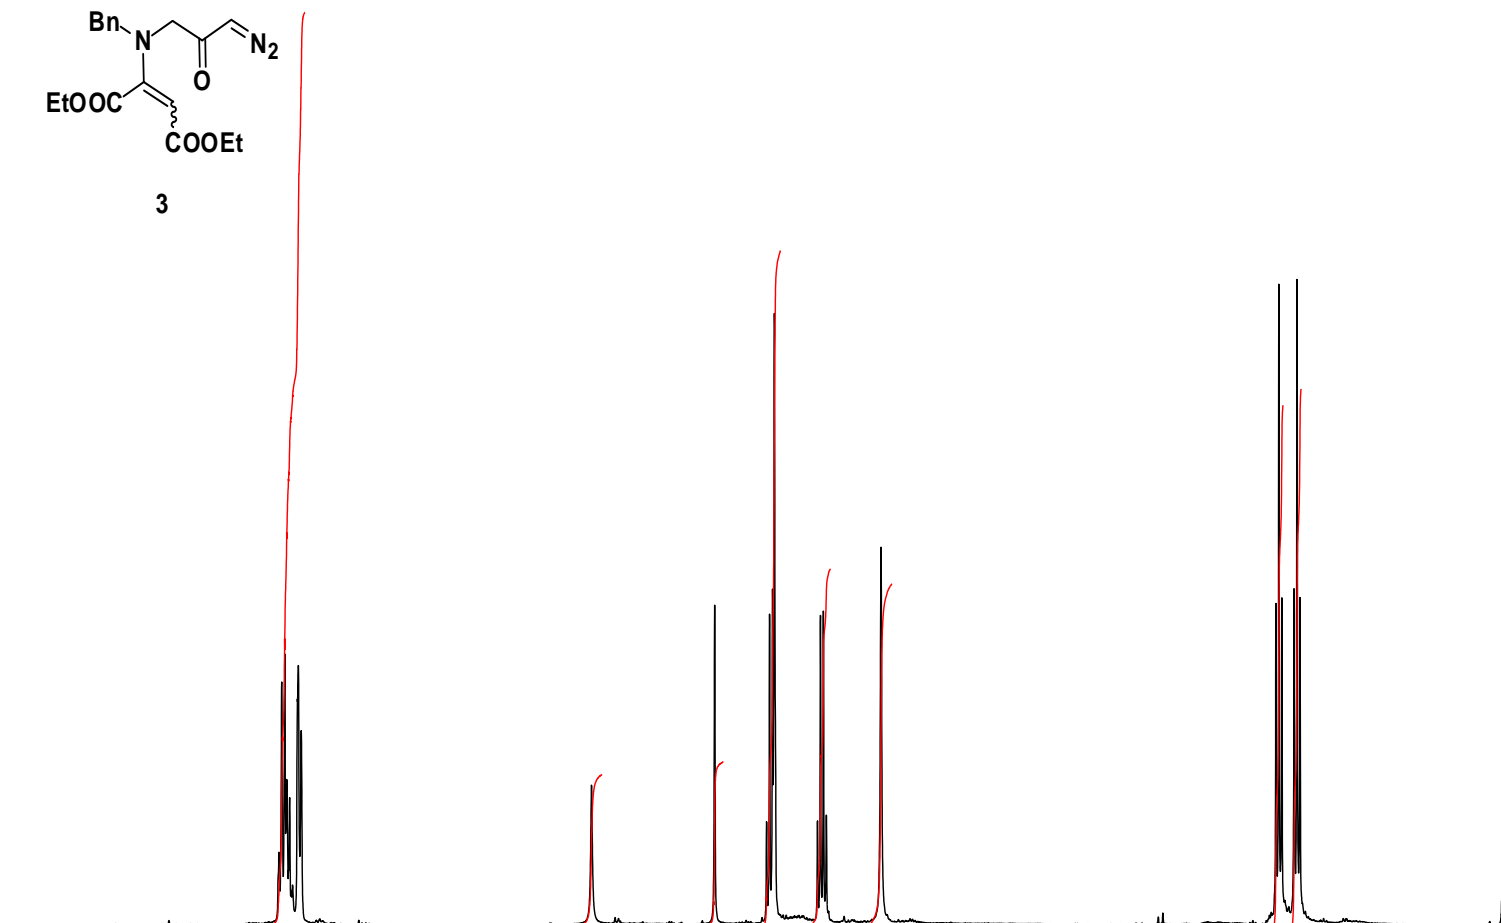

Current Data Parameters  
 NAME 090112  
 EXPNO 10  
 PROCNO 1

F2 - Acquisition Parameters  
 Date\_ 20090112  
 Time 18.44  
 INSTRUM spect  
 PROBHD 5 mm PABBO BB-  
 PULPROG zg30  
 TD 65536  
 SOLVENT CDC13  
 NS 16  
 DS 2  
 SWH 8223.685 Hz  
 FIDRES 0.125483 Hz  
 AQ 3.9846387 sec  
 RG 128  
 DW 60.800 usec  
 DE 6.50 usec  
 TE 295.0 K  
 D1 1.00000000 sec  
 TD0 1

==== CHANNEL f1 =====  
 NUC1 1H  
 P1 9.61 usec  
 PL1 -3.00 dB  
 SFO1 400.1324710 MHz

F2 - Processing parameters  
 SI 32768  
 SF 400.1299991 MHz  
 WDW EM  
 SSB 0  
 LB 0.30 Hz  
 GB 0  
 PC 1.00

8.5 8.0 7.5 7.0 6.5 6.0 5.5 5.0 4.5 4.0 3.5 3.0 2.5 2.0 1.5 1.0 ppm

5.57  
0.92  
1.00  
4.12  
2.18  
2.09  
3.18  
3.28





Current Data Parameters  
NAME 090112  
EXPNO 12  
PROCNO 1

F2 - Acquisition Parameters  
Date\_ 20090113  
Time 6.34  
INSTRUM spect  
PROBHD 5 mm PABBO BB-  
PULPROG zgpg30  
TD 65536  
SOLVENT CDC13  
NS 2048  
DS 4  
SWH 24038.461 Hz  
FIDRES 0.366798 Hz  
AQ 1.3631988 sec  
RG 2050  
DW 20.800 usec  
DE 7.50 usec  
TE 295.0 K  
D1 2.00000000 sec  
d11 0.03000000 sec  
DELTA 1.89999998 sec  
TD0 1

==== CHANNEL f1 =====  
NUC1 13C  
P1 10.30 usec  
PL1 -3.00 dB  
SFO1 100.6228298 MHz

==== CHANNEL f2 =====  
CPDPRG2 waltz16  
NUC2 1H  
PCPD2 90.00 usec  
PL12 16.43 dB  
PL13 19.37 dB  
PL2 -3.00 dB  
SFO2 400.1316005 MHz

F2 - Processing parameters  
SI 32768  
SF 100.6127729 MHz  
WDW EM  
SSB 0  
LB 1.00 Hz  
GB 0  
PC 1.40

190.0  
167.0  
165.3  
153.9

134.7  
129.0  
128.3  
127.8

88.0  
77.3  
77.2  
77.0  
76.7  
62.5  
59.7  
56.1  
55.3  
54.0

14.3  
13.8

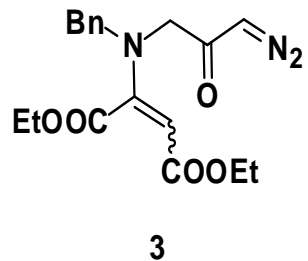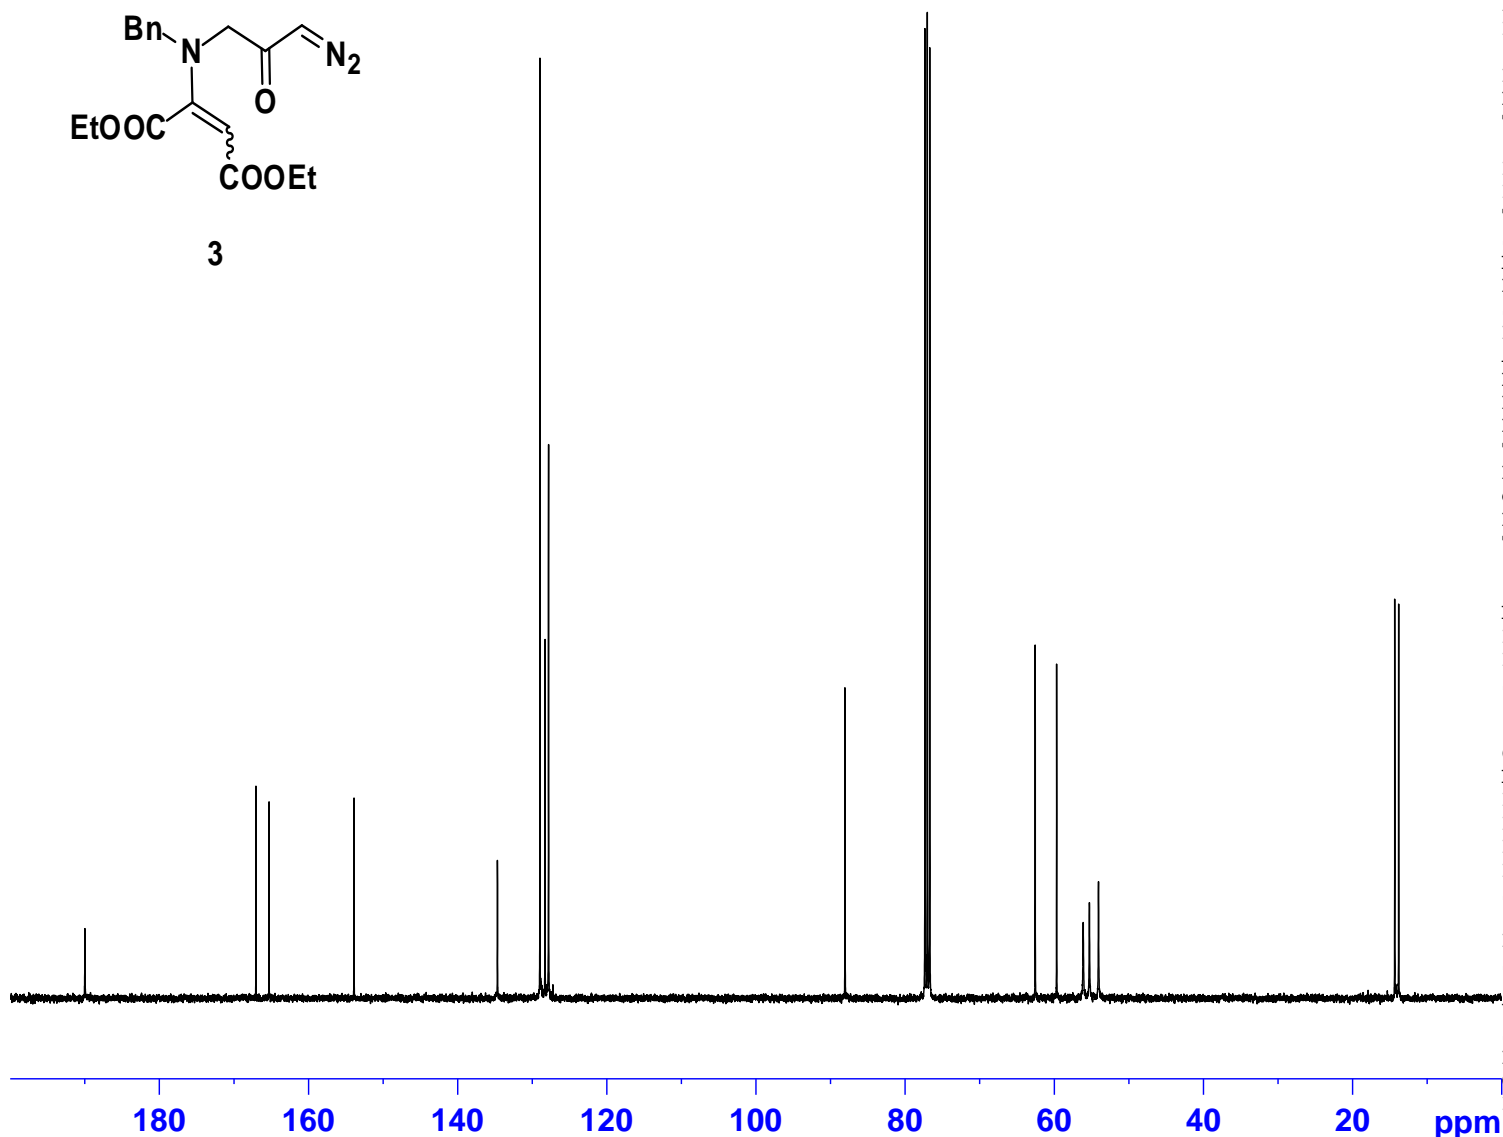



Current Data Parameters  
NAME 081011  
EXPNO 20  
PROCNO 1

F2 - Acquisition Parameters  
Date\_ 20081011  
Time 14.18  
INSTRUM spect  
PROBHD 5 mm PABBO BB-  
PULPROG zg30  
TD 65536  
SOLVENT CDC13  
NS 32  
DS 2  
SWH 8223.685 Hz  
FIDRES 0.125483 Hz  
AQ 3.9846387 sec  
RG 322  
DW 60.800 usec  
DE 6.50 usec  
TE 298.6 K  
D1 1.00000000 sec  
TD0 1

==== CHANNEL f1 =====  
NUC1 1H  
P1 9.61 usec  
PL1 -3.00 dB  
SFO1 400.1324710 MHz

F2 - Processing parameters  
SI 32768  
SF 400.1300028 MHz  
WDW EM  
SSB 0  
LB 0.30 Hz  
GB 0  
PC 1.00

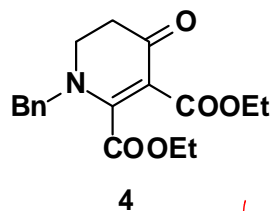

7.40  
7.38  
7.37  
7.36  
7.35  
7.33  
7.26

4.48  
4.42  
4.40  
4.39  
4.37  
4.28  
4.26  
4.24  
4.23  
3.52  
3.50  
3.48

2.47  
2.46  
2.44

1.35  
1.34  
1.33  
1.32  
1.31  
1.30

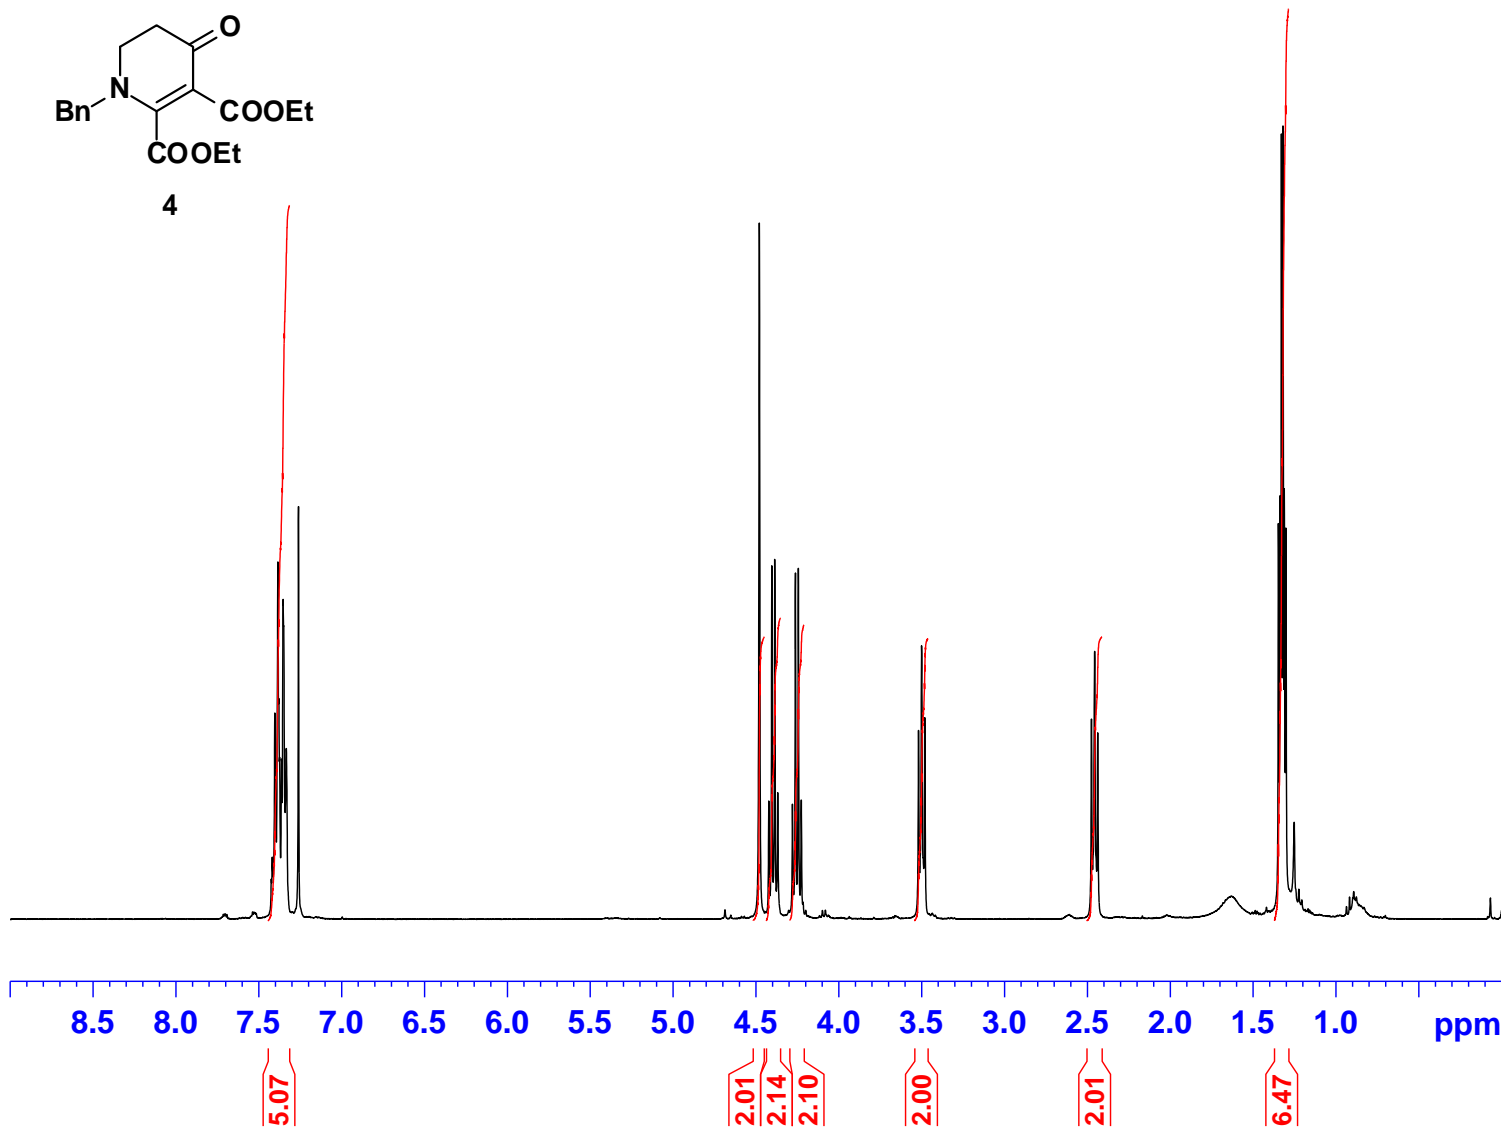



Current Data Parameters  
NAME 081011  
EXPNO 21  
PROCNO 1

F2 - Acquisition Parameters  
Date\_ 20081011  
Time 23.01  
INSTRUM spect  
PROBHD 5 mm PABBO BB-  
PULPROG zgpg30  
TD 65536  
SOLVENT CDC13  
NS 1024  
DS 4  
SWH 24038.461 Hz  
FIDRES 0.366798 Hz  
AQ 1.3631988 sec  
RG 2050  
DW 20.800 usec  
DE 7.50 usec  
TE 300.5 K  
D1 2.00000000 sec  
d11 0.03000000 sec  
DELTA 1.89999998 sec  
TD0 1

==== CHANNEL f1 =====  
NUC1 13C  
P1 10.30 usec  
PL1 -3.00 dB  
SFO1 100.6228298 MHz

==== CHANNEL f2 =====  
CPDPRG2 waltz16  
NUC2 1H  
PCPD2 90.00 usec  
PL12 16.43 dB  
PL13 19.37 dB  
PL2 -3.00 dB  
SFO2 400.1316005 MHz

F2 - Processing parameters  
SI 32768  
SF 100.6127692 MHz  
WDW EM  
SSB 0  
LB 1.00 Hz  
GB 0  
PC 1.40

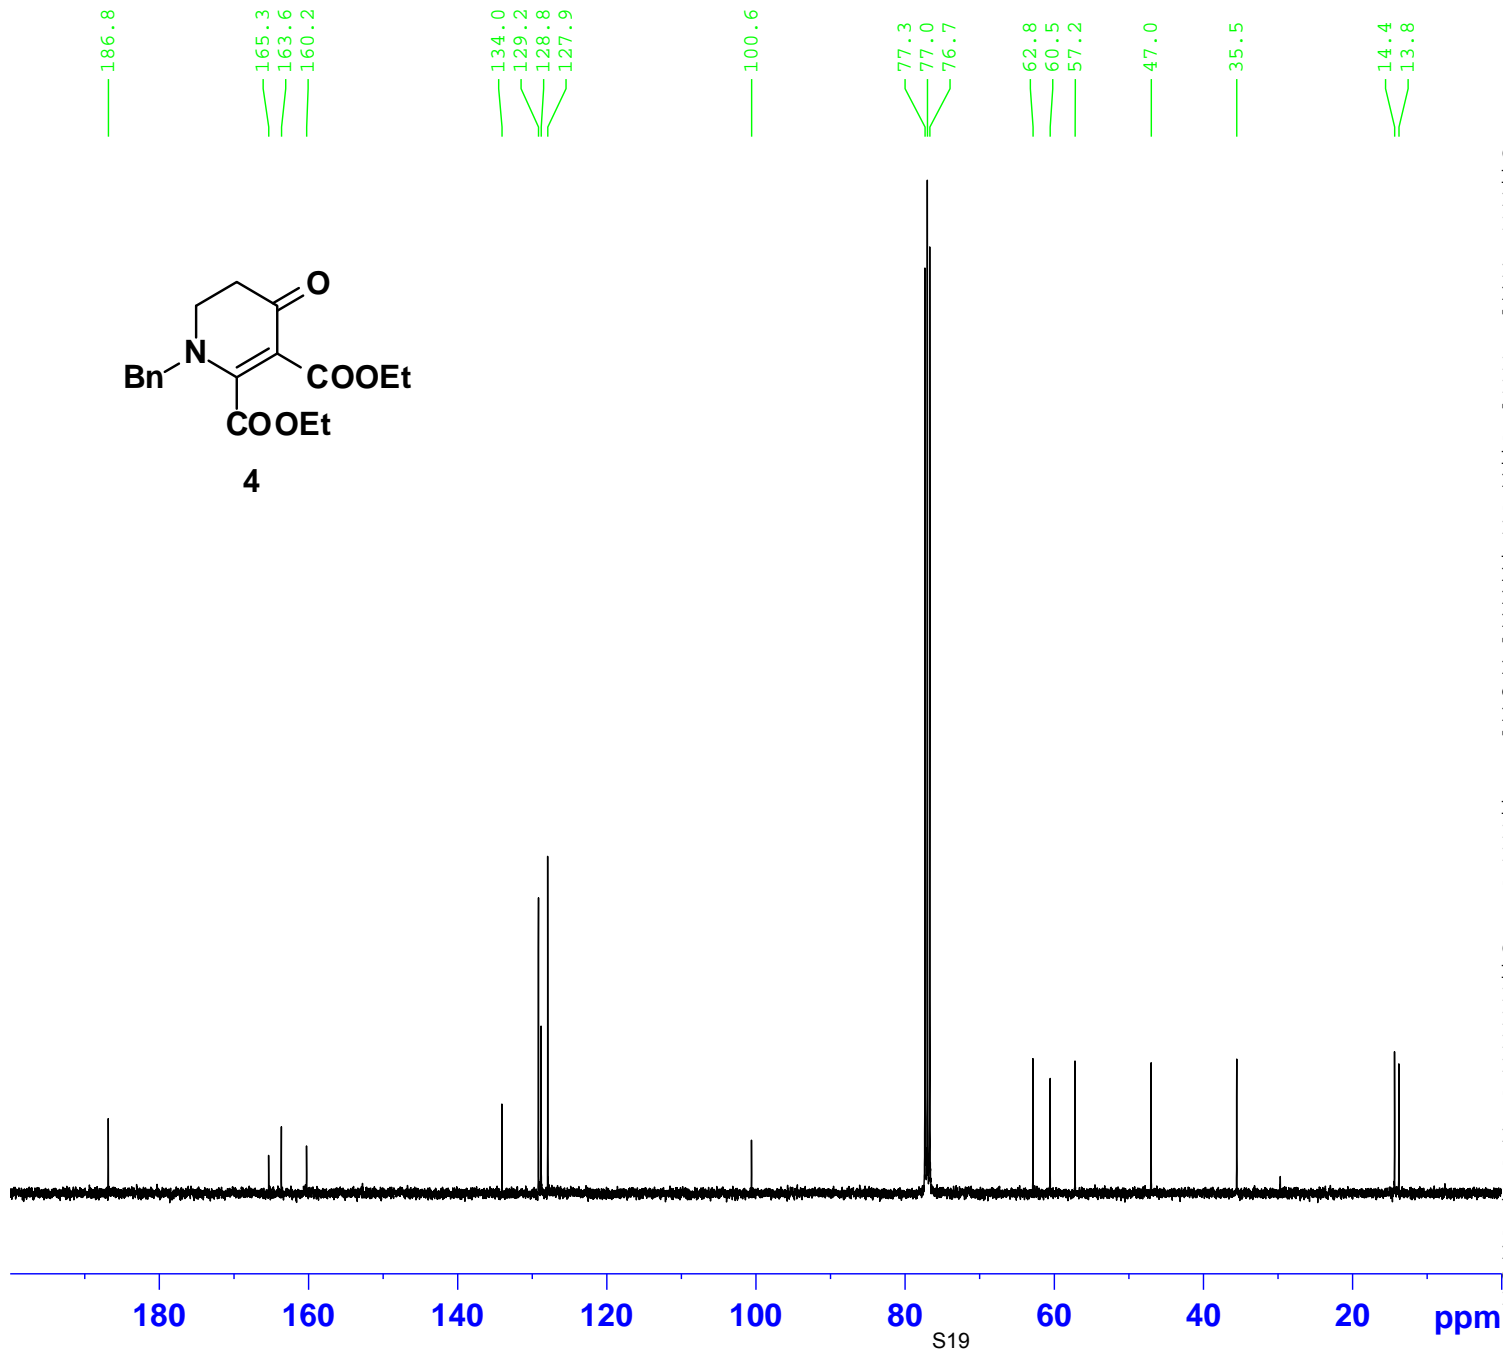

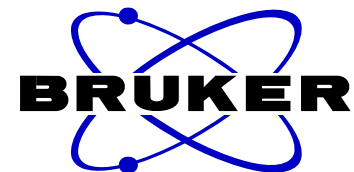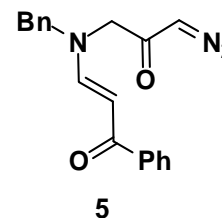

Current Data Parameters  
NAME 081014  
EXPNO 10  
PROCNO 1

F2 - Acquisition Parameters  
Date\_ 20081015  
Time 10.41  
INSTRUM spect  
PROBHD 5 mm PABBO BB-  
PULPROG zg30  
TD 65536  
SOLVENT CDCl3  
NS 32  
DS 2  
SWH 8223.685 Hz  
FIDRES 0.125483 Hz  
AQ 3.9846387 sec  
RG 228  
DW 60.800 usec  
DE 6.50 usec  
TE 294.8 K  
D1 1.00000000 sec  
TD0 1

==== CHANNEL f1 =====  
NUC1 1H  
P1 9.61 usec  
PL1 -3.00 dB  
SF01 400.1324710 MHz

F2 - Processing parameters  
SI 32768  
SF 400.1300033 MHz  
WDW EM  
SSB 0  
LB 0.30 Hz  
GB 0  
PC 1.00

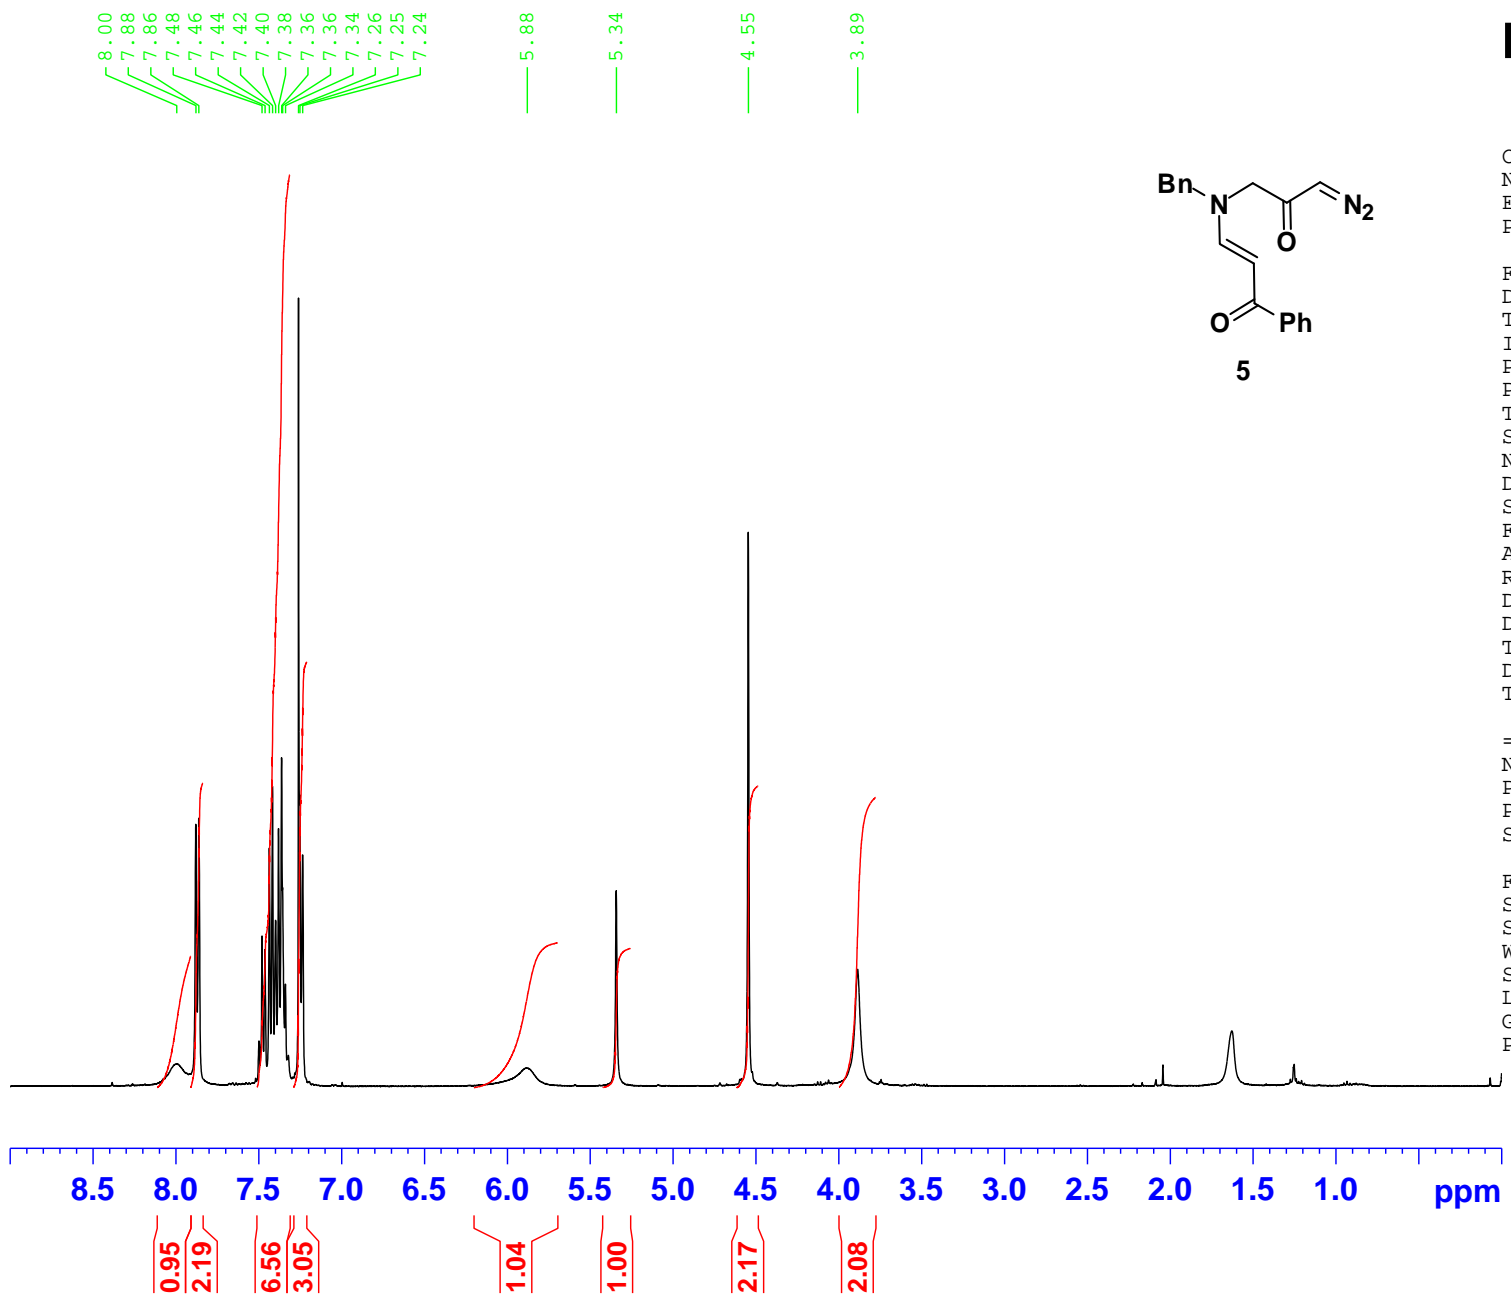



Current Data Parameters  
NAME 090121  
EXPNO 21  
PROCNO 1

F2 - Acquisition Parameters  
Date\_ 20090123  
Time 1.05  
INSTRUM spect  
PROBHD 5 mm PABBO BB-  
PULPROG zgpg30  
TD 65536  
SOLVENT CDC13  
NS 2048  
DS 4  
SWH 24038.461 Hz  
FIDRES 0.366798 Hz  
AQ 1.3631988 sec  
RG 1620  
DW 20.800 usec  
DE 7.50 usec  
TE 298.0 K  
D1 2.00000000 sec  
d11 0.03000000 sec  
DELTA 1.89999998 sec  
TD0 1

==== CHANNEL f1 =====  
NUC1 13C  
P1 10.30 usec  
PL1 -3.00 dB  
SFO1 100.6228298 MHz

==== CHANNEL f2 =====  
CPDPRG2 waltz16  
NUC2 1H  
PCPD2 90.00 usec  
PL12 16.43 dB  
PL13 19.37 dB  
PL2 -3.00 dB  
SFO2 400.1316005 MHz

F2 - Processing parameters  
SI 32768  
SF 100.6127751 MHz  
WDW EM  
SSB 0  
LB 1.00 Hz  
GB 0  
PC 1.40

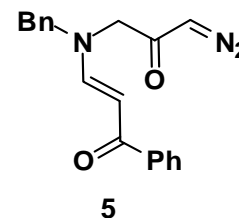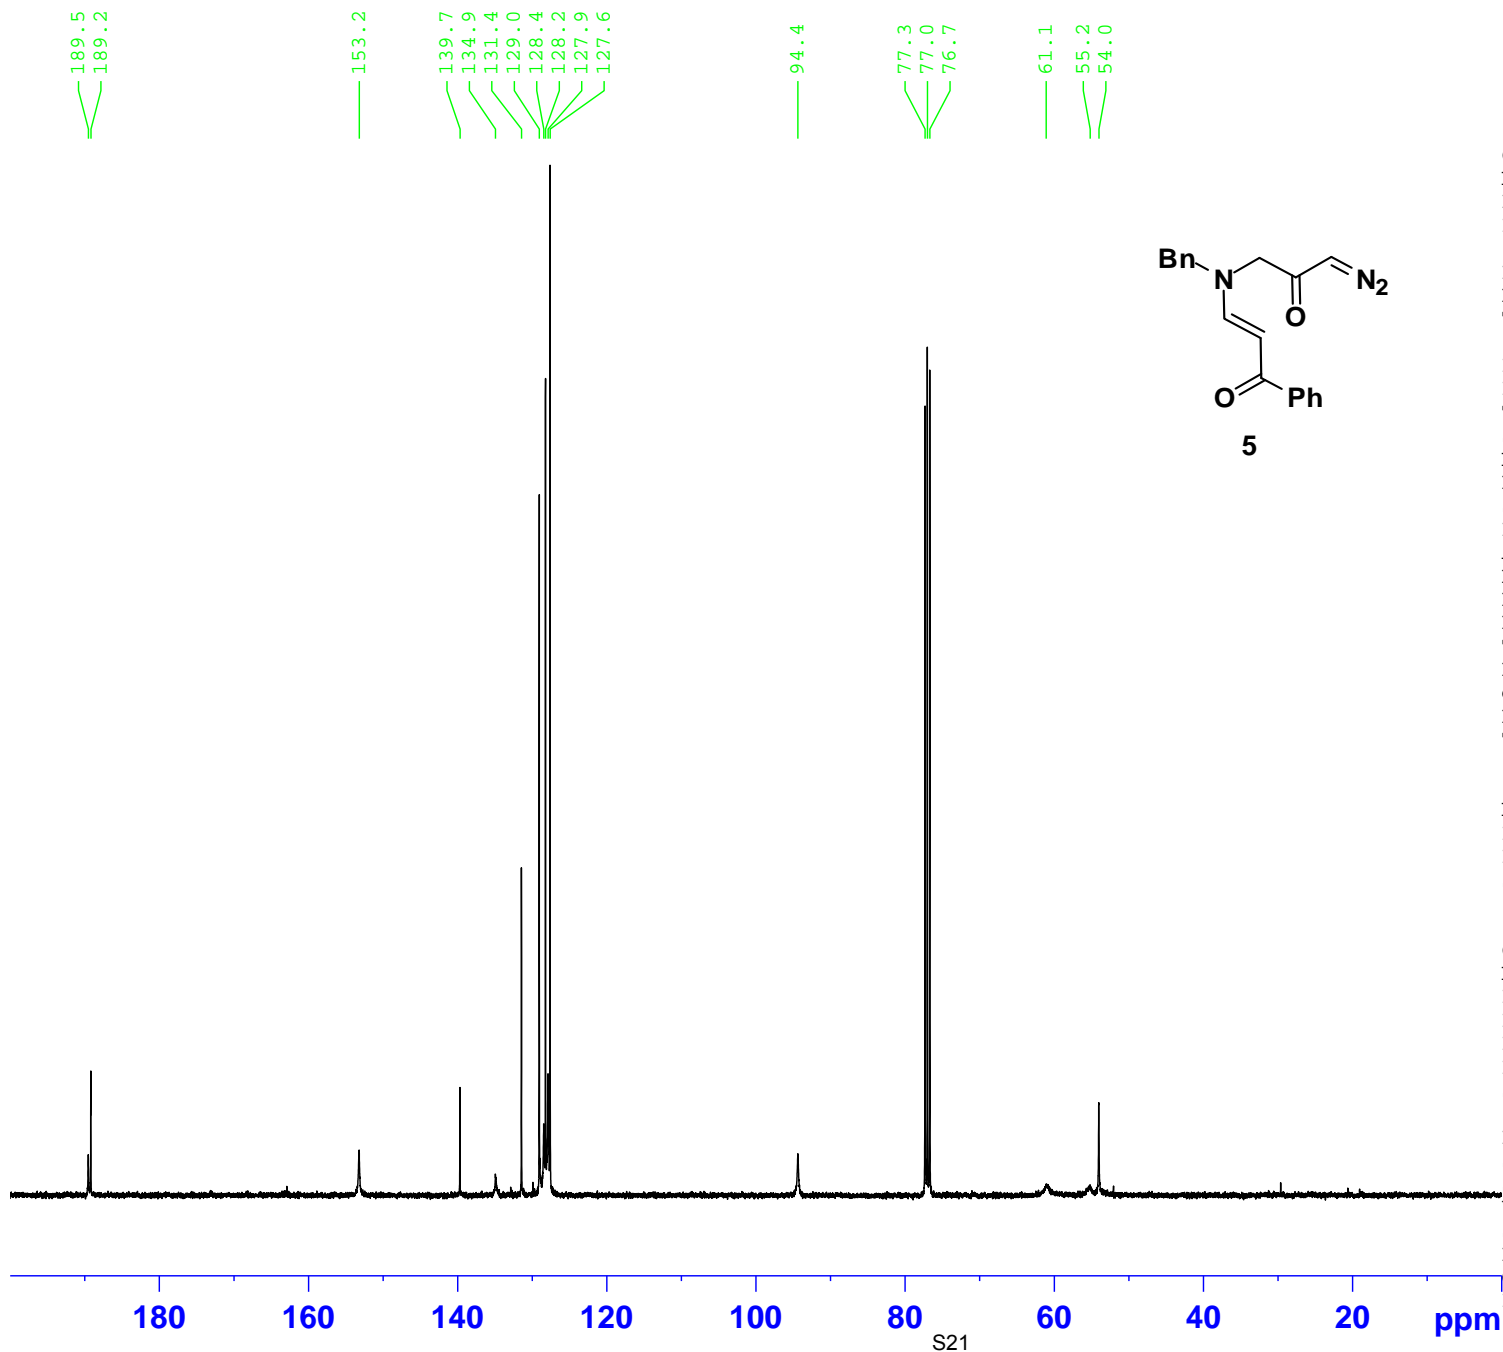



Current Data Parameters  
NAME 081202  
EXPNO 10  
PROCNO 1

F2 - Acquisition Parameters  
Date\_ 20081202  
Time 13.38  
INSTRUM spect  
PROBHD 5 mm PABBO BB-  
PULPROG zg30  
TD 65536  
SOLVENT CDC13  
NS 32  
DS 2  
SWH 8223.685 Hz  
FIDRES 0.125483 Hz  
AQ 3.9846387 sec  
RG 181  
DW 60.800 usec  
DE 6.50 usec  
TE 295.0 K  
D1 1.00000000 sec  
TD0 1

==== CHANNEL f1 =====  
NUC1 1H  
P1 9.61 usec  
PL1 -3.00 dB  
SFO1 400.1324710 MHz

F2 - Processing parameters  
SI 32768  
SF 400.1300028 MHz  
WDW EM  
SSB 0  
LB 0.30 Hz  
GB 0  
PC 1.00

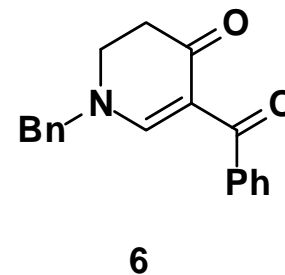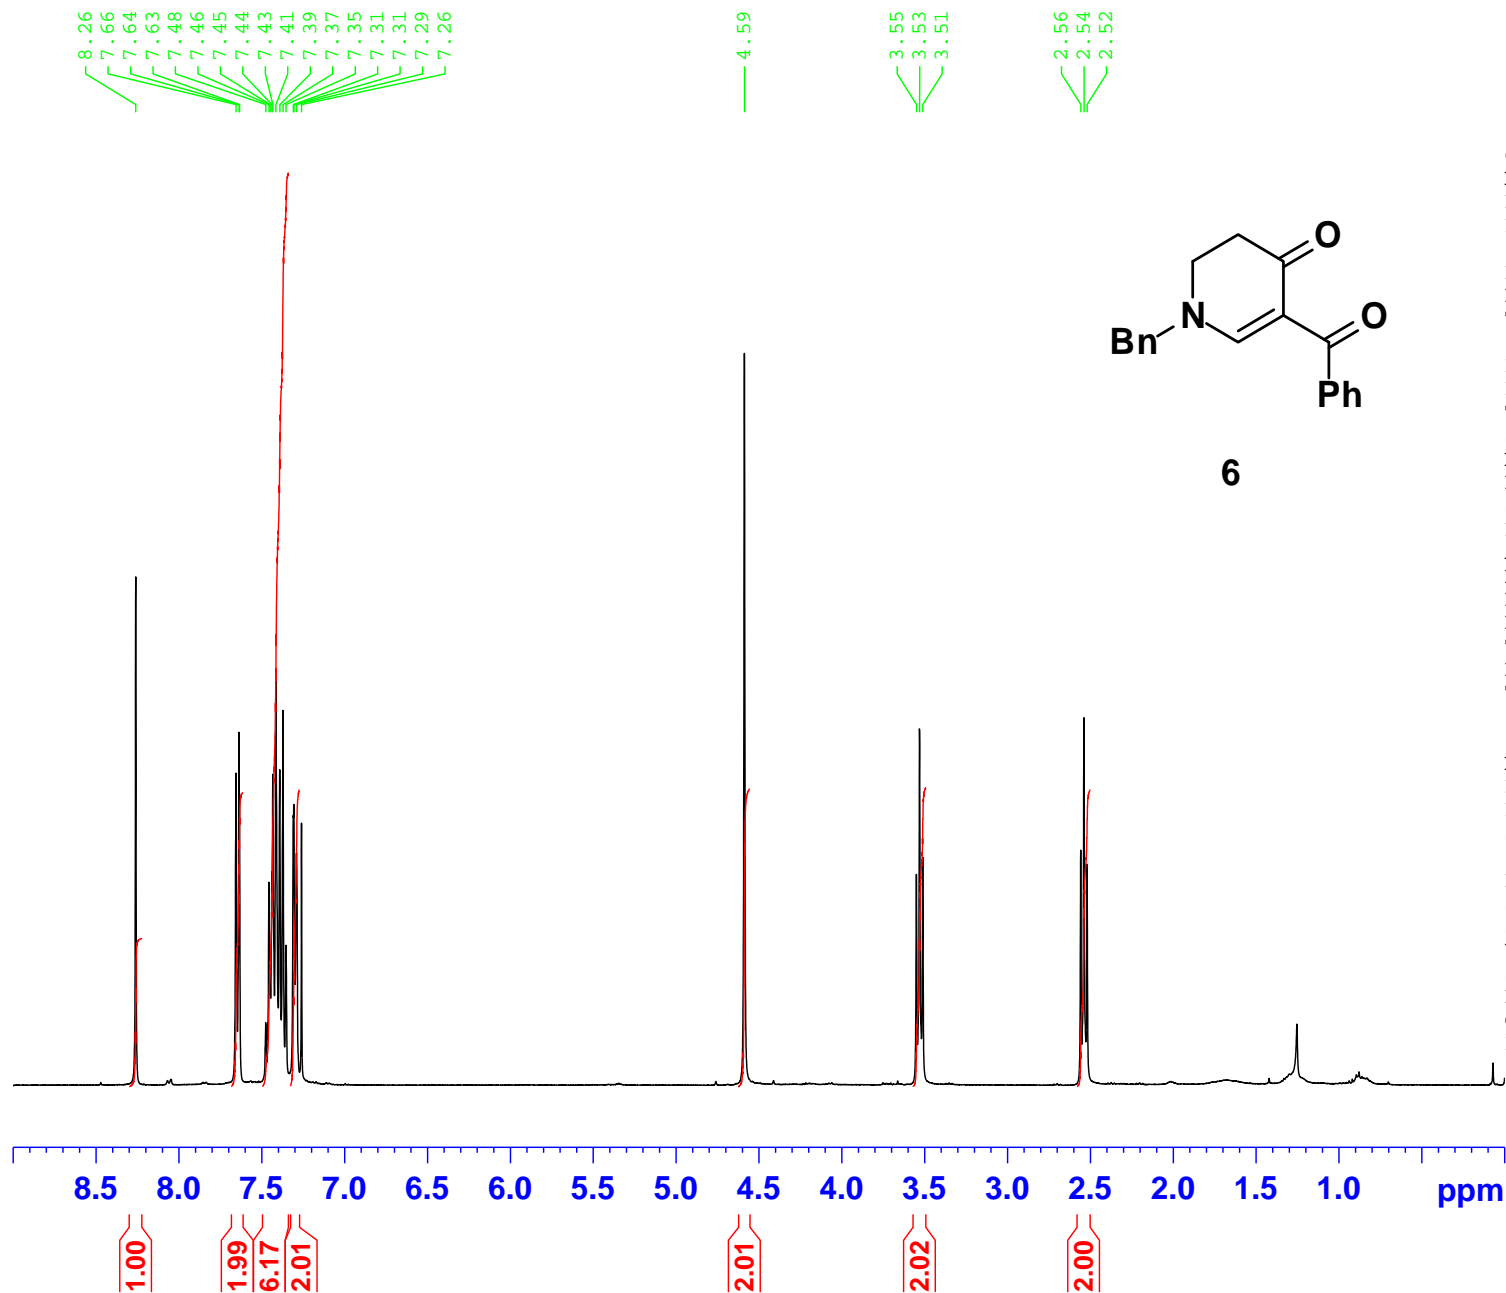

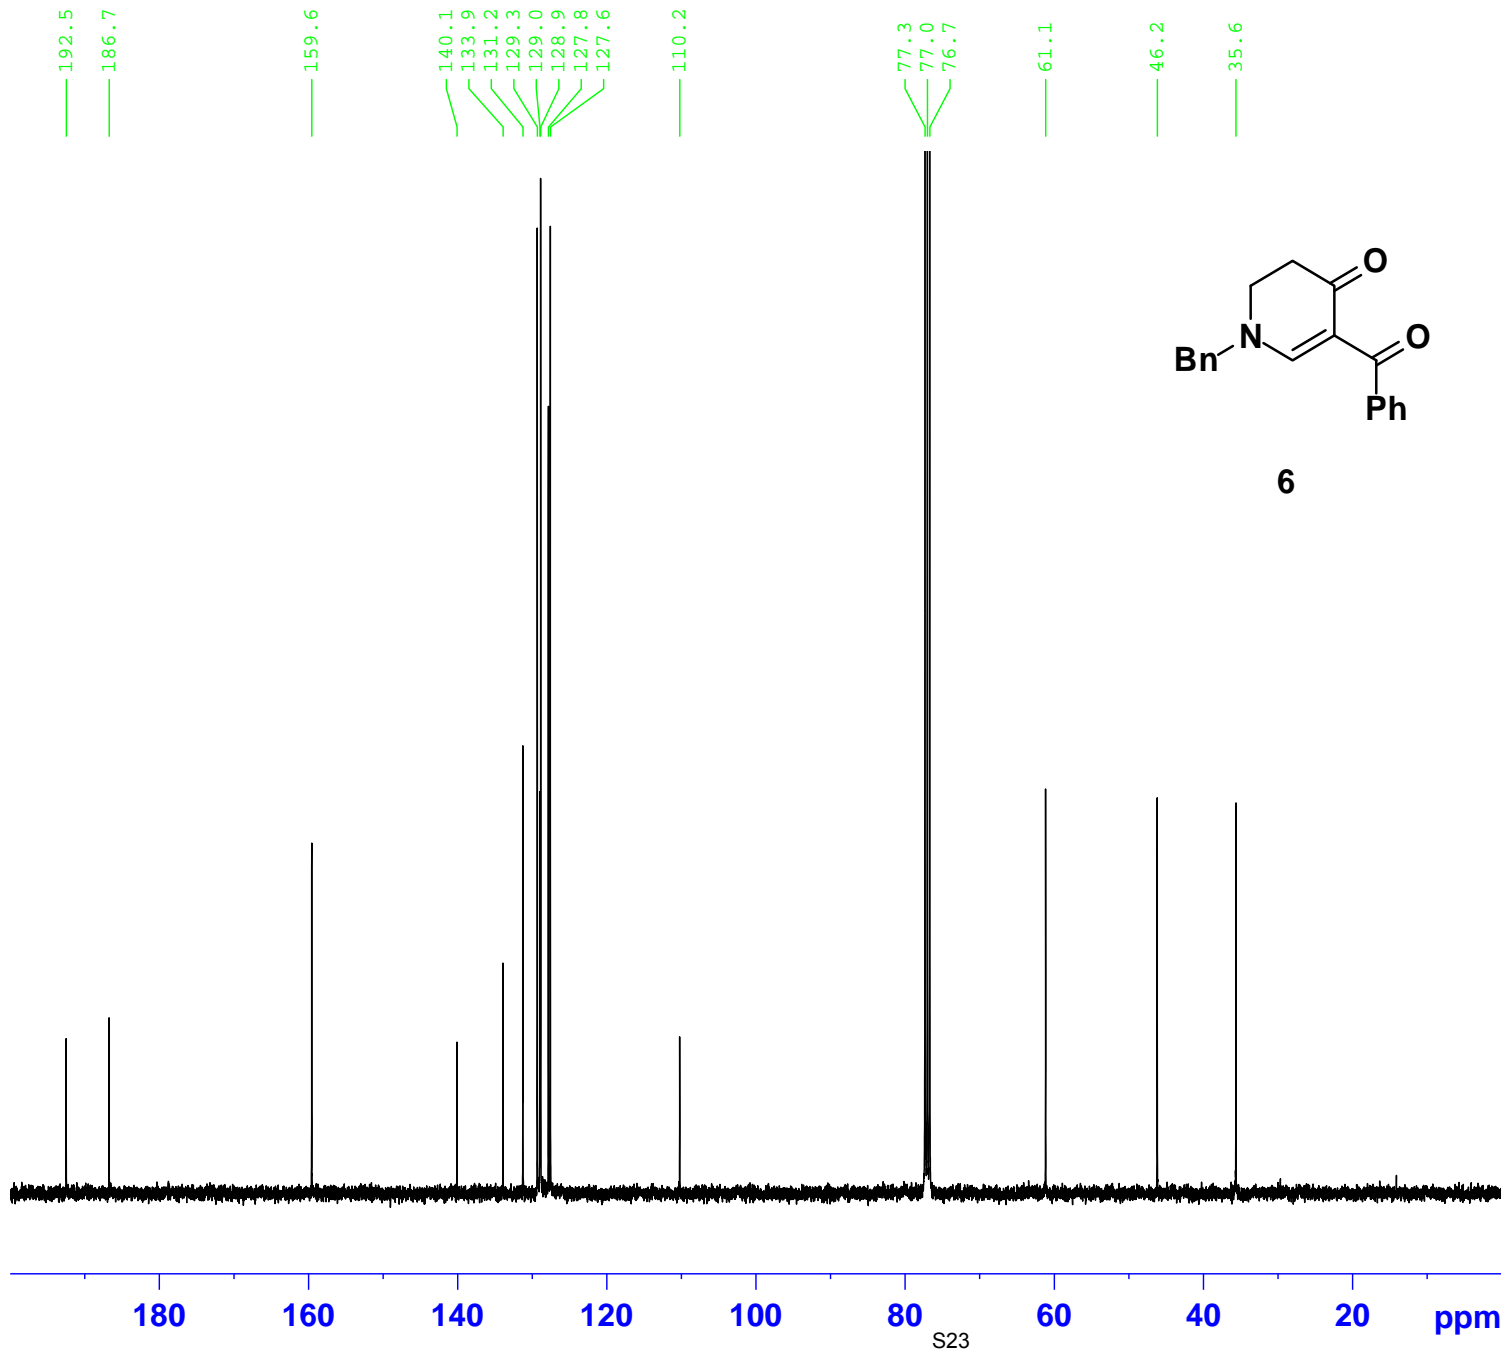

Current Data Parameters  
NAME 081202  
EXPNO 11  
PROCNO 1

F2 - Acquisition Parameters  
Date\_ 20081202  
Time 23.59  
INSTRUM spect  
PROBHD 5 mm PABBO BB-  
PULPROG zgpg30  
TD 65536  
SOLVENT CDC13  
NS 1024  
DS 4  
SWH 24038.461 Hz  
FIDRES 0.366798 Hz  
AQ 1.3631988 sec  
RG 2050  
DW 20.800 usec  
DE 7.50 usec  
TE 295.2 K  
D1 2.00000000 sec  
d11 0.03000000 sec  
DELTA 1.89999998 sec  
TD0 1

==== CHANNEL f1 =====  
NUC1 13C  
P1 10.30 usec  
PL1 -3.00 dB  
SFO1 100.6228298 MHz

==== CHANNEL f2 =====  
CPDPRG2 waltz16  
NUC2 1H  
PCPD2 90.00 usec  
PL12 16.43 dB  
PL13 19.37 dB  
PL2 -3.00 dB  
SFO2 400.1316005 MHz

F2 - Processing parameters  
SI 32768  
SF 100.6127729 MHz  
WDW EM  
SSB 0  
LB 1.00 Hz  
GB 0  
PC 1.40

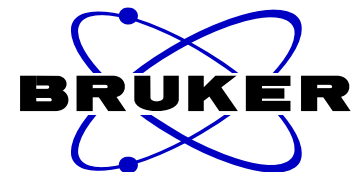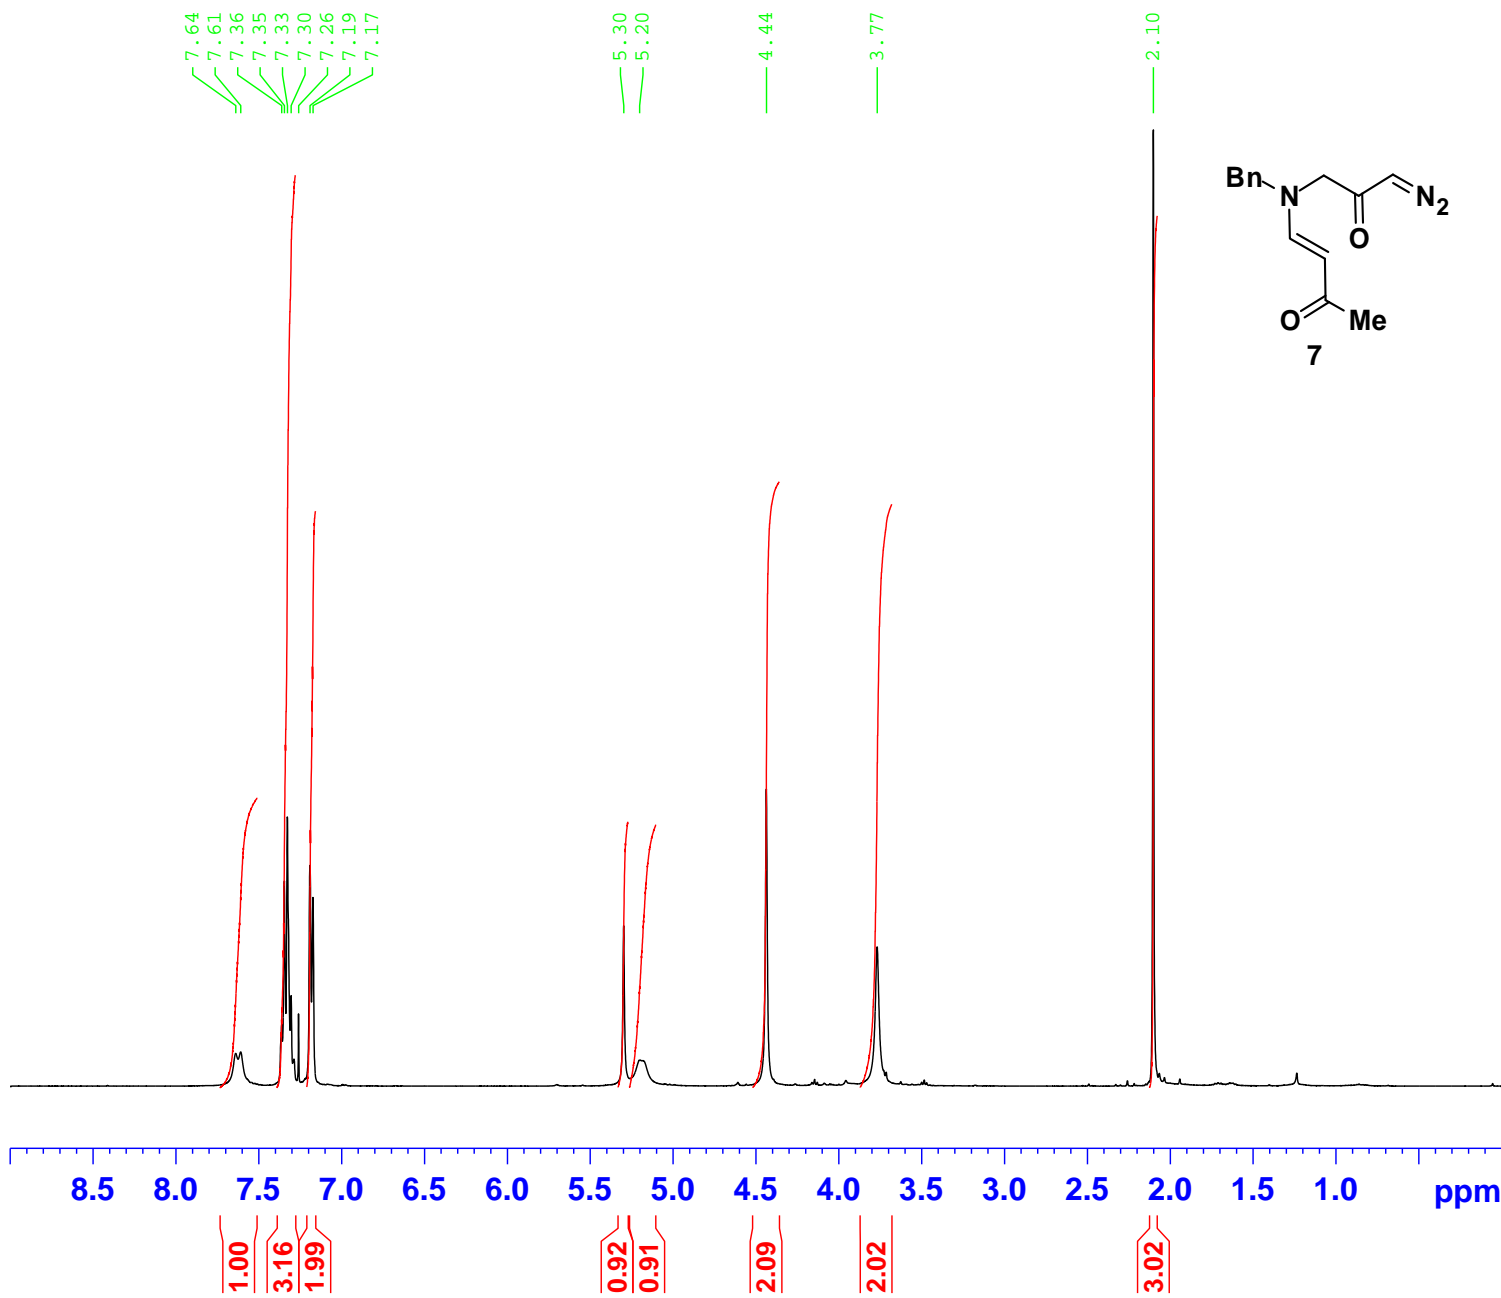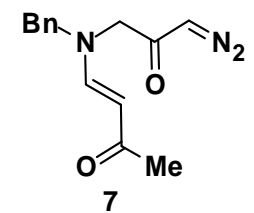

Current Data Parameters  
NAME 090121  
EXPNO 10  
PROCNO 1

F2 - Acquisition Parameters  
Date\_ 20090122  
Time 13.26  
INSTRUM spect  
PROBHD 5 mm PABBO BB-  
PULPROG zg30  
TD 65536  
SOLVENT CDC13  
NS 16  
DS 2  
SWH 8223.685 Hz  
FIDRES 0.125483 Hz  
AQ 3.9846387 sec  
RG 101  
DW 60.800 usec  
DE 6.50 usec  
TE 297.9 K  
D1 1.00000000 sec  
TD0 1

==== CHANNEL f1 =====  
NUC1 1H  
P1 9.61 usec  
PL1 -3.00 dB  
SFO1 400.1324710 MHz

F2 - Processing parameters  
SI 32768  
SF 400.1300026 MHz  
WDW EM  
SSB 0  
LB 0.30 Hz  
GB 0  
PC 1.00





195.9  
189.4  
151.5  
135.0  
129.0  
128.3  
127.8  
98.9  
77.3  
77.0  
76.7  
60.6  
54.9  
53.8  
28.5

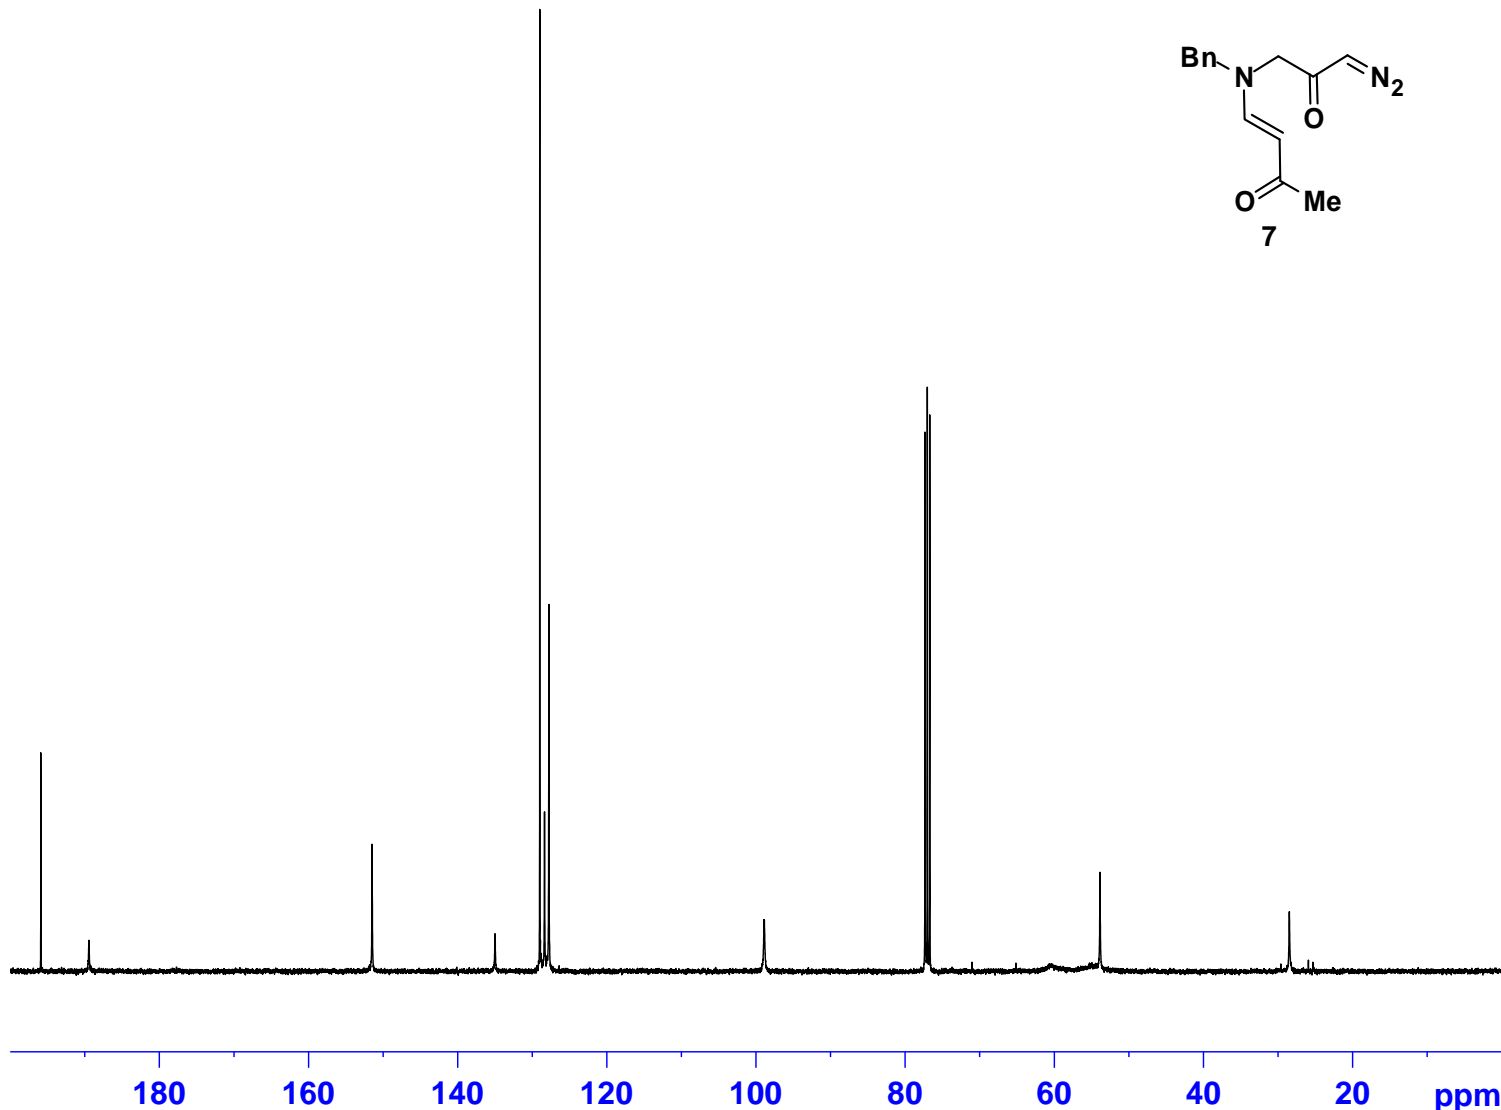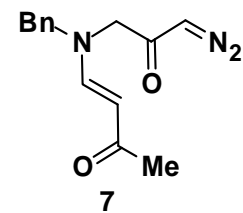

Current Data Parameters  
NAME 090121  
EXPNO 11  
PROCNO 1

F2 - Acquisition Parameters  
Date\_ 20090123  
Time 3.24  
INSTRUM spect  
PROBHD 5 mm PABBO BB-  
PULPROG zgpg30  
TD 65536  
SOLVENT CDC13  
NS 2048  
DS 4  
SWH 24038.461 Hz  
FIDRES 0.366798 Hz  
AQ 1.3631988 sec  
RG 1030  
DW 20.800 usec  
DE 7.50 usec  
TE 298.0 K  
D1 2.00000000 sec  
d11 0.03000000 sec  
DELTA 1.89999998 sec  
TD0 1

==== CHANNEL f1 =====  
NUC1 13C  
P1 10.30 usec  
PL1 -3.00 dB  
SFO1 100.6228298 MHz

==== CHANNEL f2 =====  
CPDPRG2 waltz16  
NUC2 1H  
PCPD2 90.00 usec  
PL12 16.43 dB  
PL13 19.37 dB  
PL2 -3.00 dB  
SFO2 400.1316005 MHz

F2 - Processing parameters  
SI 32768  
SF 100.6127758 MHz  
WDW EM  
SSB 0  
LB 1.00 Hz  
GB 0  
PC 1.40



Current Data Parameters  
NAME 081019  
EXPNO 21  
PROCNO 1

F2 - Acquisition Parameters  
Date\_ 20081020  
Time 3.42  
INSTRUM spect  
PROBHD 5 mm PABBO BB-  
PULPROG zg30  
TD 65536  
SOLVENT CDC13  
NS 16  
DS 2  
SWH 8223.685 Hz  
FIDRES 0.125483 Hz  
AQ 3.9846387 sec  
RG 203  
DW 60.800 usec  
DE 6.50 usec  
TE 294.7 K  
D1 1.00000000 sec  
TD0 1

==== CHANNEL f1 =====  
NUC1 1H  
P1 9.61 usec  
PL1 -3.00 dB  
SFO1 400.1324710 MHz

F2 - Processing parameters  
SI 32768  
SF 400.1300035 MHz  
WDW EM  
SSB 0  
LB 0.30 Hz  
GB 0  
PC 1.00

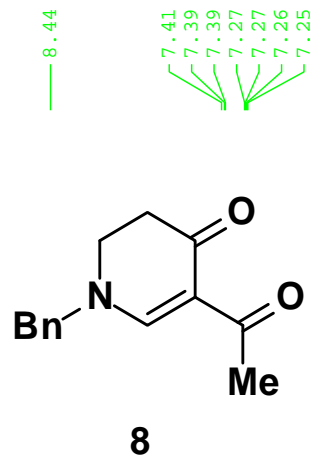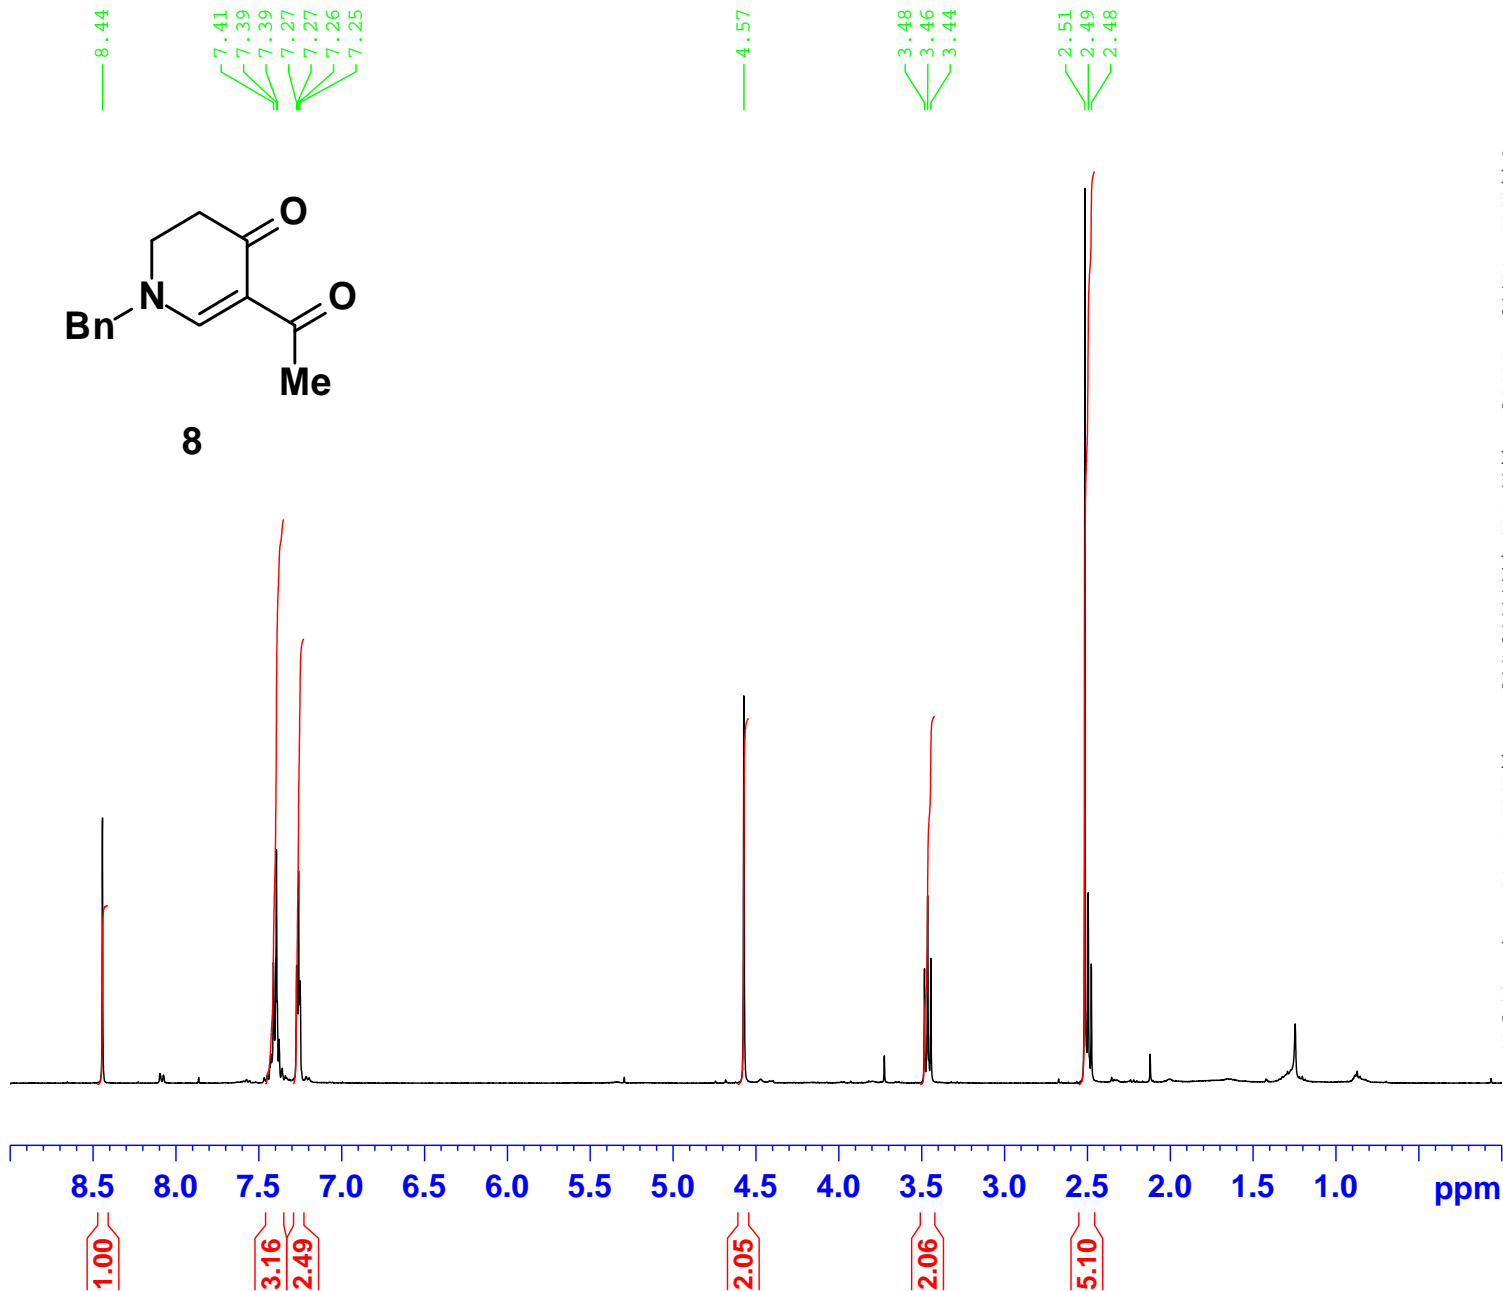



Current Data Parameters  
NAME 081019  
EXPNO 22  
PROCNO 1

F2 - Acquisition Parameters  
Date\_ 20081020  
Time 4.42  
INSTRUM spect  
PROBHD 5 mm PABBO BB-  
PULPROG zgpg30  
TD 65536  
SOLVENT CDC13  
NS 1024  
DS 4  
SWH 24038.461 Hz  
FIDRES 0.366798 Hz  
AQ 1.3631988 sec  
RG 2050  
DW 20.800 usec  
DE 7.50 usec  
TE 295.2 K  
D1 2.00000000 sec  
d11 0.03000000 sec  
DELTA 1.89999998 sec  
TD0 1

=====  
CHANNEL f1  
NUC1 13C  
P1 10.30 usec  
PL1 -3.00 dB  
SFO1 100.6228298 MHz

=====  
CHANNEL f2  
CPDPRG2 waltz16  
NUC2 1H  
PCPD2 90.00 usec  
PL12 16.43 dB  
PL13 19.37 dB  
PL2 -3.00 dB  
SFO2 400.1316005 MHz

F2 - Processing parameters  
SI 32768  
SF 100.6127714 MHz  
WDW EM  
SSB 0  
LB 1.00 Hz  
GB 0  
PC 1.40

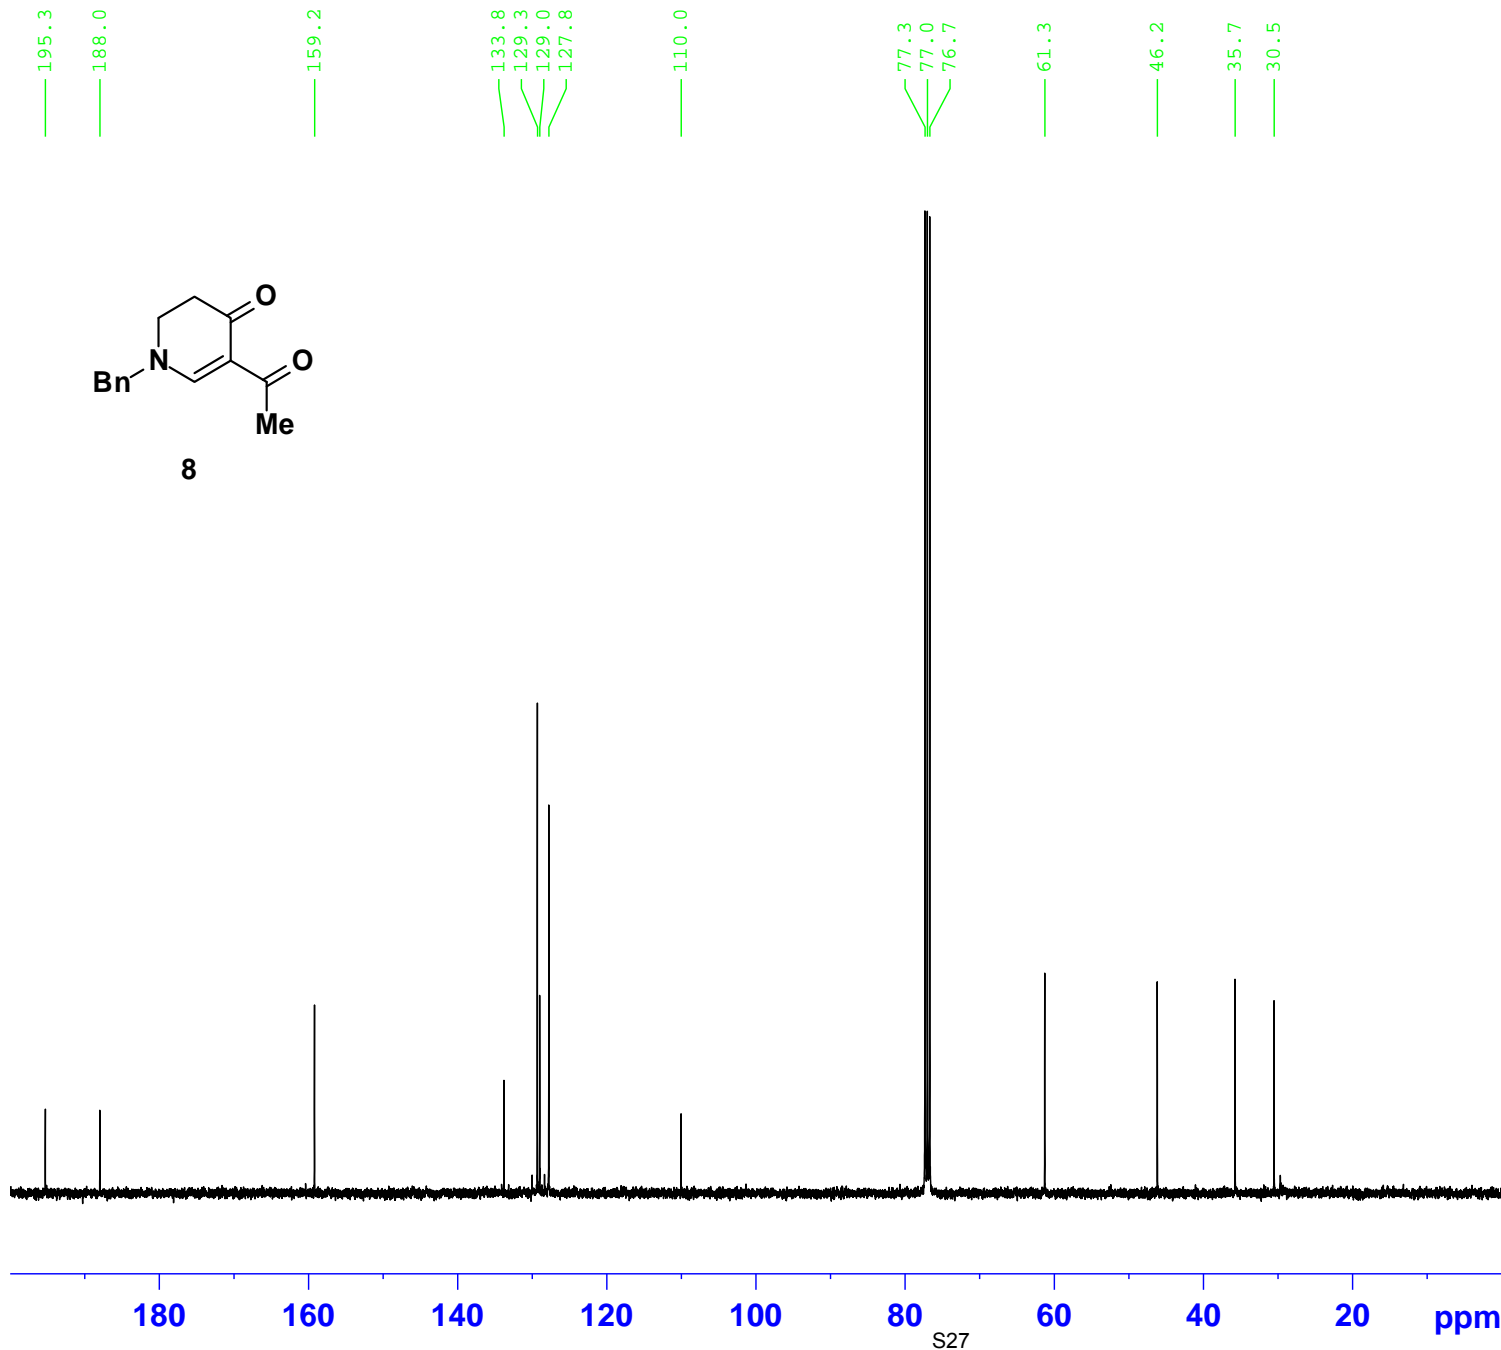



Current Data Parameters  
 NAME 090111  
 EXPNO 20  
 PROCNO 1

F2 - Acquisition Parameters  
 Date\_ 20090111  
 Time 14.57  
 INSTRUM spect  
 PROBHD 5 mm PABBO BB-  
 PULPROG zg30  
 TD 65536  
 SOLVENT CDC13  
 NS 16  
 DS 2  
 SWH 8223.685 Hz  
 FIDRES 0.125483 Hz  
 AQ 3.9846387 sec  
 RG 71.8  
 DW 60.800 usec  
 DE 6.50 usec  
 TE 300.0 K  
 D1 1.00000000 sec  
 TD0 1

===== CHANNEL f1 =====  
 NUC1 1H  
 P1 9.61 usec  
 PL1 -3.00 dB  
 SFO1 400.1324710 MHz

F2 - Processing parameters  
 SI 32768  
 SF 400.1300023 MHz  
 WDW EM  
 SSB 0  
 LB 0.30 Hz  
 GB 0  
 PC 1.00

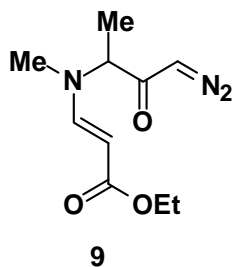

7.48  
7.45  
7.26

5.35

4.68  
4.65  
4.13  
4.11  
4.10  
4.08  
3.91  
3.89

2.70

1.38  
1.37  
1.25  
1.23  
1.21

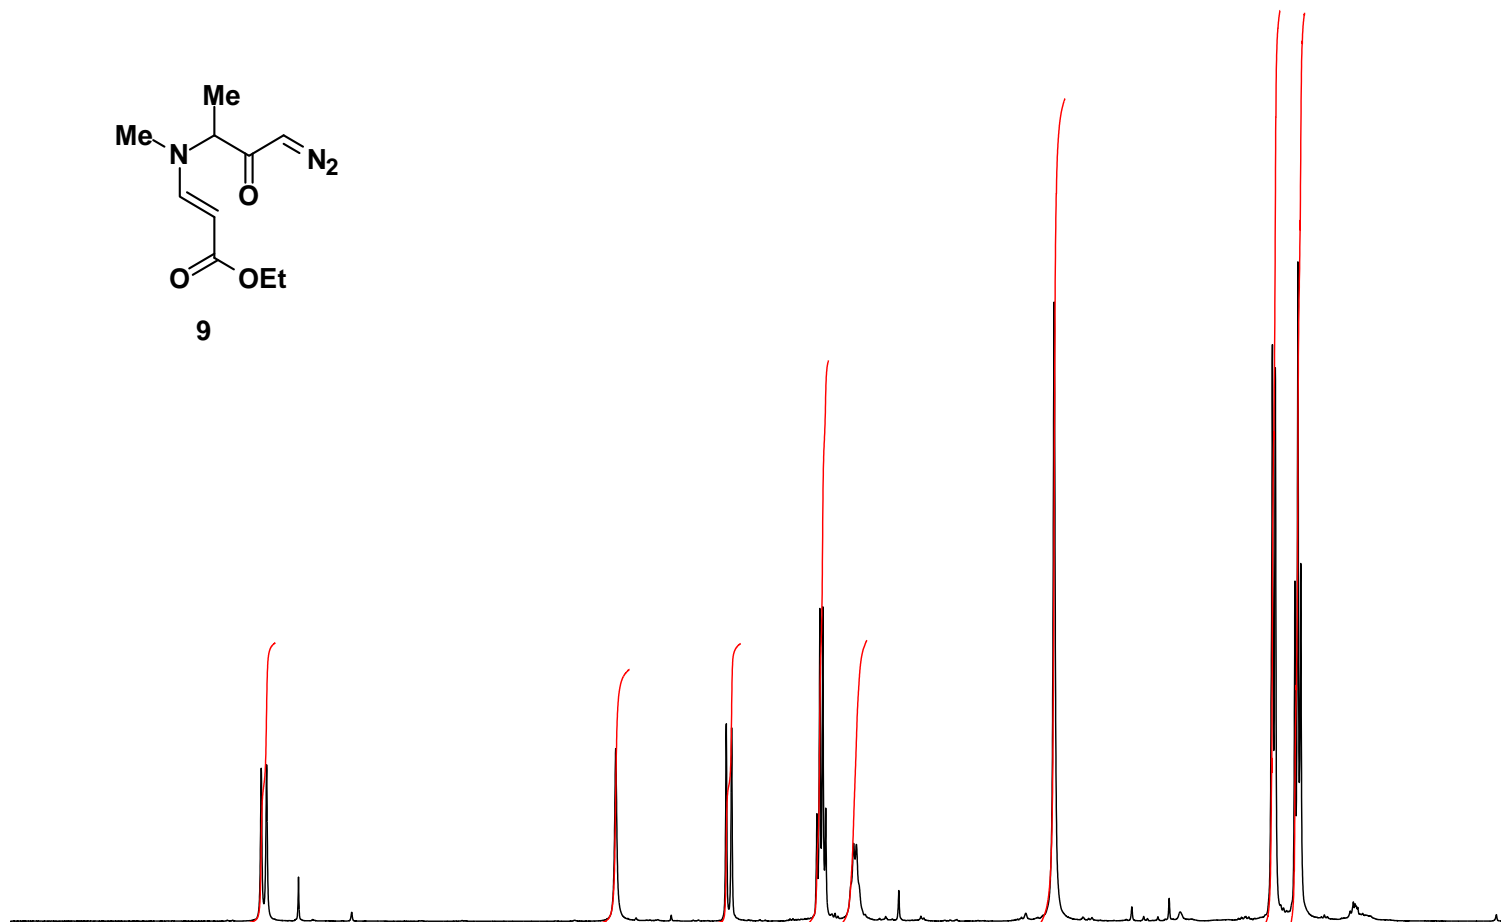

8.5 8.0 7.5 7.0 6.5 6.0 5.5 5.0 4.5 4.0 3.5 3.0 2.5 2.0 1.5 1.0 ppm

1.00

0.91

1.00

2.01

1.01

2.94

3.26

3.25



Current Data Parameters  
NAME 090111  
EXPNO 21  
PROCNO 1

F2 - Acquisition Parameters  
Date\_ 20090112  
Time 1.05  
INSTRUM spect  
PROBHD 5 mm PABBO BB-  
PULPROG zgpg30  
TD 65536  
SOLVENT CDC13  
NS 2048  
DS 4  
SWH 24038.461 Hz  
FIDRES 0.366798 Hz  
AQ 1.3631988 sec  
RG 2050  
DW 20.800 usec  
DE 7.50 usec  
TE 294.9 K  
D1 2.00000000 sec  
d11 0.03000000 sec  
DELTA 1.89999998 sec  
TD0 1

==== CHANNEL f1 =====  
NUC1 13C  
P1 10.30 usec  
PL1 -3.00 dB  
SFO1 100.6228298 MHz

==== CHANNEL f2 =====  
CPDPRG2 waltz16  
NUC2 1H  
PCPD2 90.00 usec  
PL12 16.43 dB  
PL13 19.37 dB  
PL2 -3.00 dB  
SFO2 400.1316005 MHz

F2 - Processing parameters  
SI 32768  
SF 100.6127758 MHz  
WDW EM  
SSB 0  
LB 1.00 Hz  
GB 0  
PC 1.40

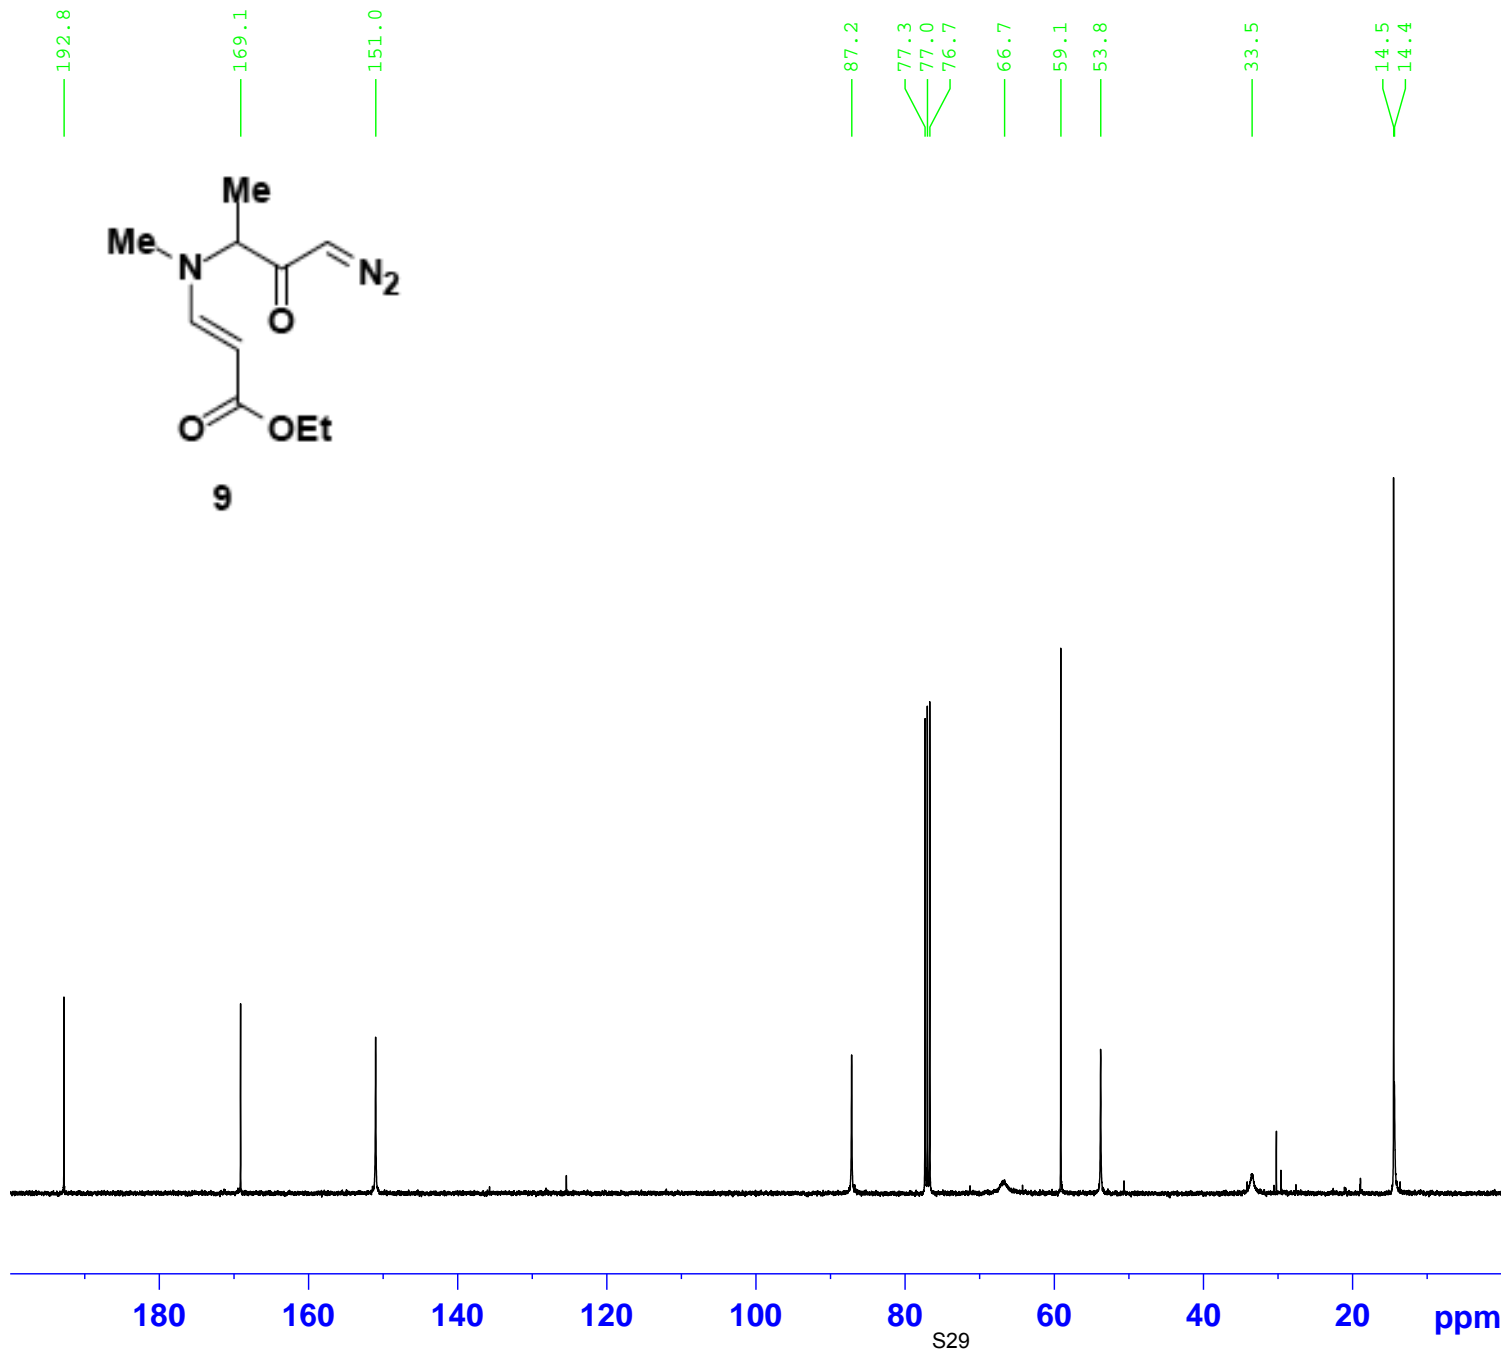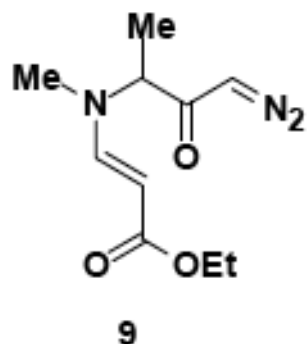

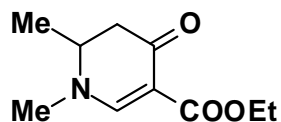

10

8.02

7.26

4.24  
4.22  
4.20  
4.19  
3.67  
3.66  
3.65  
3.64  
3.63  
3.22  
2.82  
2.80  
2.78  
2.76  
2.29  
2.28  
2.25  
2.24  
1.31  
1.29  
1.27  
1.26  
1.24

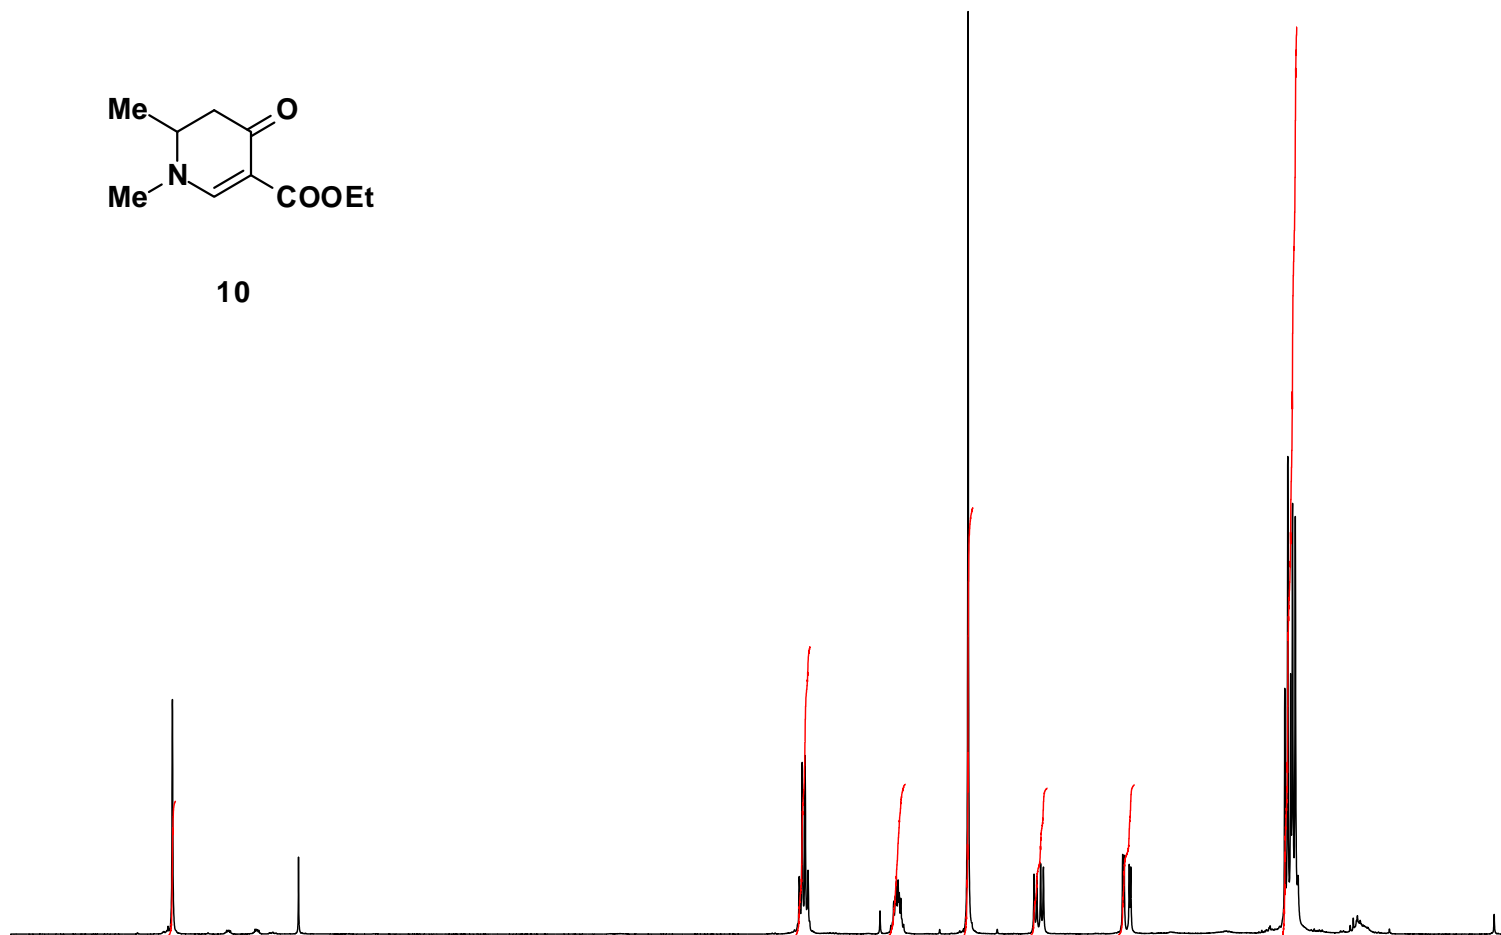

Current Data Parameters  
NAME 090111  
EXPNO 10  
PROCNO 1

F2 - Acquisition Parameters  
Date\_ 20090111  
Time 13.49  
INSTRUM spect  
PROBHD 5 mm PABBO BB-  
PULPROG zg30  
TD 65536  
SOLVENT CDC13  
NS 16  
DS 2  
SWH 8223.685 Hz  
FIDRES 0.125483 Hz  
AQ 3.9846387 sec  
RG 128  
DW 60.800 usec  
DE 6.50 usec  
TE 294.9 K  
D1 1.00000000 sec  
TD0 1

==== CHANNEL f1 =====  
NUC1 1H  
P1 9.61 usec  
PL1 -3.00 dB  
SFO1 400.1324710 MHz

F2 - Processing parameters  
SI 32768  
SF 400.1300028 MHz  
WDW EM  
SSB 0  
LB 0.30 Hz  
GB 0  
PC 1.00

1.00

2.15

1.12

3.17

1.09

1.12

6.77



185.9  
165.4  
158.5

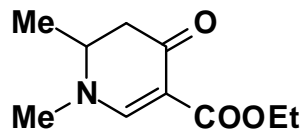

10

99.6

77.3  
77.0  
76.7

59.8  
54.7

42.7  
42.1

15.5  
14.5

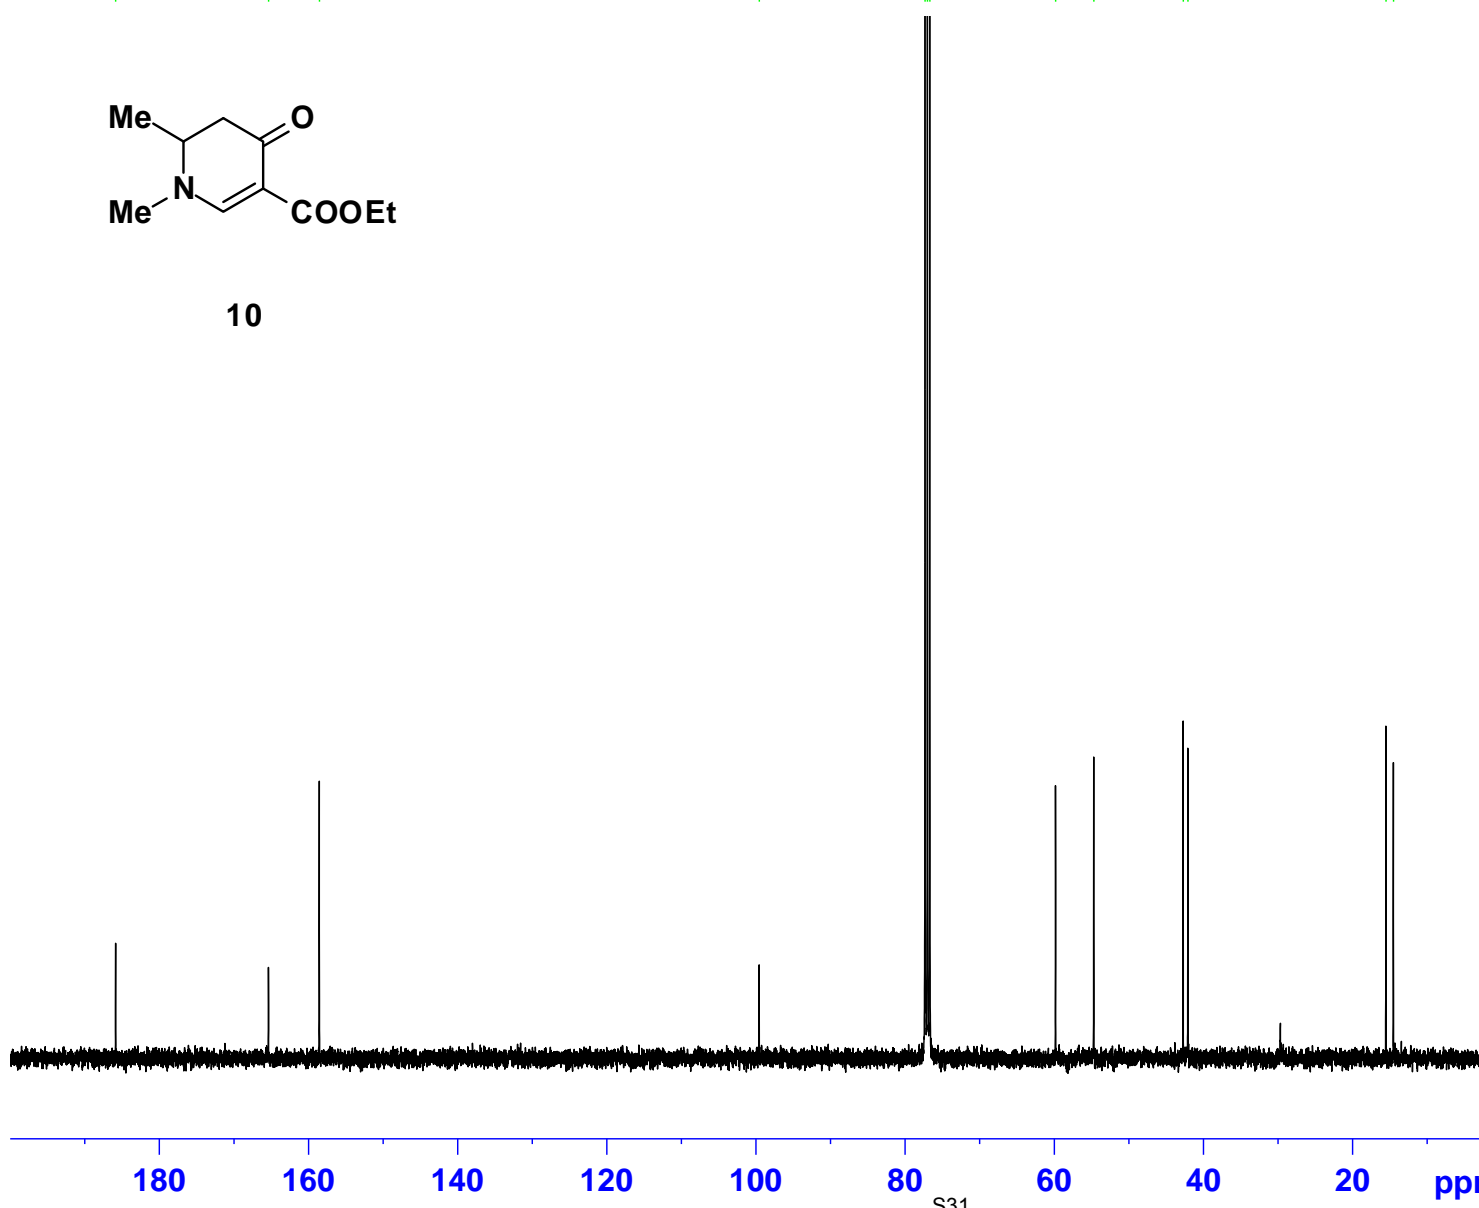

Current Data Parameters  
NAME 090108  
EXPNO 22  
PROCNO 1

F2 - Acquisition Parameters  
Date\_ 20090109  
Time 0.04  
INSTRUM spect  
PROBHD 5 mm PABBO BB-  
PULPROG zgpg30  
TD 65536  
SOLVENT CDC13  
NS 1024  
DS 4  
SWH 24038.461 Hz  
FIDRES 0.366798 Hz  
AQ 1.3631988 sec  
RG 2050  
DW 20.800 usec  
DE 7.50 usec  
TE 295.2 K  
D1 2.00000000 sec  
d11 0.03000000 sec  
DELTA 1.89999998 sec  
TD0 1

==== CHANNEL f1 =====  
NUC1 13C  
P1 10.30 usec  
PL1 -3.00 dB  
SFO1 100.6228298 MHz

==== CHANNEL f2 =====  
CPDPRG2 waltz16  
NUC2 1H  
PCPD2 90.00 usec  
PL12 16.43 dB  
PL13 19.37 dB  
PL2 -3.00 dB  
SFO2 400.1316005 MHz

F2 - Processing parameters  
SI 32768  
SF 100.6127714 MHz  
WDW EM  
SSB 0  
LB 1.00 Hz  
GB 0  
PC 1.40

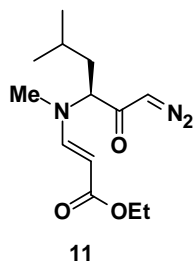

7.48  
7.45  
7.26

5.32

4.70  
4.66

4.15  
4.13  
4.11  
4.10  
3.79

2.70

1.73  
1.70  
1.69  
1.68  
1.65  
1.51  
1.50  
1.49  
1.48  
1.26  
1.25  
1.23  
0.93  
0.92  
0.89  
0.87

Current Data Parameters  
 NAME 090113  
 EXPNO 10  
 PROCNO 1

F2 - Acquisition Parameters  
 Date\_ 20090113  
 Time 17.16  
 INSTRUM spect  
 PROBHD 5 mm PABBO BB-  
 PULPROG zg30  
 TD 65536  
 SOLVENT CDC13  
 NS 16  
 DS 2  
 SWH 8223.685 Hz  
 FIDRES 0.125483 Hz  
 AQ 3.9846387 sec  
 RG 80.6  
 DW 60.800 usec  
 DE 6.50 usec  
 TE 294.8 K  
 D1 1.00000000 sec  
 TD0 1

==== CHANNEL f1 =====  
 NUC1 1H  
 P1 9.61 usec  
 PL1 -3.00 dB  
 SFO1 400.1324710 MHz

F2 - Processing parameters  
 SI 32768  
 SF 400.1300033 MHz  
 WDW EM  
 SSB 0  
 LB 0.30 Hz  
 GB 0  
 PC 1.00

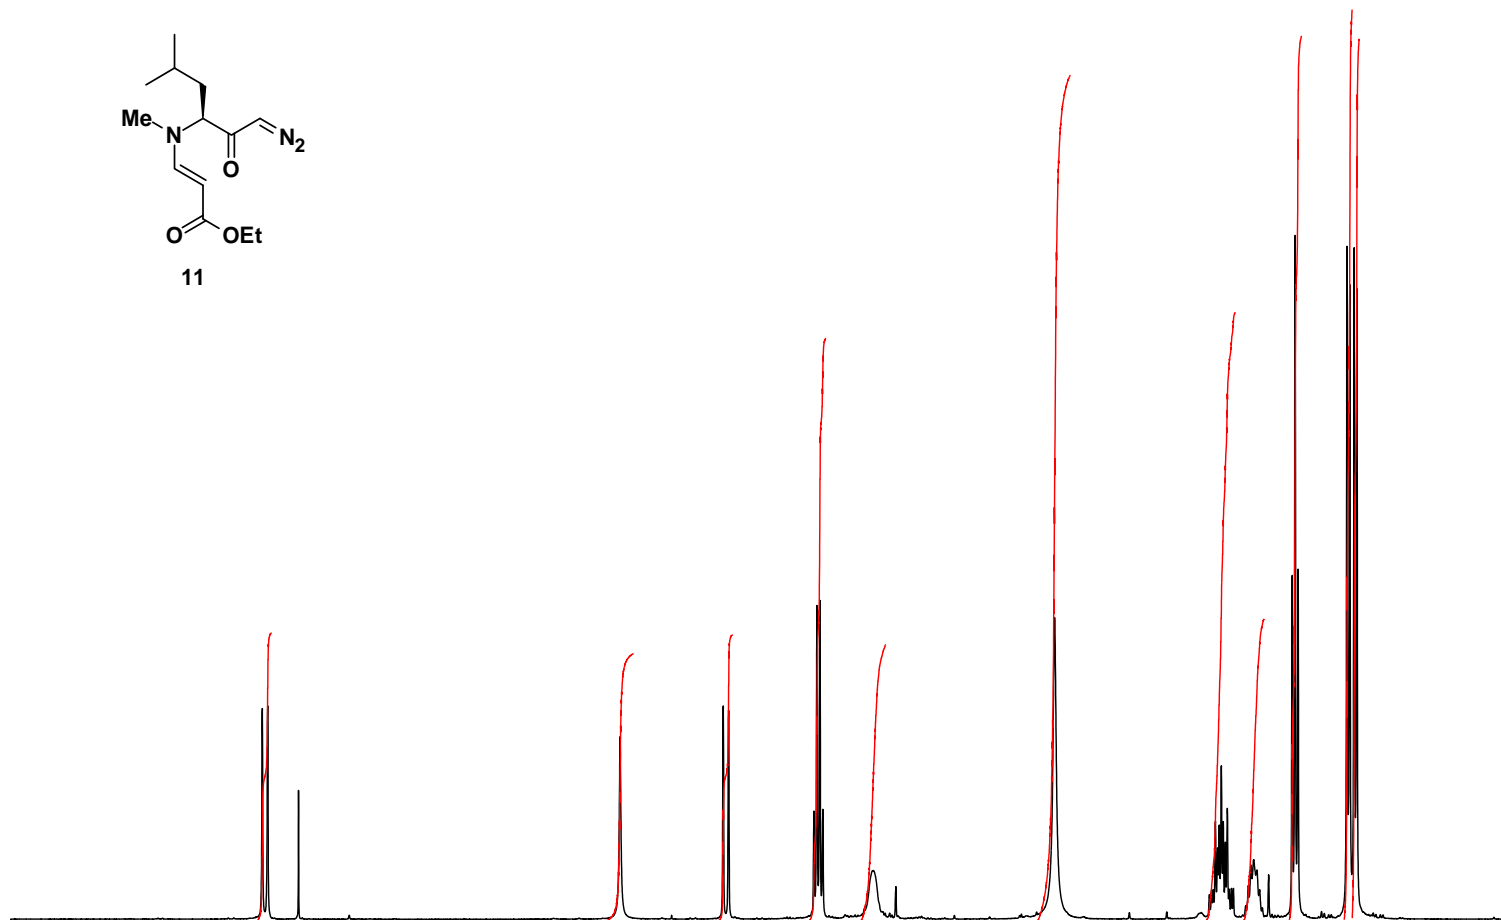

8.5 8.0 7.5 7.0 6.5 6.0 5.5 5.0 4.5 4.0 3.5 3.0 2.5 2.0 1.5 1.0 ppm

1.00  
0.93  
0.99  
2.02  
0.96  
2.94  
2.11  
1.05  
3.08  
3.17  
3.06



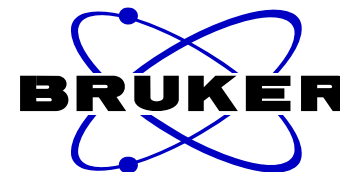

Current Data Parameters  
NAME 090113  
EXPNO 12  
PROCNO 1

F2 - Acquisition Parameters  
Date\_ 20090114  
Time 5.54  
INSTRUM spect  
PROBHD 5 mm PABBO BB-  
PULPROG zgpg30  
TD 65536  
SOLVENT CDC13  
NS 2048  
DS 4  
SWH 24038.461 Hz  
FIDRES 0.366798 Hz  
AQ 1.3631988 sec  
RG 2050  
DW 20.800 usec  
DE 7.50 usec  
TE 295.4 K  
D1 2.00000000 sec  
d11 0.03000000 sec  
DELTA 1.89999998 sec  
TD0 1

===== CHANNEL f1 =====  
NUC1 13C  
P1 10.30 usec  
PL1 -3.00 dB  
SFO1 100.6228298 MHz

===== CHANNEL f2 =====  
CPDPRG2 waltz16  
NUC2 1H  
PCPD2 90.00 usec  
PL12 16.43 dB  
PL13 19.37 dB  
PL2 -3.00 dB  
SFO2 400.1316005 MHz

F2 - Processing parameters  
SI 32768  
SF 100.6127736 MHz  
WDW EM  
SSB 0  
LB 1.00 Hz  
GB 0  
PC 1.40

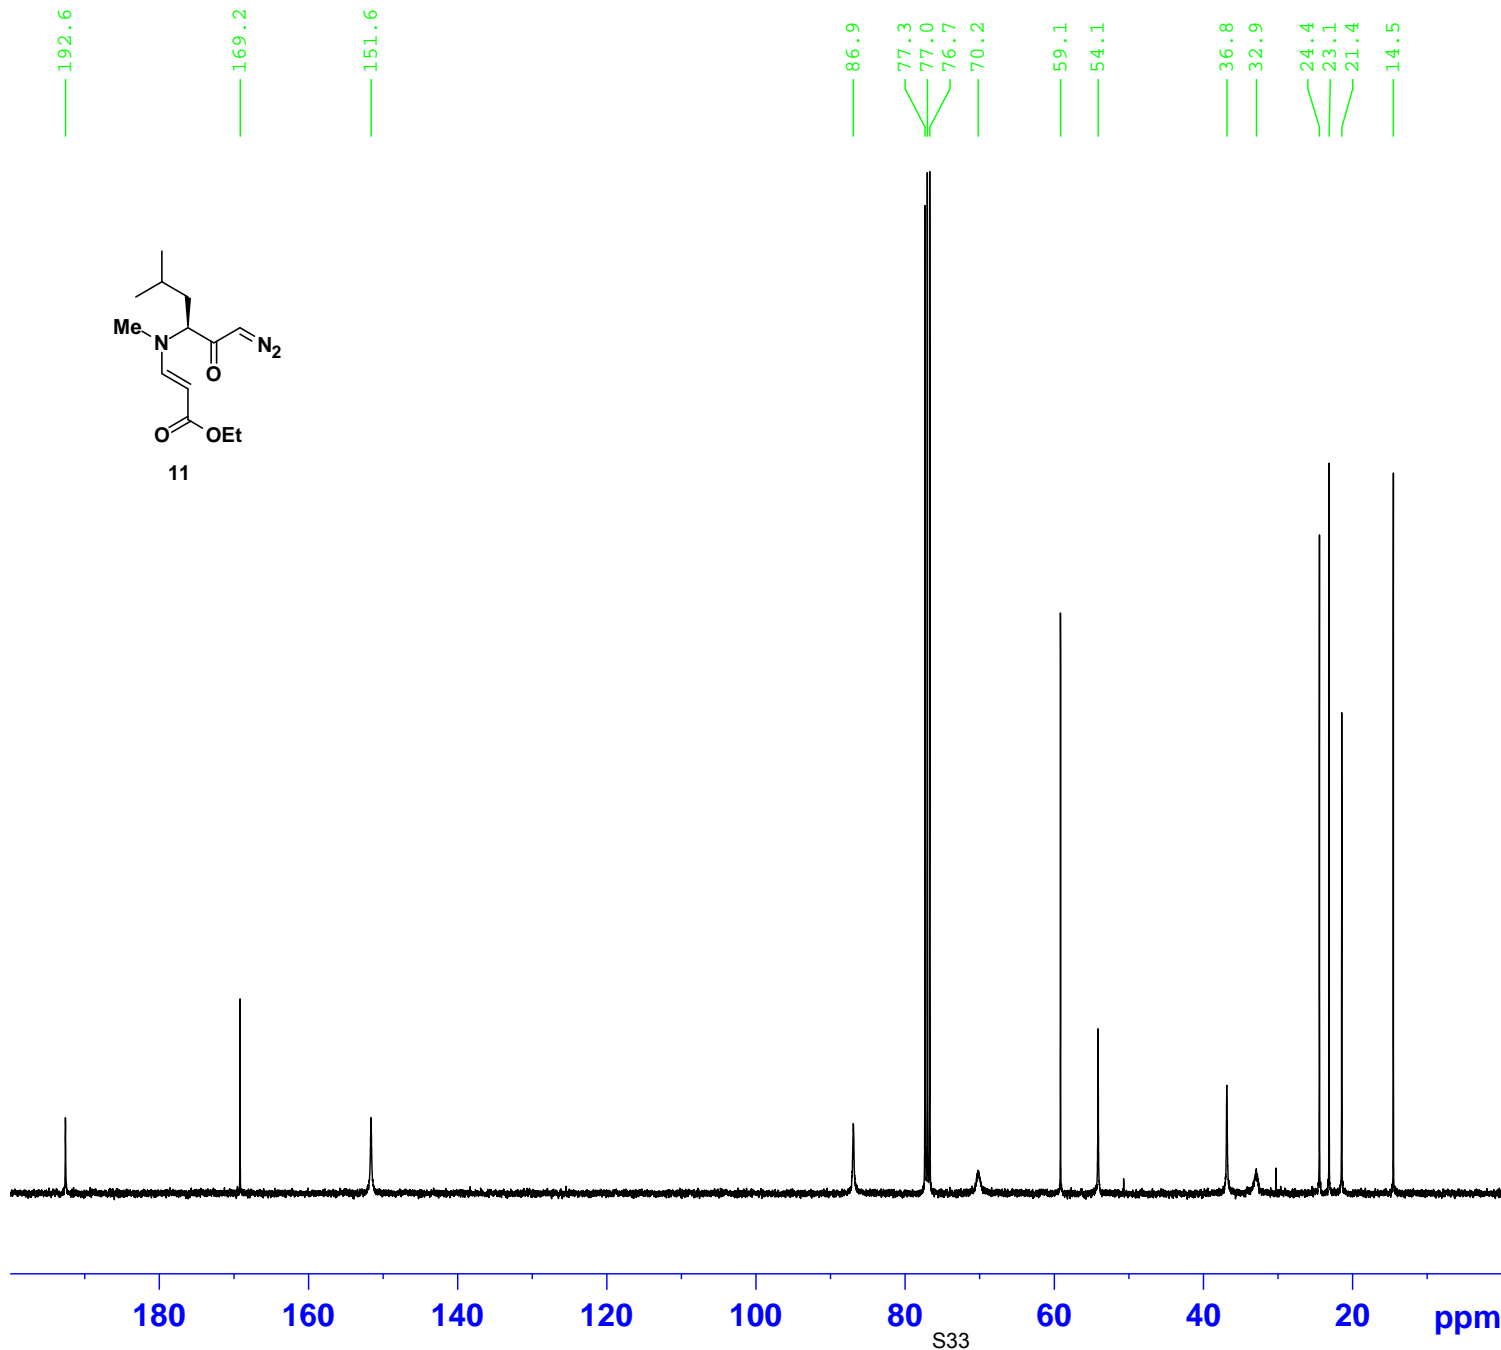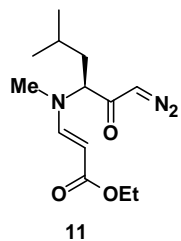

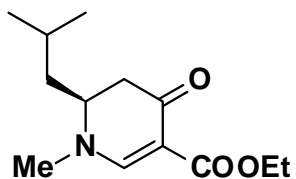

12

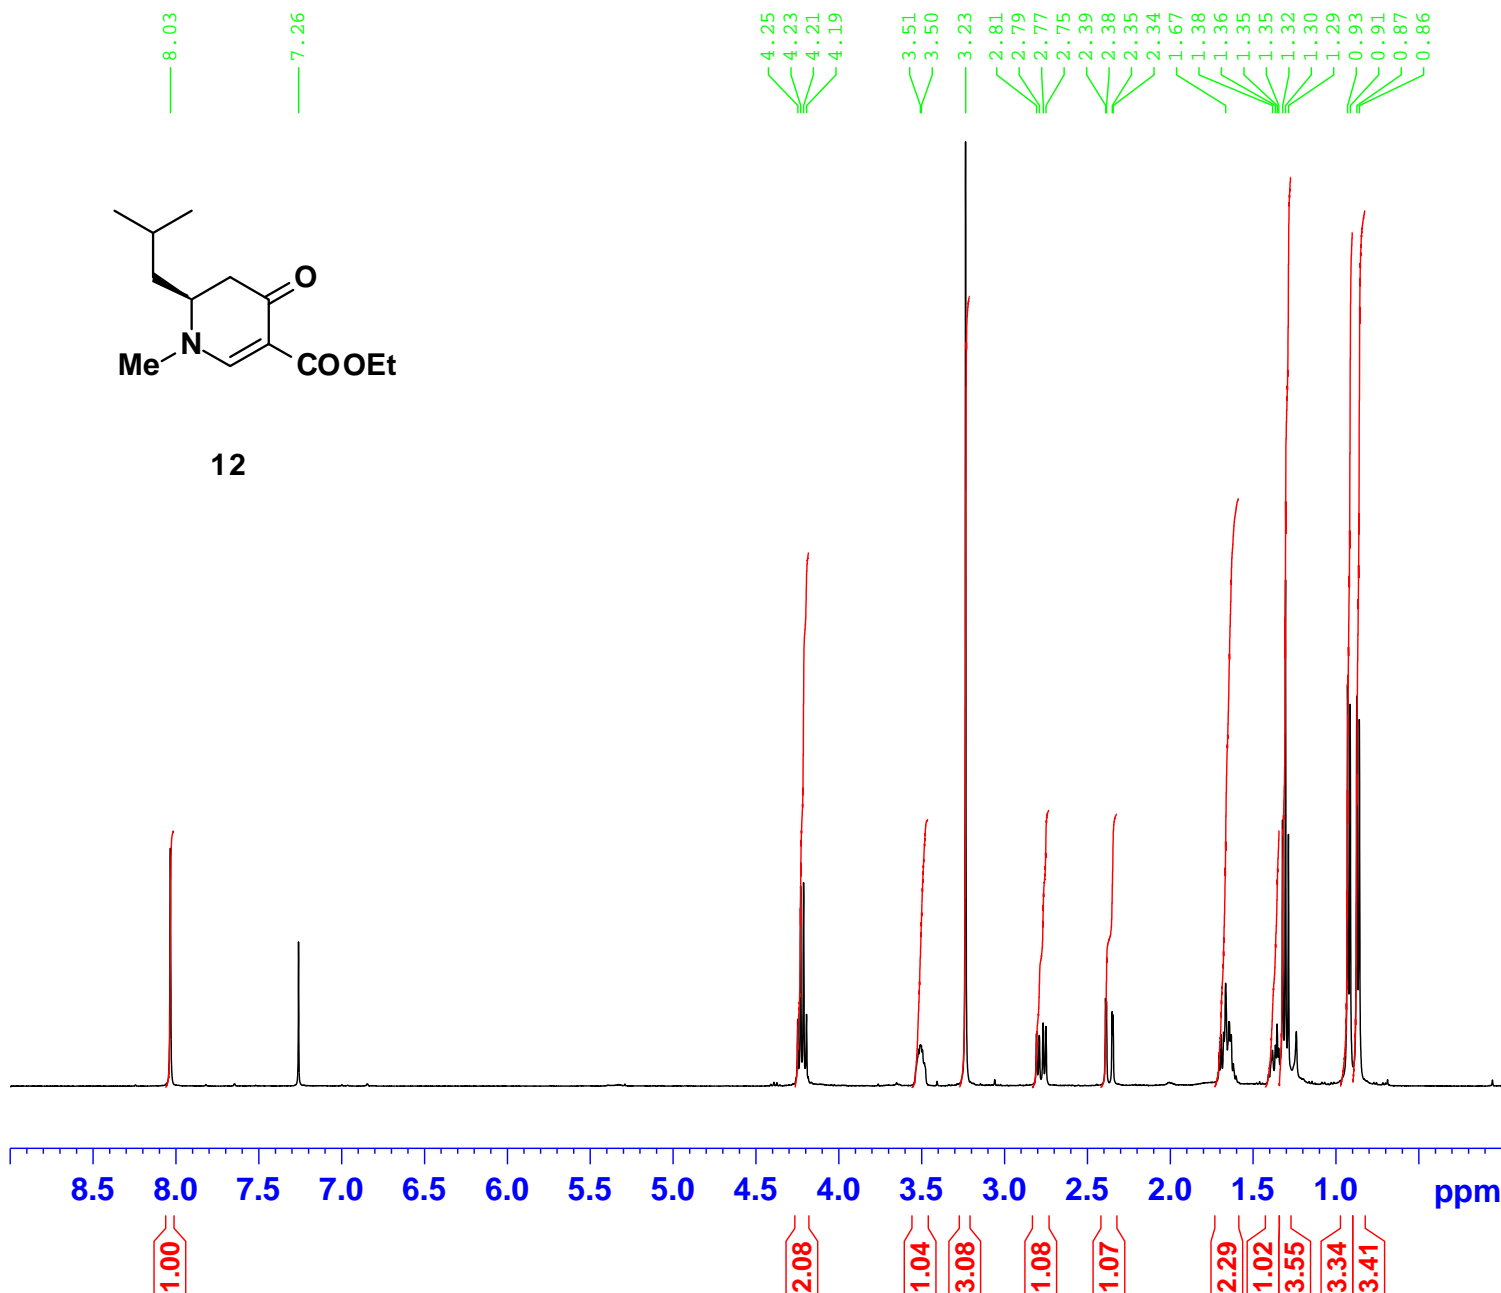

Current Data Parameters  
NAME 090108  
EXPNO 10  
PROCNO 1

F2 - Acquisition Parameters  
Date\_ 20090108  
Time 20.48  
INSTRUM spect  
PROBHD 5 mm PABBO BB-  
PULPROG zg30  
TD 65536  
SOLVENT CDC13  
NS 32  
DS 2  
SWH 8223.685 Hz  
FIDRES 0.125483 Hz  
AQ 3.9846387 sec  
RG 161  
DW 60.800 usec  
DE 6.50 usec  
TE 295.1 K  
D1 1.00000000 sec  
TD0 1

==== CHANNEL f1 =====  
NUC1 1H  
P1 9.61 usec  
PL1 -3.00 dB  
SFO1 400.1324710 MHz

F2 - Processing parameters  
SI 32768  
SF 400.1300028 MHz  
WDW EM  
SSB 0  
LB 0.30 Hz  
GB 0  
PC 1.00



Current Data Parameters  
NAME 090108  
EXPNO 11  
PROCNO 1

F2 - Acquisition Parameters  
Date\_ 20090108  
Time 23.02  
INSTRUM spect  
PROBHD 5 mm PABBO BB-  
PULPROG zgpg30  
TD 65536  
SOLVENT CDC13  
NS 1024  
DS 4  
SWH 24038.461 Hz  
FIDRES 0.366798 Hz  
AQ 1.3631988 sec  
RG 2050  
DW 20.800 usec  
DE 7.50 usec  
TE 295.4 K  
D1 2.00000000 sec  
d11 0.03000000 sec  
DELTA 1.89999998 sec  
TD0 1

==== CHANNEL f1 =====  
NUC1 13C  
P1 10.30 usec  
PL1 -3.00 dB  
SFO1 100.6228298 MHz

==== CHANNEL f2 =====  
CPDPRG2 waltz16  
NUC2 1H  
PCPD2 90.00 usec  
PL12 16.43 dB  
PL13 19.37 dB  
PL2 -3.00 dB  
SFO2 400.1316005 MHz

F2 - Processing parameters  
SI 32768  
SF 100.6127721 MHz  
WDW EM  
SSB 0  
LB 1.00 Hz  
GB 0  
PC 1.40

185.7  
165.3  
158.6

99.4

77.3  
77.0  
76.7

59.8  
57.4

42.6  
39.5  
37.1

24.1  
23.4  
21.1  
14.5

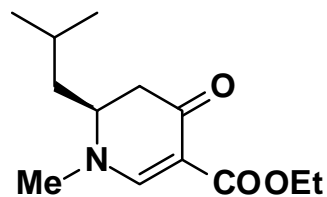

12

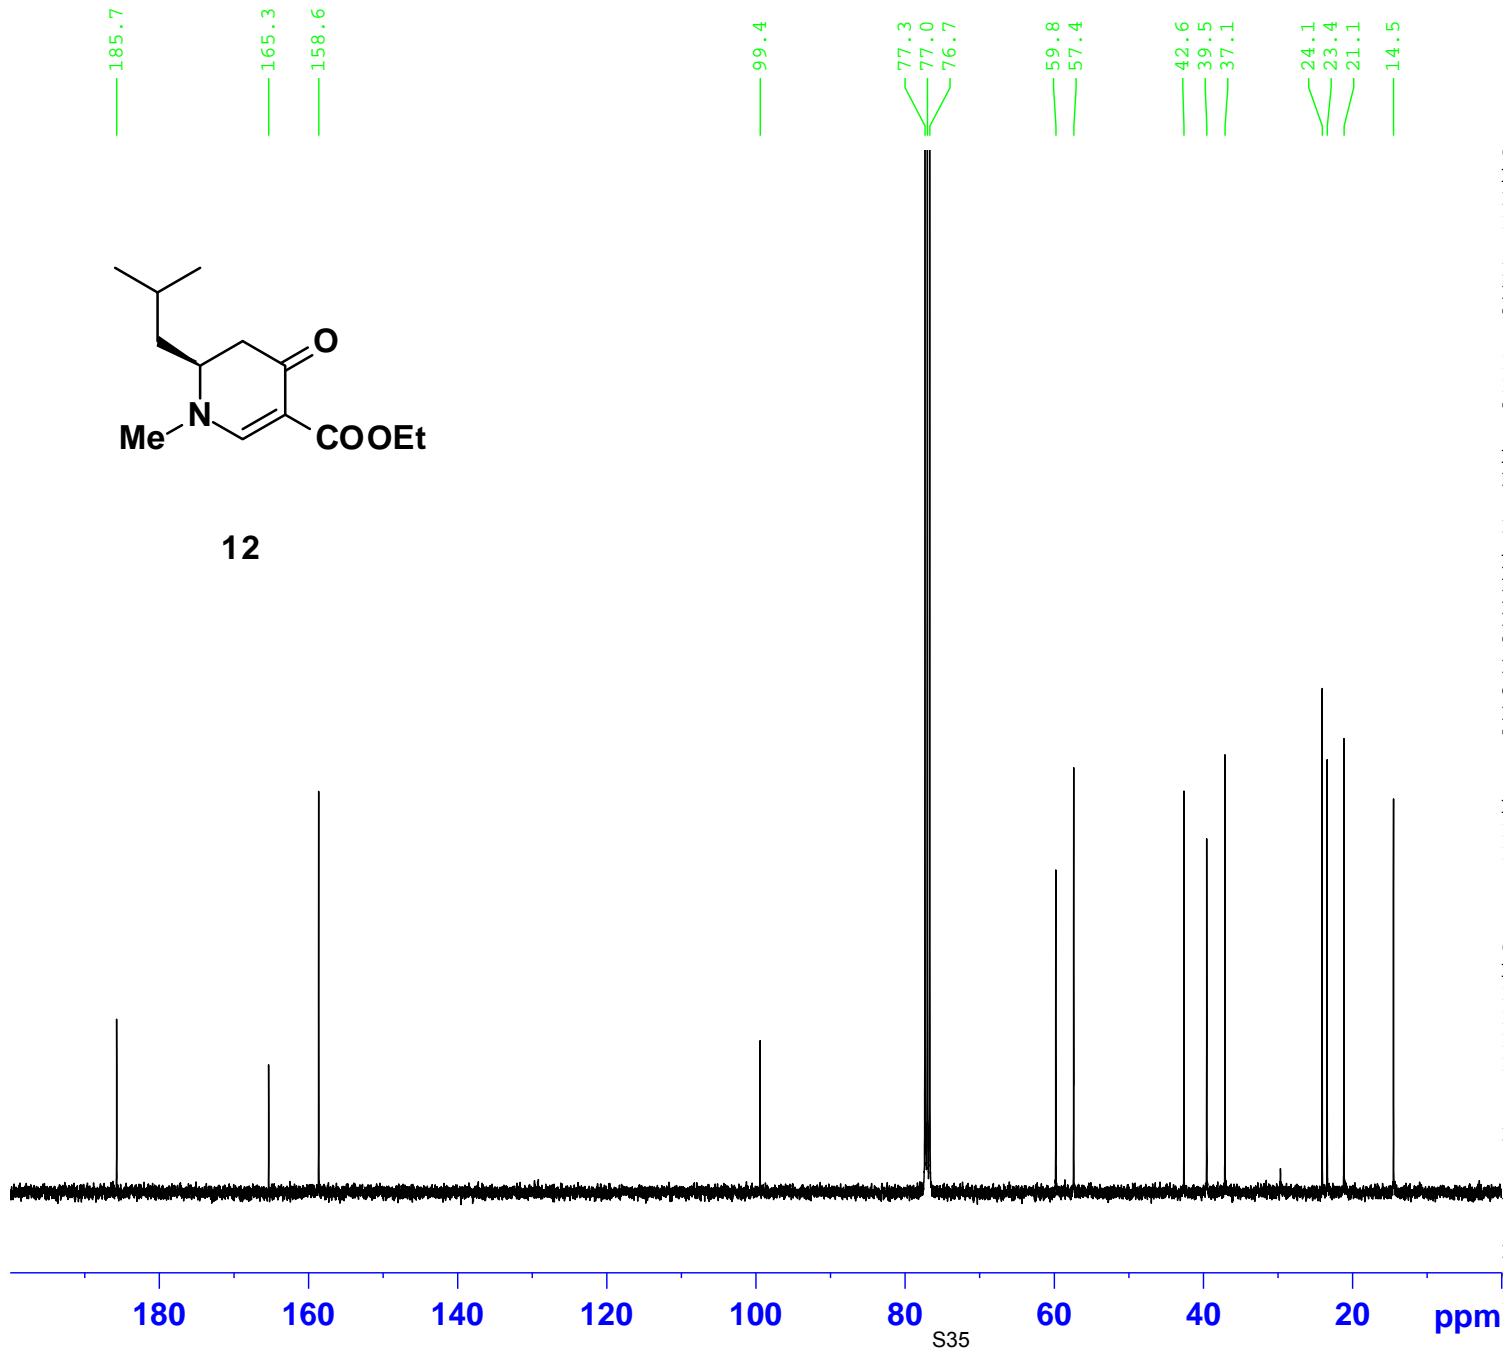

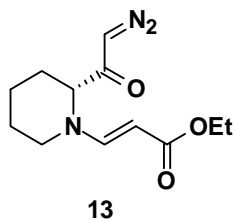

7.44  
7.41  
7.26

5.42

4.73  
4.70

4.16  
4.14  
4.12  
4.11  
3.99  
3.98

3.42  
3.39  
3.18

2.36  
2.33

1.68  
1.65  
1.49  
1.46  
1.43  
1.27  
1.25  
1.24

Current Data Parameters  
NAME 081024  
EXPNO 10  
PROCNO 1

F2 - Acquisition Parameters  
Date\_ 20081024  
Time 14.11  
INSTRUM spect  
PROBHD 5 mm PABBO BB-  
PULPROG zg30  
TD 65536  
SOLVENT CDC13  
NS 32  
DS 2  
SWH 8223.685 Hz  
FIDRES 0.125483 Hz  
AQ 3.9846387 sec  
RG 203  
DW 60.800 usec  
DE 6.50 usec  
TE 294.9 K  
D1 1.00000000 sec  
TD0 1

==== CHANNEL f1 =====  
NUC1 1H  
P1 9.61 usec  
PL1 -3.00 dB  
SFO1 400.1324710 MHz

F2 - Processing parameters  
SI 32768  
SF 400.1300036 MHz  
WDW EM  
SSB 0  
LB 0.30 Hz  
GB 0  
PC 1.00

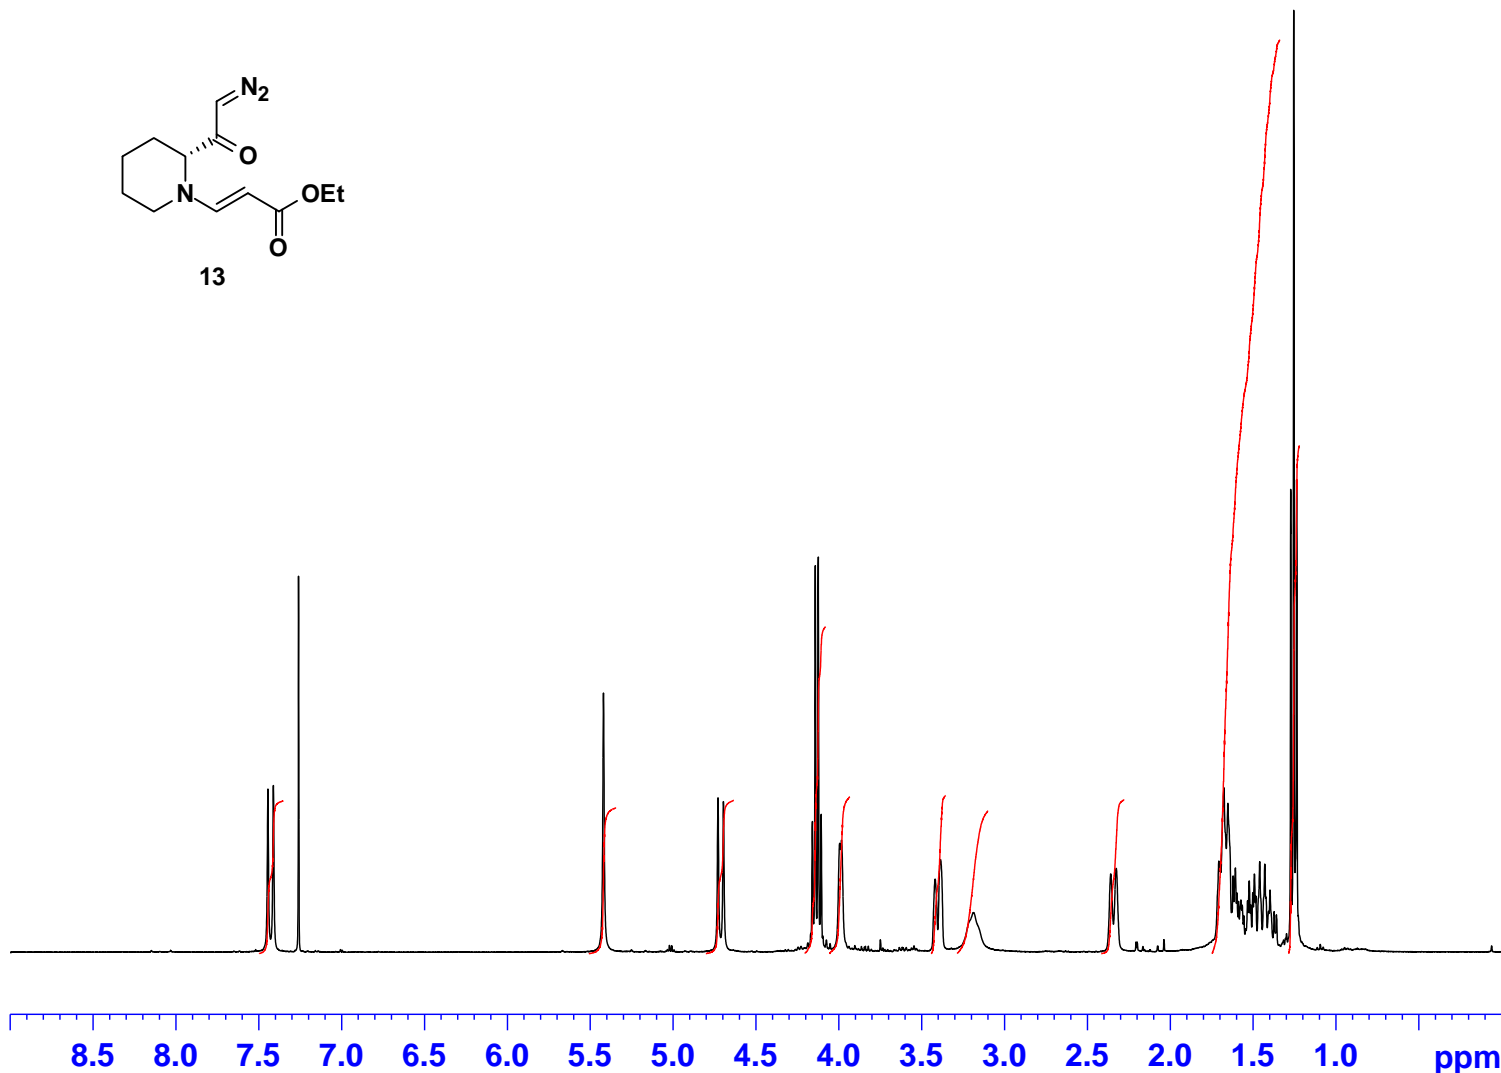

1.00

0.95

1.00

2.14

1.03

1.04

0.94

1.01

5.98

3.33



Current Data Parameters  
NAME 081023  
EXPNO 10  
PROCNO 1

F2 - Acquisition Parameters  
Date\_ 20081024  
Time 2.50  
INSTRUM spect  
PROBHD 5 mm PABBO BB-  
PULPROG zgpg30  
TD 65536  
SOLVENT CDC13  
NS 1024  
DS 4  
SWH 24038.461 Hz  
FIDRES 0.366798 Hz  
AQ 1.3631988 sec  
RG 2050  
DW 20.800 usec  
DE 7.50 usec  
TE 295.2 K  
D1 2.00000000 sec  
d11 0.03000000 sec  
DELTA 1.89999998 sec  
TD0 1

==== CHANNEL f1 =====  
NUC1 13C  
P1 10.30 usec  
PL1 -3.00 dB  
SFO1 100.6228298 MHz

==== CHANNEL f2 =====  
CPDPRG2 waltz16  
NUC2 1H  
PCPD2 90.00 usec  
PL12 16.43 dB  
PL13 19.37 dB  
PL2 -3.00 dB  
SFO2 400.1316005 MHz

F2 - Processing parameters  
SI 32768  
SF 100.6127690 MHz  
WDW EM  
SSB 0  
LB 1.00 Hz  
GB 0  
PC 1.40

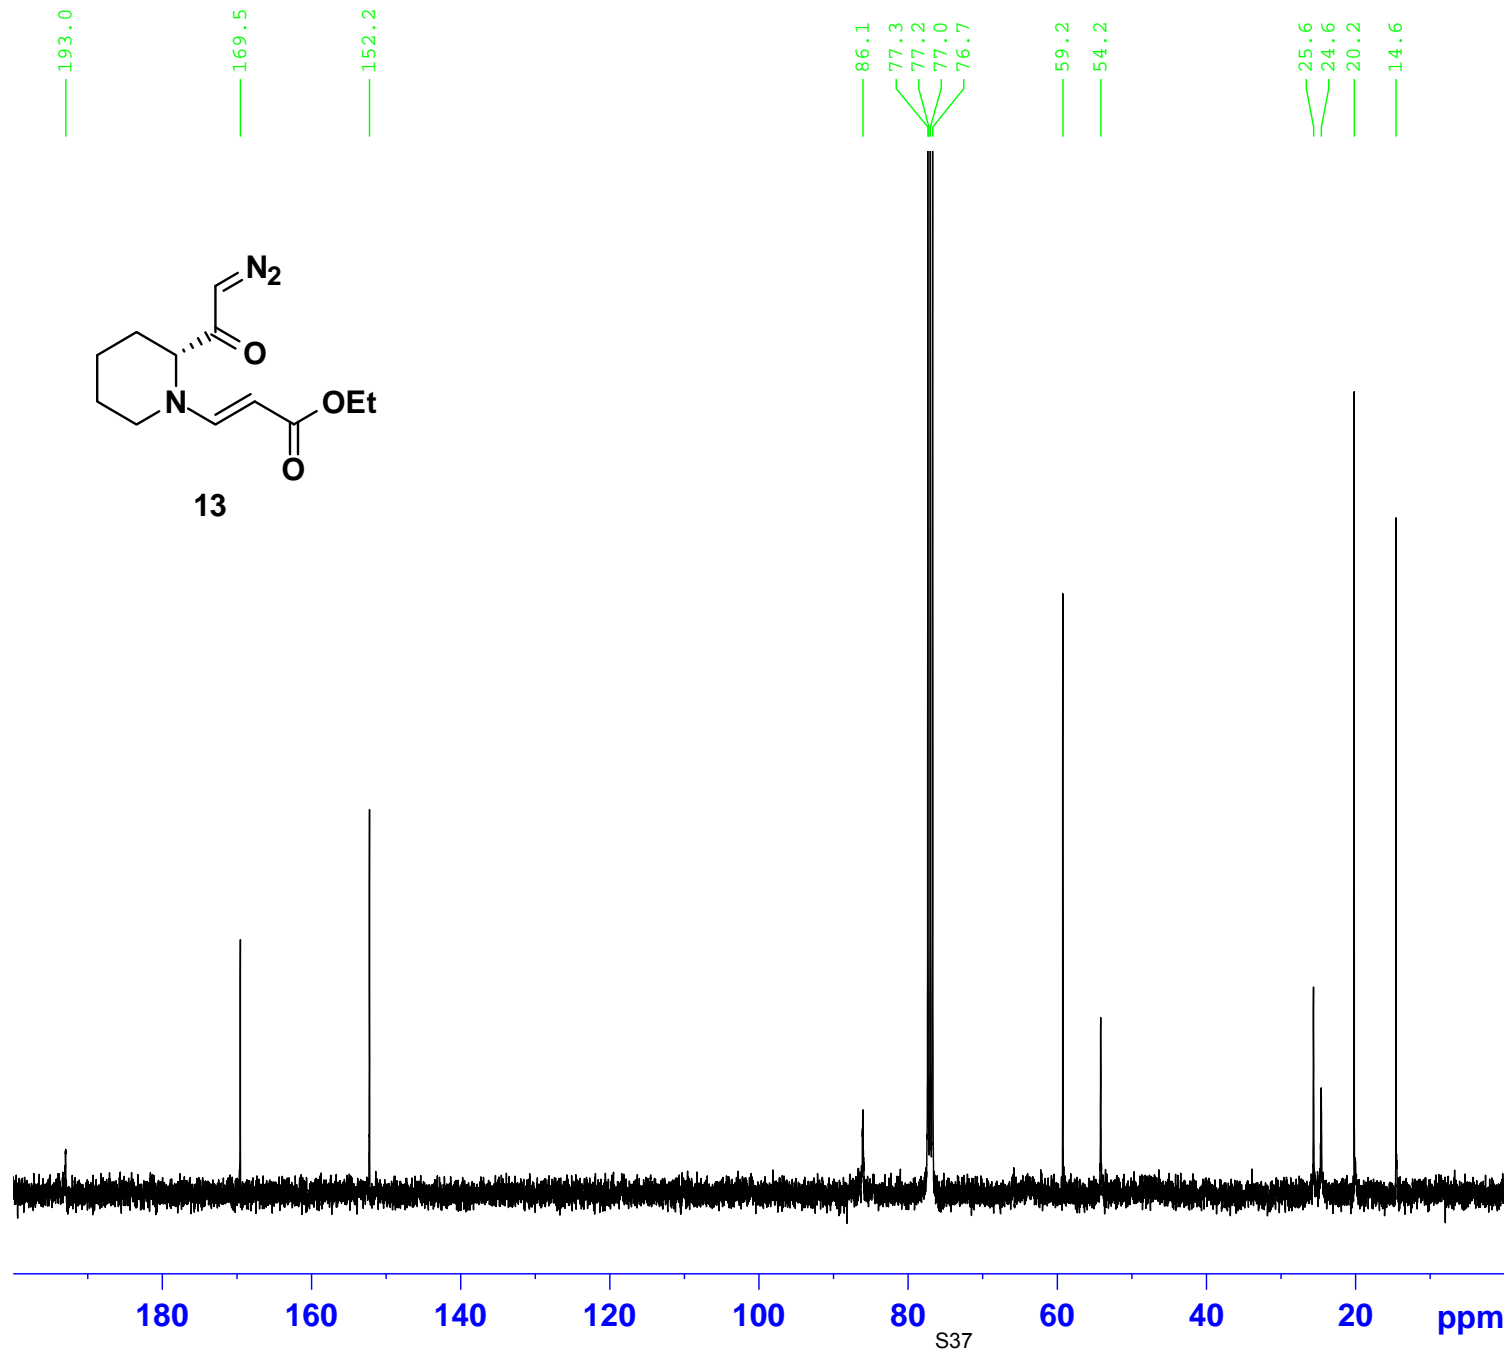

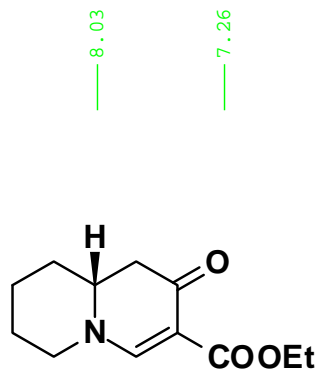

14

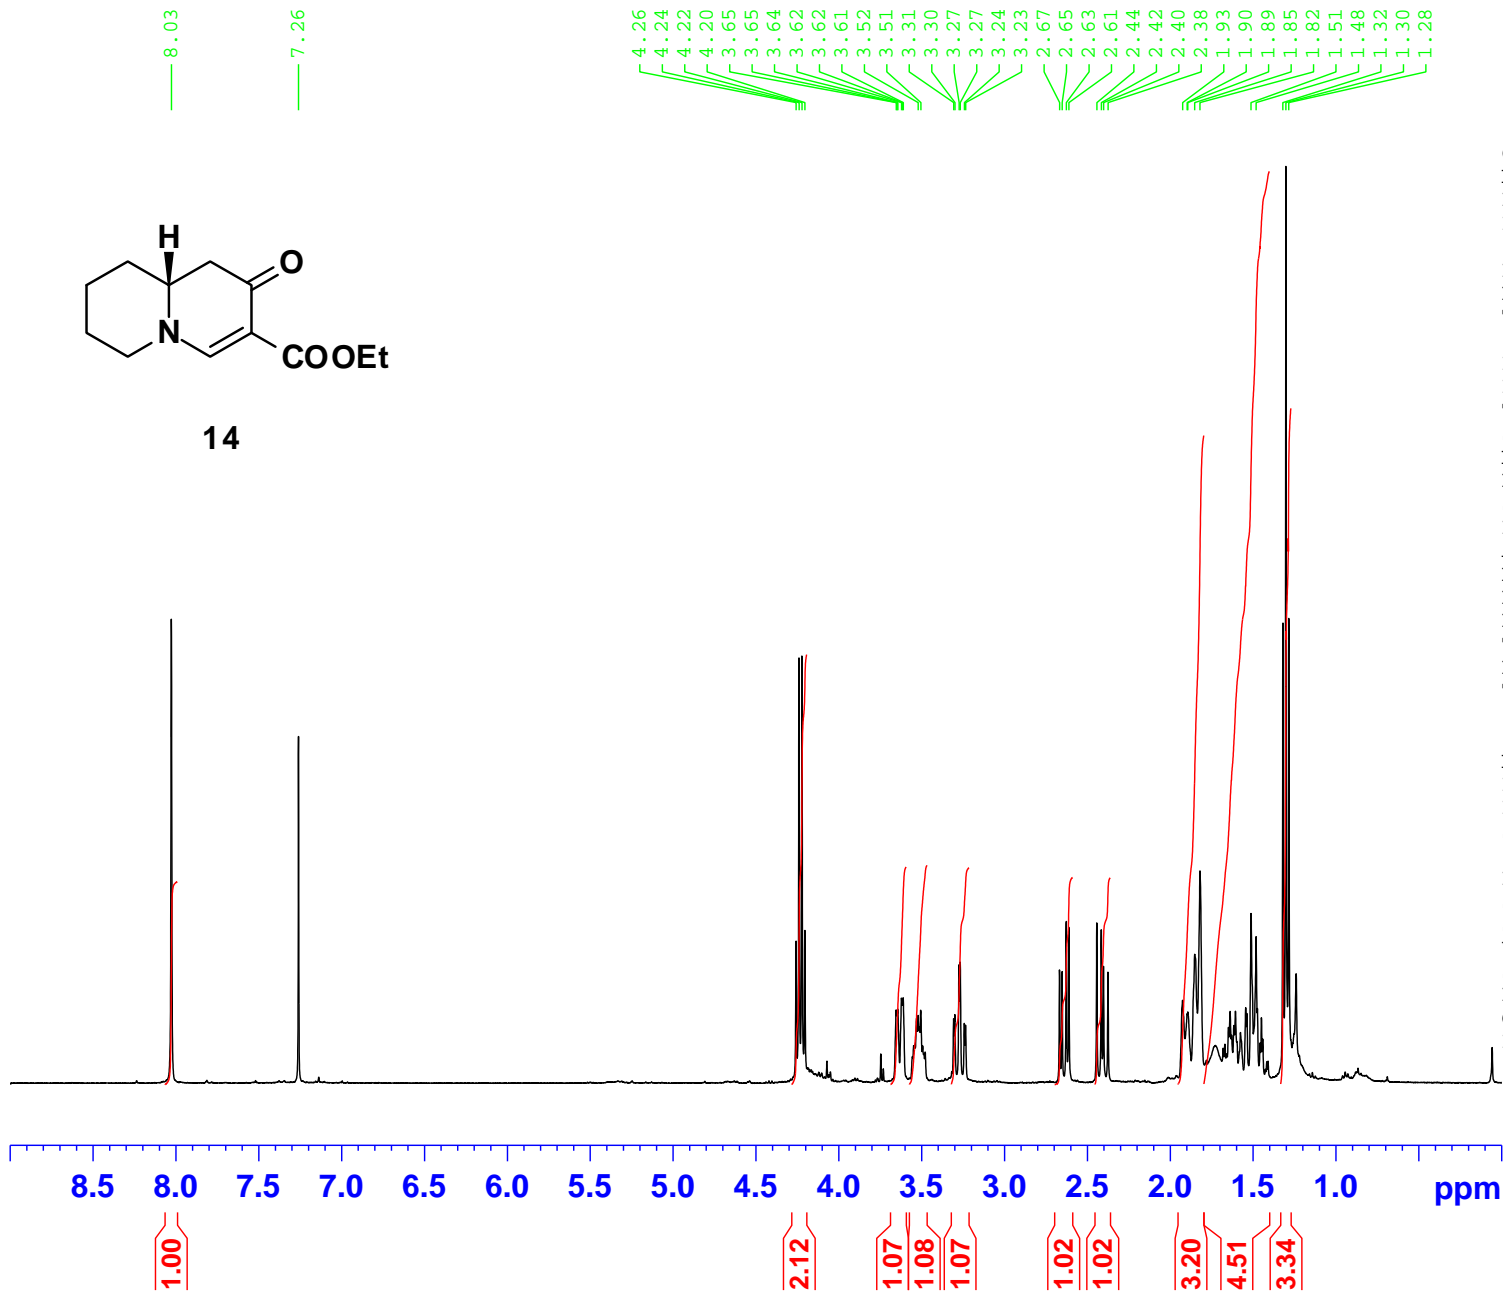

Current Data Parameters  
NAME 081026  
EXPNO 20  
PROCNO 1

F2 - Acquisition Parameters  
Date\_ 20081026  
Time 16.37  
INSTRUM spect  
PROBHD 5 mm PABBO BB-  
PULPROG zg30  
TD 65536  
SOLVENT CDC13  
NS 32  
DS 2  
SWH 8223.685 Hz  
FIDRES 0.125483 Hz  
AQ 3.9846387 sec  
RG 203  
DW 60.800 usec  
DE 6.50 usec  
TE 294.9 K  
D1 1.00000000 sec  
TD0 1

==== CHANNEL f1 =====  
NUC1 1H  
P1 9.61 usec  
PL1 -3.00 dB  
SFO1 400.1324710 MHz

F2 - Processing parameters  
SI 32768  
SF 400.1300031 MHz  
WDW EM  
SSB 0  
LB 0.30 Hz  
GB 0  
PC 1.00



Current Data Parameters  
NAME 081025  
EXPNO 61  
PROCNO 1

F2 - Acquisition Parameters  
Date\_ 20081026  
Time 5.04  
INSTRUM spect  
PROBHD 5 mm PABBO BB-  
PULPROG zgpg30  
TD 65536  
SOLVENT CDC13  
NS 1024  
DS 4  
SWH 24038.461 Hz  
FIDRES 0.366798 Hz  
AQ 1.3631988 sec  
RG 1820  
DW 20.800 usec  
DE 7.50 usec  
TE 295.0 K  
D1 2.00000000 sec  
d11 0.03000000 sec  
DELTA 1.89999998 sec  
TD0 1

===== CHANNEL f1 =====  
NUC1 13C  
P1 10.30 usec  
PL1 -3.00 dB  
SFO1 100.6228298 MHz

===== CHANNEL f2 =====  
CPDPRG2 waltz16  
NUC2 1H  
PCPD2 90.00 usec  
PL12 16.43 dB  
PL13 19.37 dB  
PL2 -3.00 dB  
SFO2 400.1316005 MHz

F2 - Processing parameters  
SI 32768  
SF 100.6127731 MHz  
WDW EM  
SSB 0  
LB 1.00 Hz  
GB 0  
PC 1.40

186.7  
165.3  
159.1  
100.5  
77.3  
77.0  
76.7  
59.8  
56.8  
54.4  
43.3  
31.8  
25.9  
22.9  
14.5

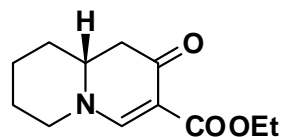

14

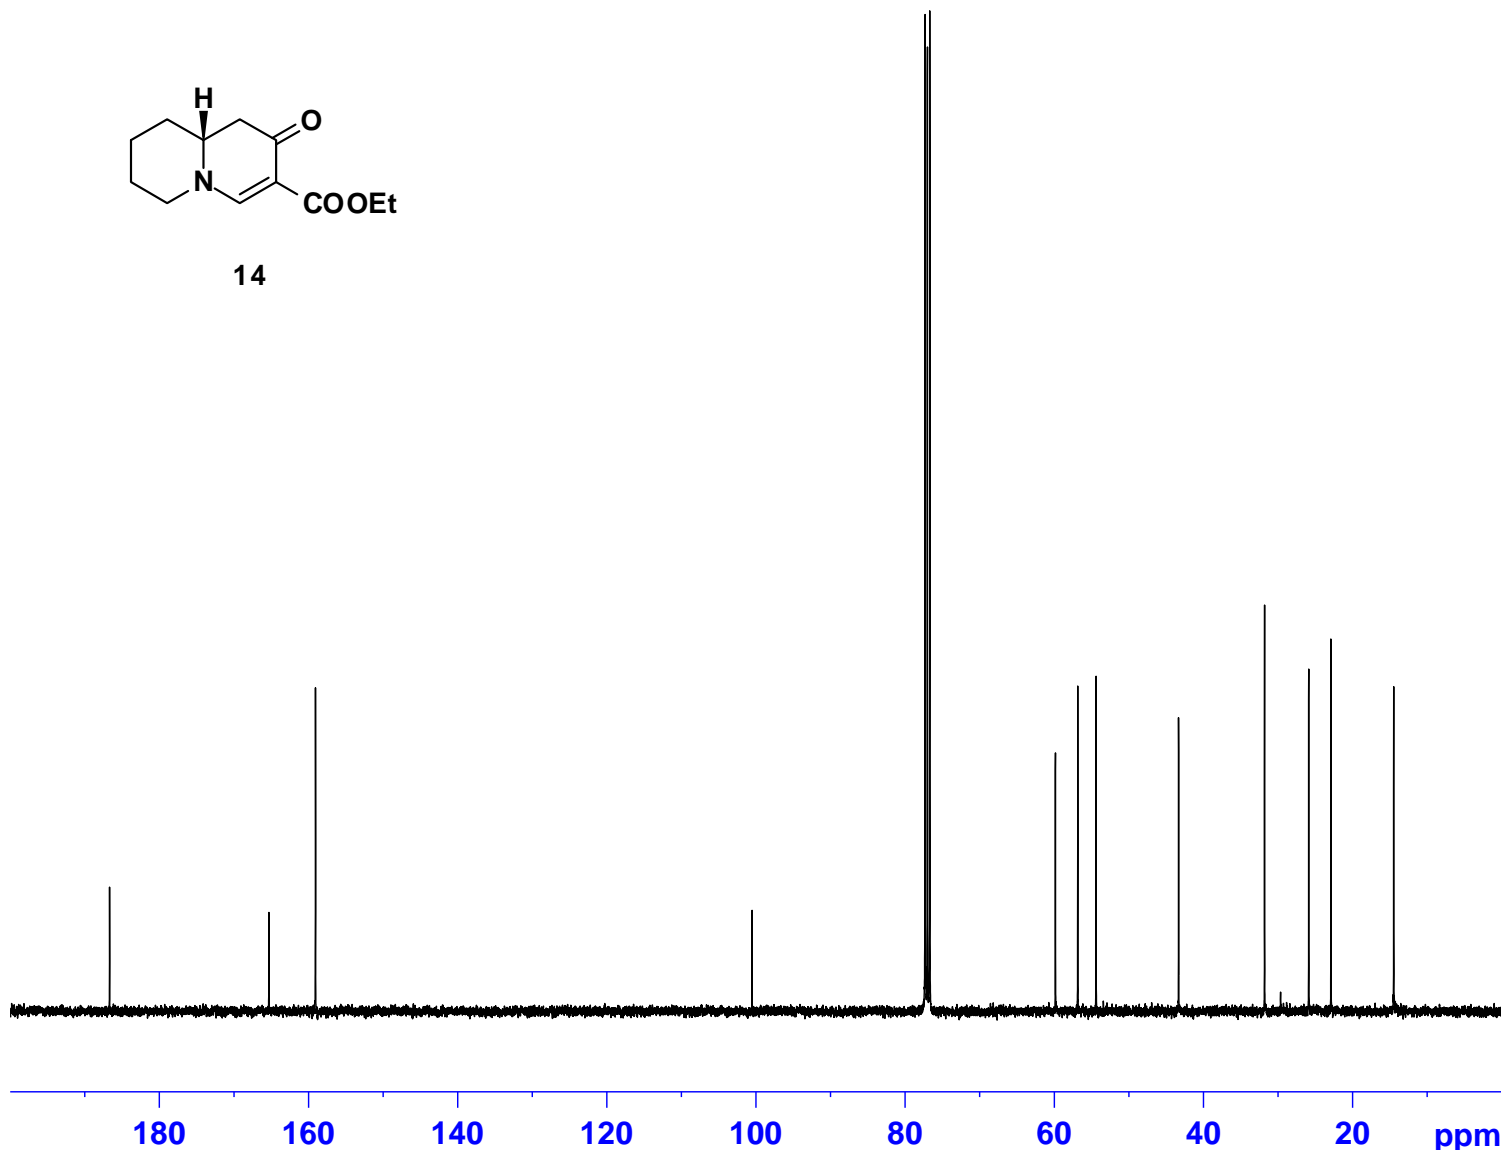



Current Data Parameters  
NAME 081026  
EXPNO 30  
PROCNO 1

F2 - Acquisition Parameters  
Date\_ 20081026  
Time 16.50  
INSTRUM spect  
PROBHD 5 mm PABBO BB-  
PULPROG zg30  
TD 65536  
SOLVENT CDC13  
NS 16  
DS 2  
SWH 8223.685 Hz  
FIDRES 0.125483 Hz  
AQ 3.9846387 sec  
RG 203  
DW 60.800 usec  
DE 6.50 usec  
TE 294.9 K  
D1 1.00000000 sec  
TD0 1

==== CHANNEL f1 =====  
NUC1 1H  
P1 9.61 usec  
PL1 -3.00 dB  
SFO1 400.1324710 MHz

F2 - Processing parameters  
SI 32768  
SF 400.1300036 MHz  
WDW EM  
SSB 0  
LB 0.30 Hz  
GB 0  
PC 1.00

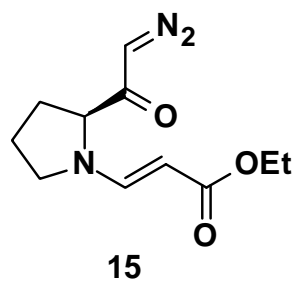

7.57  
7.54  
7.26

5.37

4.64  
4.61  
4.14  
4.13  
4.12  
4.11  
4.03

3.43  
3.30

2.16  
2.15  
1.98  
1.96

1.27  
1.25  
1.23

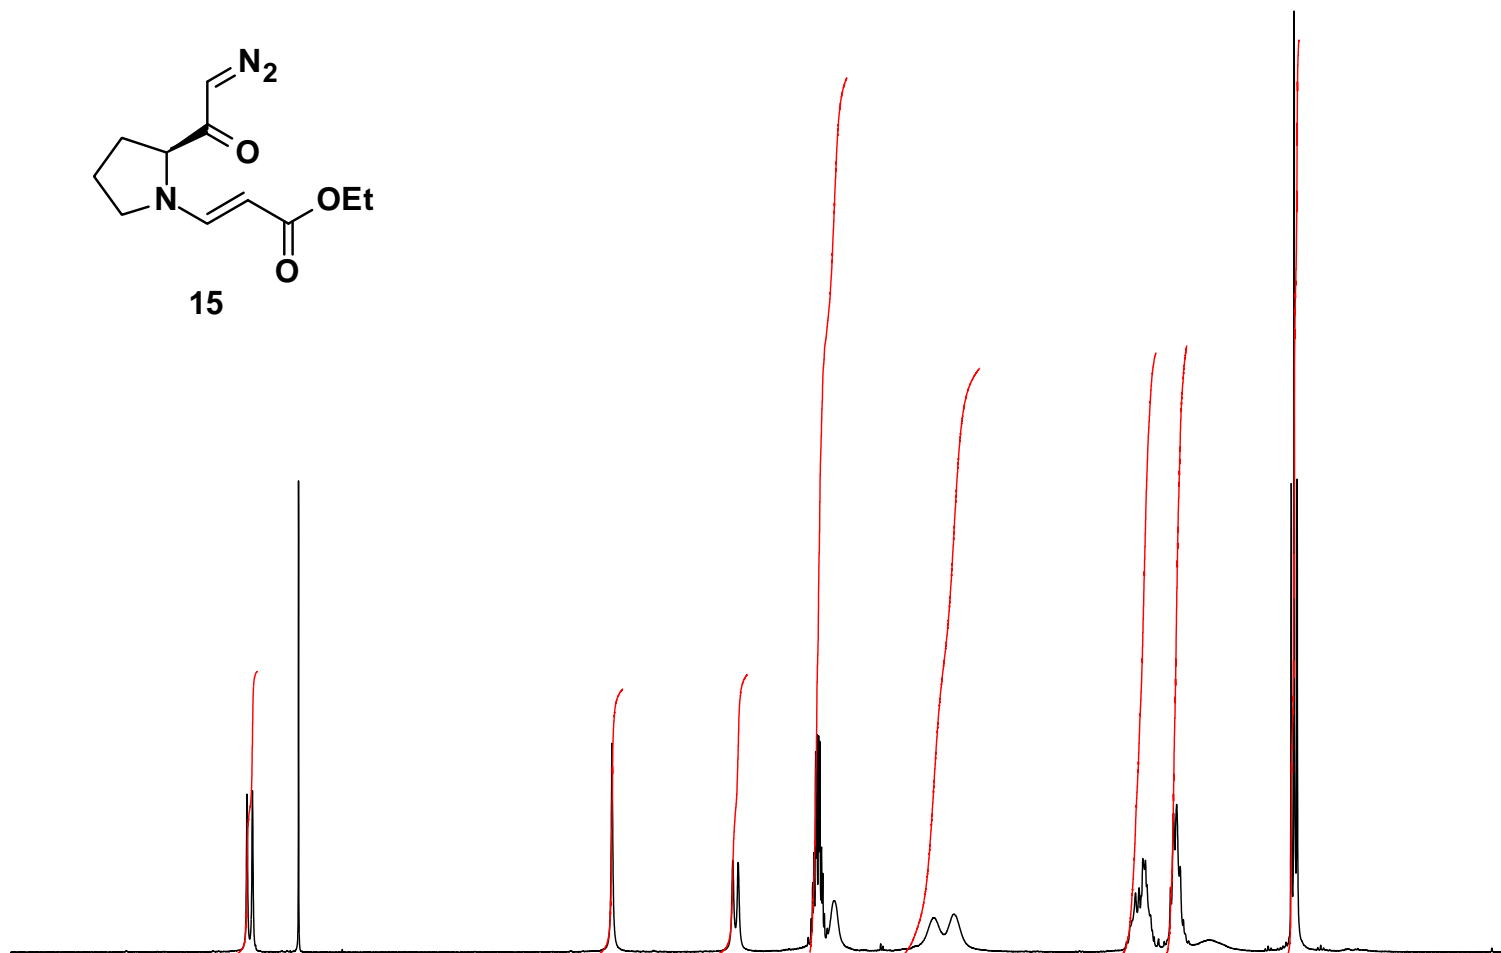

8.5 8.0 7.5 7.0 6.5 6.0 5.5 5.0 4.5 4.0 3.5 3.0 2.5 2.0 1.5 1.0 ppm

1.00

0.94

0.99

3.10

2.07

2.13

2.15

3.23





Current Data Parameters  
NAME 081026  
EXPNO 31  
PROCNO 1

F2 - Acquisition Parameters  
Date\_ 20081026  
Time 23.02  
INSTRUM spect  
PROBHD 5 mm PABBO BB-  
PULPROG zgpg30  
TD 65536  
SOLVENT CDC13  
NS 1024  
DS 4  
SWH 24038.461 Hz  
FIDRES 0.366798 Hz  
AQ 1.3631988 sec  
RG 1030  
DW 20.800 usec  
DE 7.50 usec  
TE 295.2 K  
D1 2.00000000 sec  
d11 0.03000000 sec  
DELTA 1.89999998 sec  
TD0 1

==== CHANNEL f1 =====  
NUC1 13C  
P1 10.30 usec  
PL1 -3.00 dB  
SFO1 100.6228298 MHz

==== CHANNEL f2 =====  
CPDPRG2 waltz16  
NUC2 1H  
PCPD2 90.00 usec  
PL12 16.43 dB  
PL13 19.37 dB  
PL2 -3.00 dB  
SFO2 400.1316005 MHz

F2 - Processing parameters  
SI 32768  
SF 100.6127690 MHz  
WDW EM  
SSB 0  
LB 1.00 Hz  
GB 0  
PC 1.40

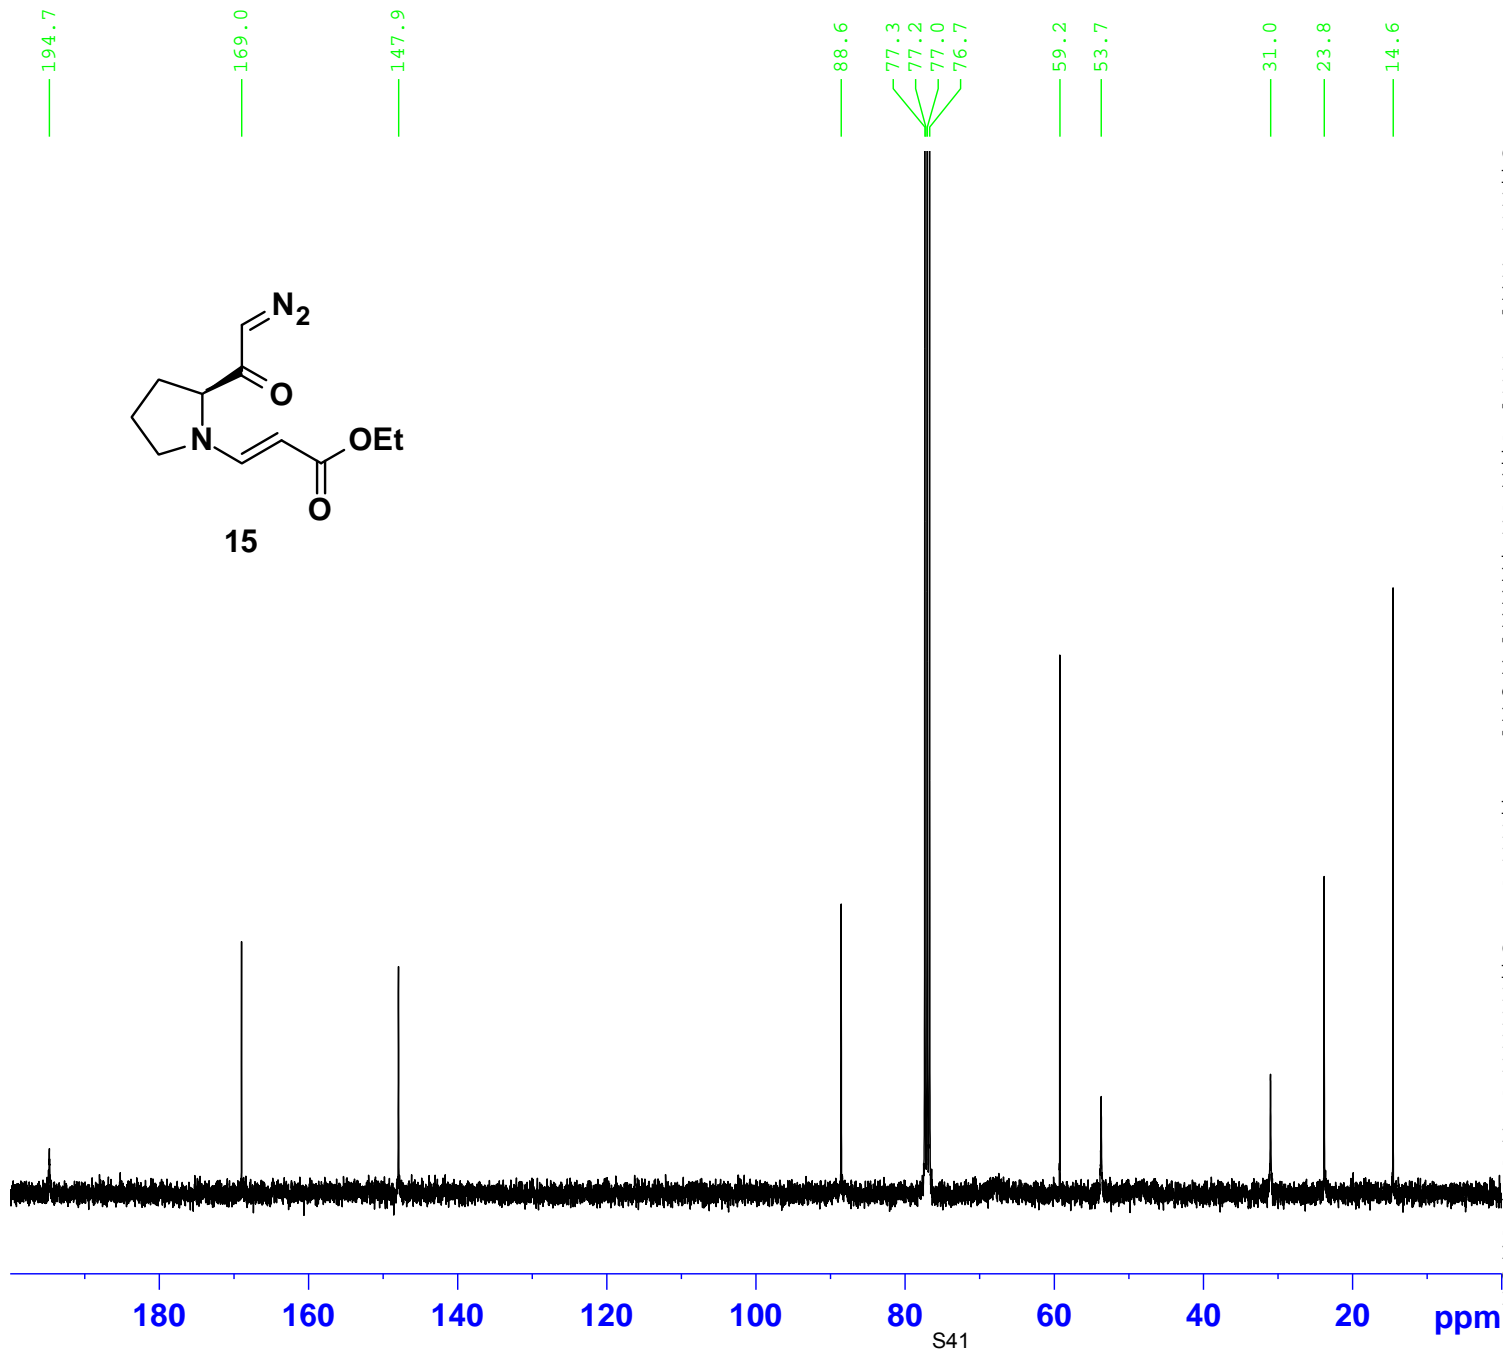

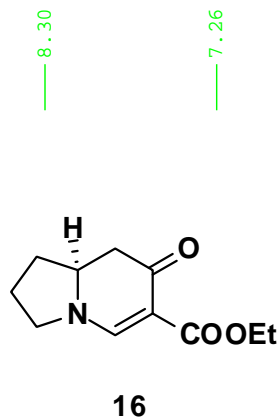

8.30  
7.26  
4.25  
4.24  
4.22  
4.20  
3.78  
3.75  
3.63  
3.62  
2.58  
2.57  
2.54  
2.53  
2.42  
2.38  
2.34  
2.15  
2.00  
2.00  
1.98  
1.97  
1.74  
1.72  
1.71  
1.32  
1.30  
1.28

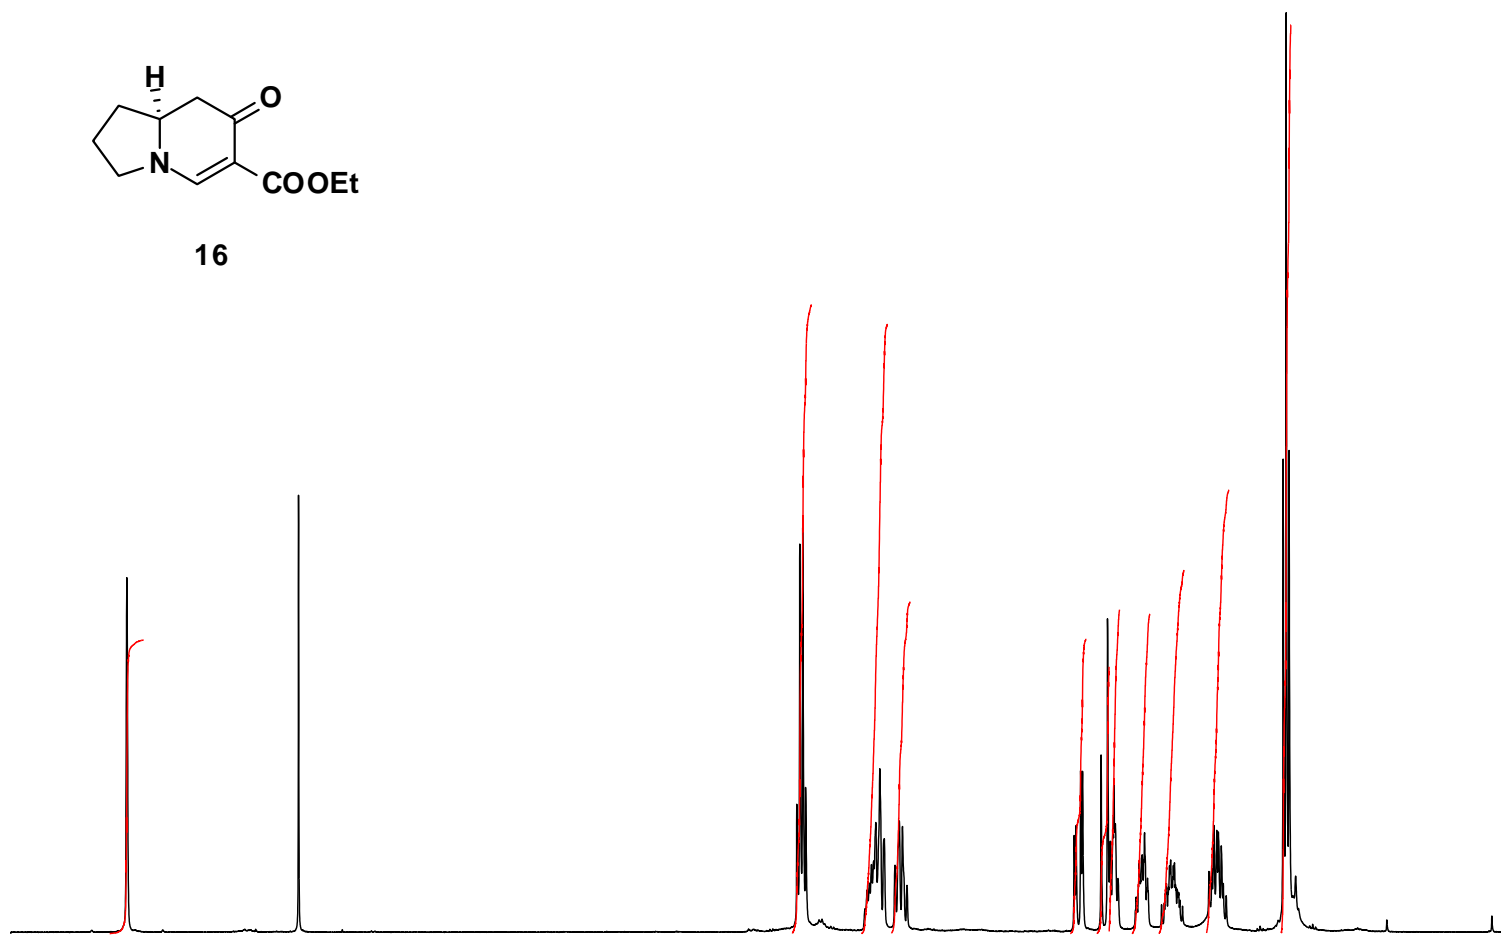

Current Data Parameters  
NAME 081012  
EXPNO 10  
PROCNO 1

F2 - Acquisition Parameters  
Date\_ 20081012  
Time 13.44  
INSTRUM spect  
PROBHD 5 mm PABBO BB-  
PULPROG zg30  
TD 65536  
SOLVENT CDC13  
NS 32  
DS 2  
SWH 8223.685 Hz  
FIDRES 0.125483 Hz  
AQ 3.9846387 sec  
RG 181  
DW 60.800 usec  
DE 6.50 usec  
TE 296.2 K  
D1 1.00000000 sec  
TD0 1

==== CHANNEL f1 =====  
NUC1 1H  
P1 9.61 usec  
PL1 -3.00 dB  
SFO1 400.1324710 MHz

F2 - Processing parameters  
SI 32768  
SF 400.1300036 MHz  
WDW EM  
SSB 0  
LB 0.30 Hz  
GB 0  
PC 1.00

1.00  
2.14  
2.08  
1.13  
1.00  
0.92  
1.10  
1.09  
1.24  
1.51  
3.11



187.2  
165.4  
155.7  
100.0  
77.3  
77.0  
76.7  
59.6  
58.1  
50.5  
41.9  
32.6  
24.1  
14.5

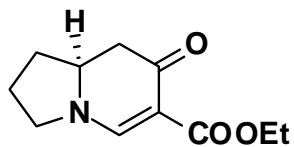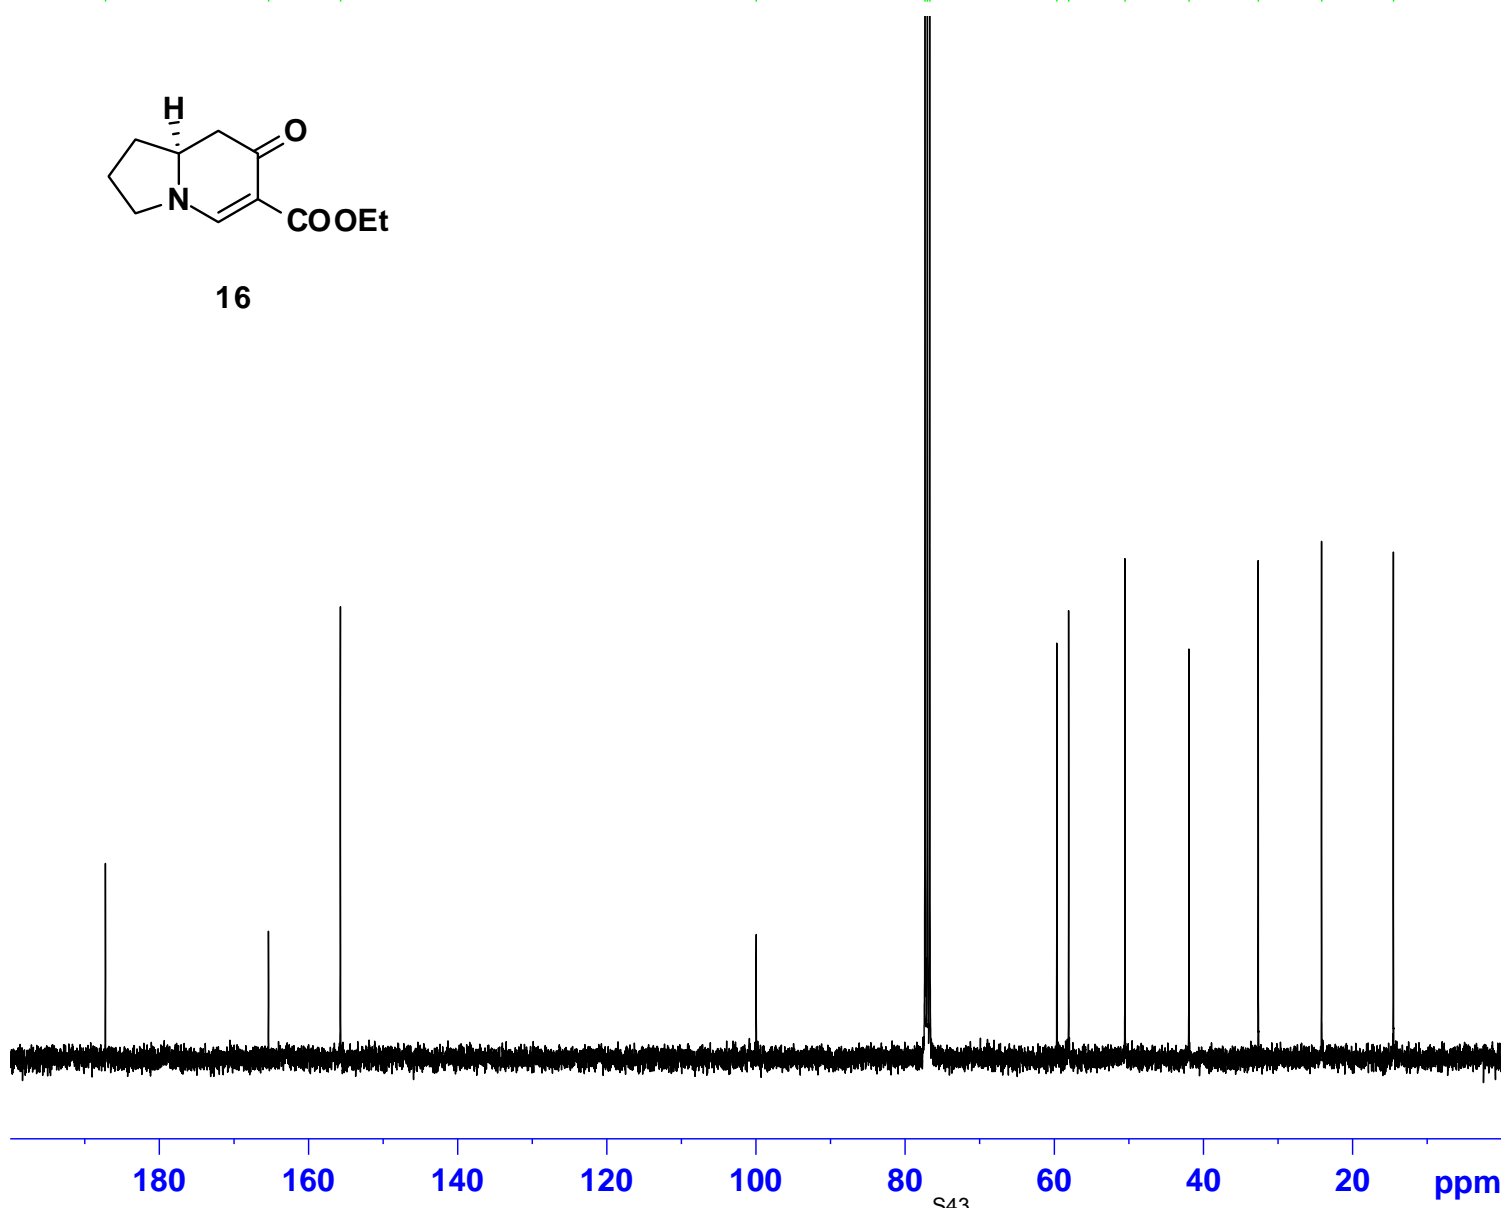

Current Data Parameters  
NAME 081012  
EXPNO 11  
PROCNO 1

F2 - Acquisition Parameters  
Date\_ 20081013  
Time 3.22  
INSTRUM spect  
PROBHD 5 mm PABBO BB-  
PULPROG zgpg30  
TD 65536  
SOLVENT CDC13  
NS 1024  
DS 4  
SWH 24038.461 Hz  
FIDRES 0.366798 Hz  
AQ 1.3631988 sec  
RG 2050  
DW 20.800 usec  
DE 7.50 usec  
TE 295.2 K  
D1 2.00000000 sec  
d11 0.03000000 sec  
DELTA 1.89999998 sec  
TD0 1

==== CHANNEL f1 =====  
NUC1 13C  
P1 10.30 usec  
PL1 -3.00 dB  
SFO1 100.6228298 MHz

==== CHANNEL f2 =====  
CPDPRG2 waltz16  
NUC2 1H  
PCPD2 90.00 usec  
PL12 16.43 dB  
PL13 19.37 dB  
PL2 -3.00 dB  
SFO2 400.1316005 MHz

F2 - Processing parameters  
SI 32768  
SF 100.6127721 MHz  
WDW EM  
SSB 0  
LB 1.00 Hz  
GB 0  
PC 1.40

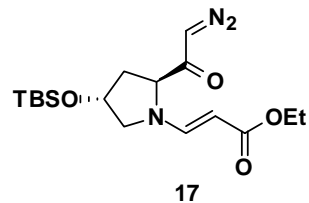

7.51  
7.48  
7.26

5.38  
4.62  
4.59  
4.45  
4.44  
4.43  
4.15  
4.14  
4.13  
4.12  
4.11  
3.57  
3.56  
3.19  
3.16

2.24  
2.14  
2.13  
2.12  
2.11  
1.67  
1.42  
1.27  
1.25  
1.23  
0.85

0.06  
0.05

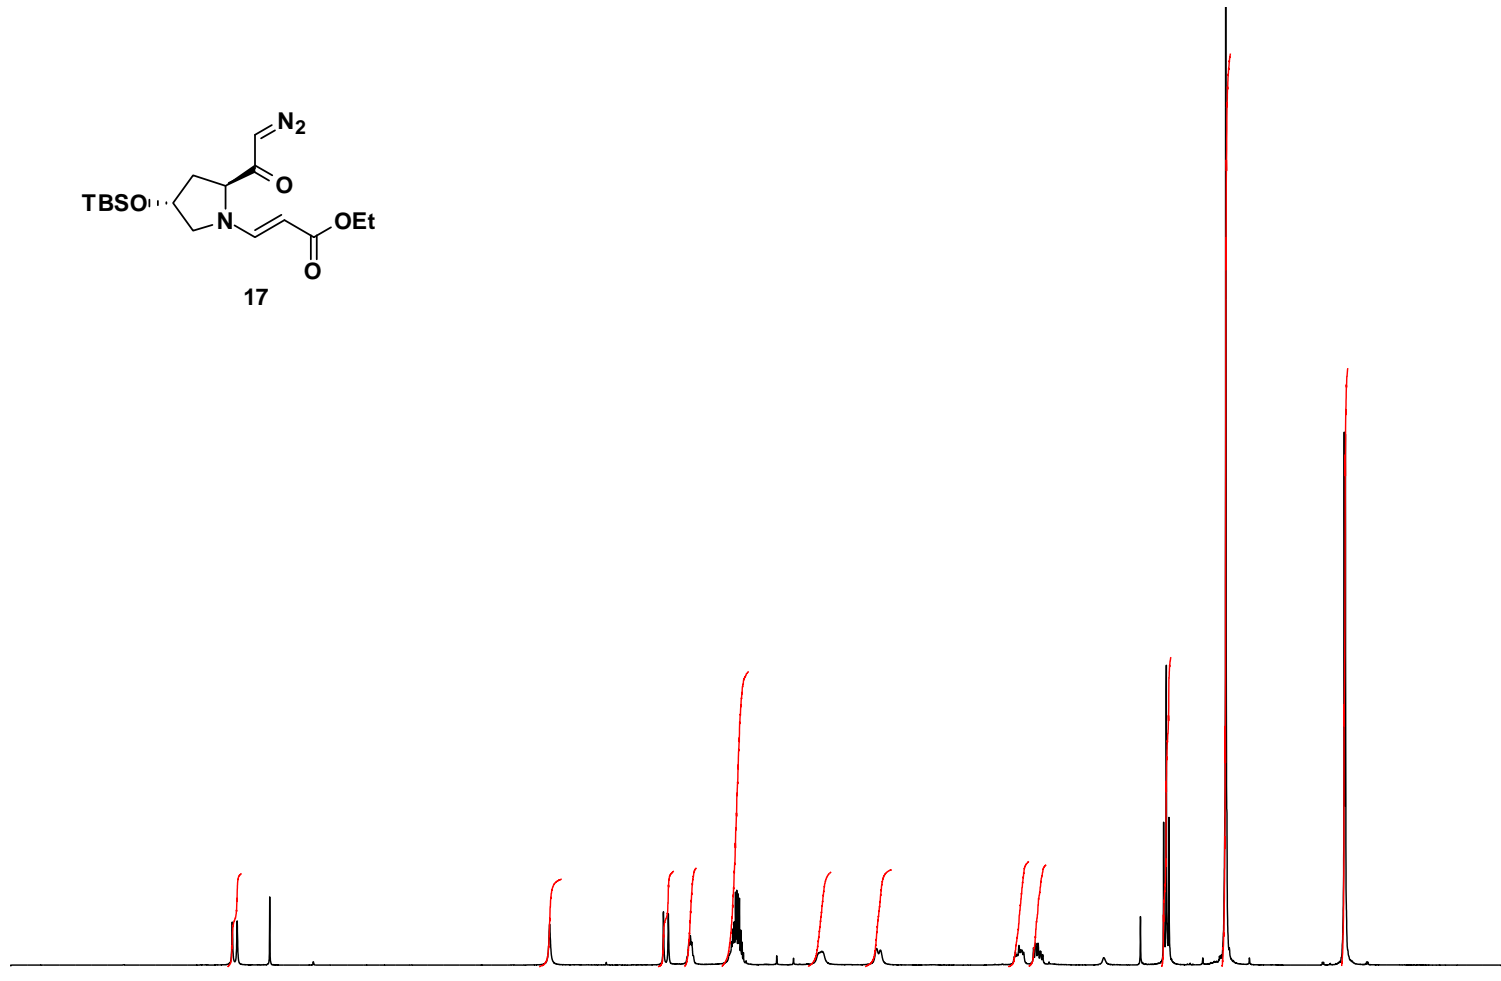

1.00

0.94

1.02

1.06

3.17

1.02

1.04

1.13

1.10

3.33

9.82

6.46

Current Data Parameters  
 NAME 090512  
 EXPNO 10  
 PROCNO 1

F2 - Acquisition Parameters  
 Date\_ 20090512  
 Time 15.34  
 INSTRUM spect  
 PROBHD 5 mm PABBO BB-  
 PULPROG zg30  
 TD 65536  
 SOLVENT CDC13  
 NS 16  
 DS 2  
 SWH 8223.685 Hz  
 FIDRES 0.125483 Hz  
 AQ 3.9846387 sec  
 RG 101  
 DW 60.800 usec  
 DE 6.50 usec  
 TE 298.0 K  
 D1 1.00000000 sec  
 TD0 1

==== CHANNEL f1 =====  
 NUC1 1H  
 P1 11.06 usec  
 PL1 -3.00 dB  
 PL1W 18.64416504 W  
 SFO1 400.1324710 MHz

F2 - Processing parameters  
 SI 32768  
 SF 400.1300053 MHz  
 WDW EM  
 SSB 0  
 LB 0.30 Hz  
 GB 0  
 PC 1.00

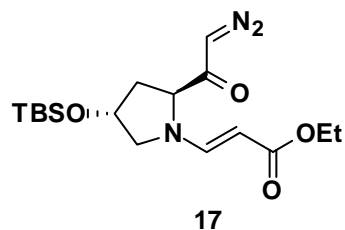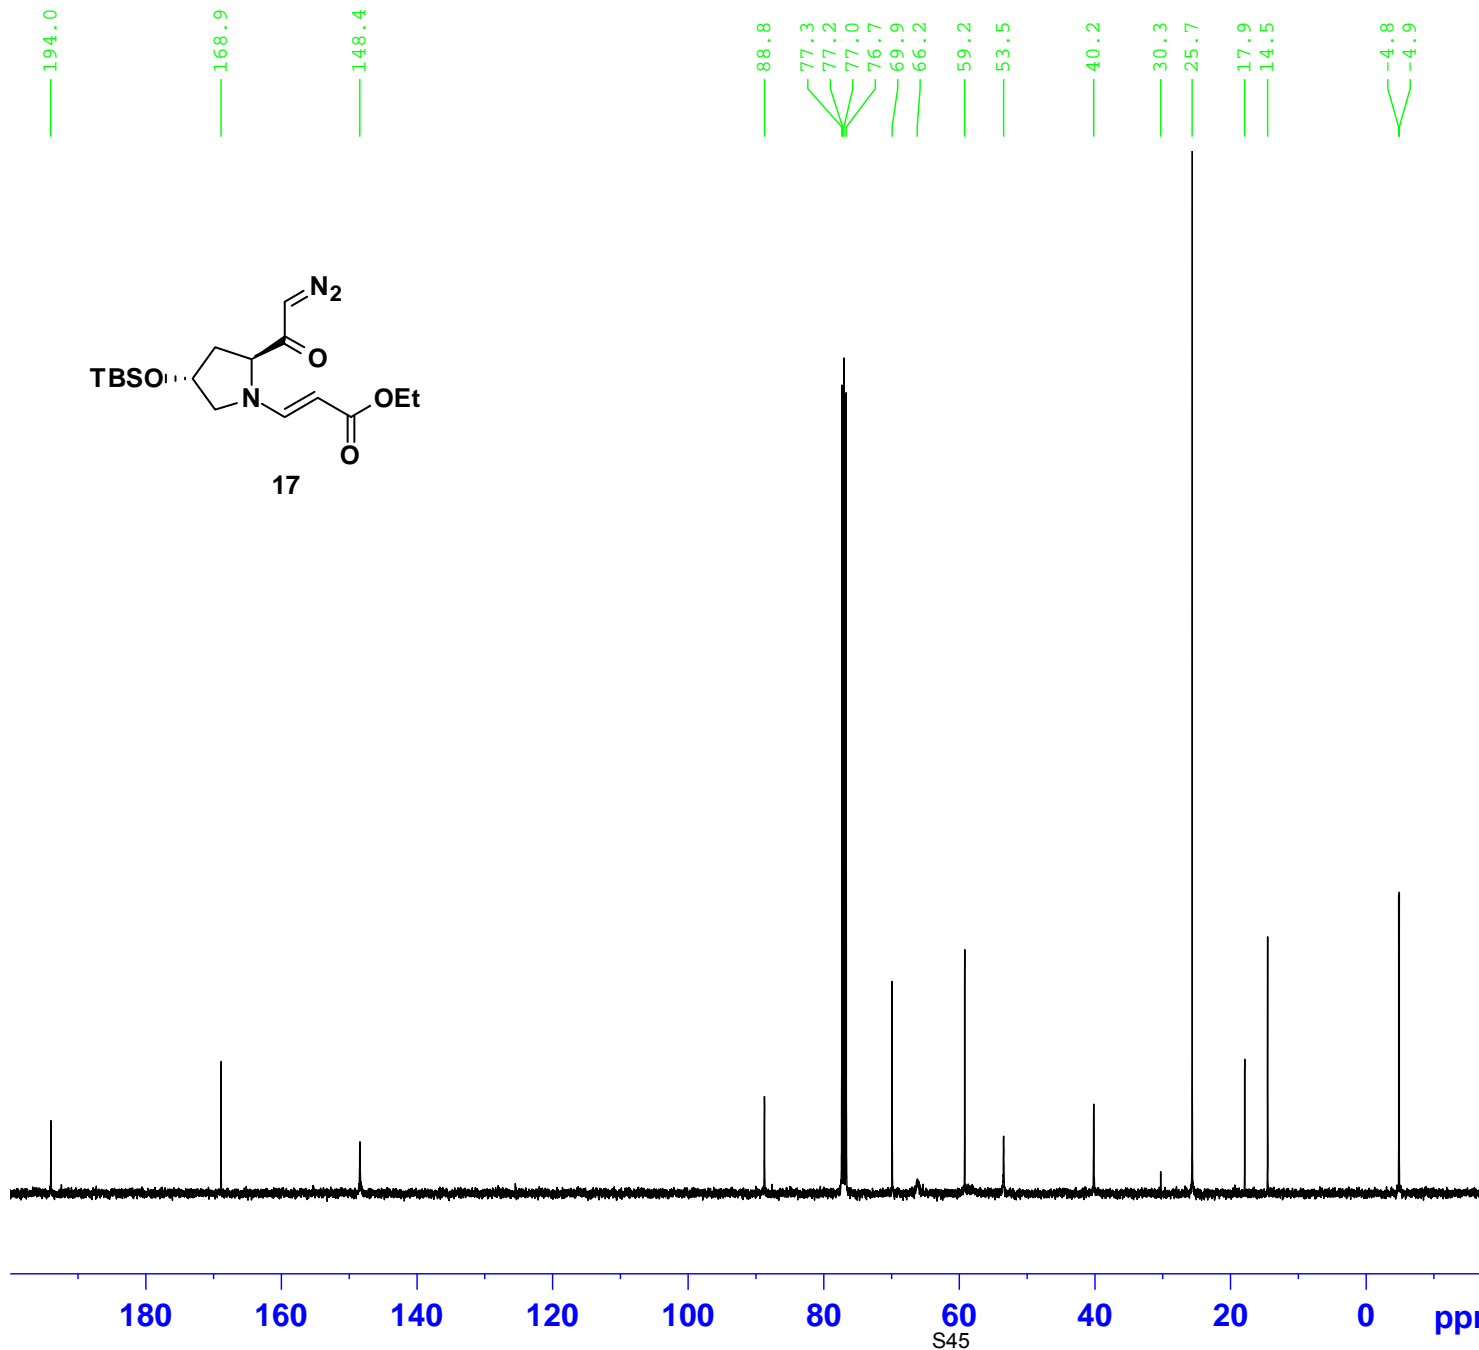

Current Data Parameters  
NAME 090512  
EXPNO 12  
PROCNO 1

F2 - Acquisition Parameters  
Date\_ 20090513  
Time 6.24  
INSTRUM spect  
PROBHD 5 mm PABBO BB-  
PULPROG zgpg30  
TD 65536  
SOLVENT CDC13  
NS 1024  
DS 4  
SWH 24038.461 Hz  
FIDRES 0.366798 Hz  
AQ 1.3631988 sec  
RG 2050  
DW 20.800 usec  
DE 6.50 usec  
TE 298.0 K  
D1 2.00000000 sec  
D11 0.03000000 sec  
TD0 1

==== CHANNEL f1 =====  
NUC1 13C  
P1 10.30 usec  
PL1 -3.00 dB  
PL1W 71.16858673 W  
SFO1 100.6228298 MHz

==== CHANNEL f2 =====  
CPDPRG2 waltz16  
NUC2 1H  
PCPD2 90.00 usec  
PL2 -3.00 dB  
PL12 16.43 dB  
PL13 19.37 dB  
PL2W 18.64416504 W  
PL12W 0.21259004 W  
PL13W 0.10802962 W  
SFO2 400.1316005 MHz

F2 - Processing parameters  
SI 32768  
SF 100.6127707 MHz  
WDW EM  
SSB 0  
LB 1.00 Hz  
GB 0  
PC 1.40



Current Data Parameters  
NAME 090513  
EXPNO 20  
PROCNO 1

F2 - Acquisition Parameters  
Date\_ 20090513  
Time 18.37  
INSTRUM spect  
PROBHD 5 mm PABBO BB-  
PULPROG zg30  
TD 65536  
SOLVENT CDC13  
NS 16  
DS 2  
SWH 8223.685 Hz  
FIDRES 0.125483 Hz  
AQ 3.9846387 sec  
RG 90.5  
DW 60.800 usec  
DE 6.50 usec  
TE 298.1 K  
D1 1.00000000 sec  
TD0 1

==== CHANNEL f1 =====  
NUC1 1H  
P1 11.06 usec  
PL1 -3.00 dB  
PL1W 18.64416504 W  
SFO1 400.1324710 MHz

F2 - Processing parameters  
SI 32768  
SF 400.1300054 MHz  
WDW EM  
SSB 0  
LB 0.30 Hz  
GB 0  
PC 1.00

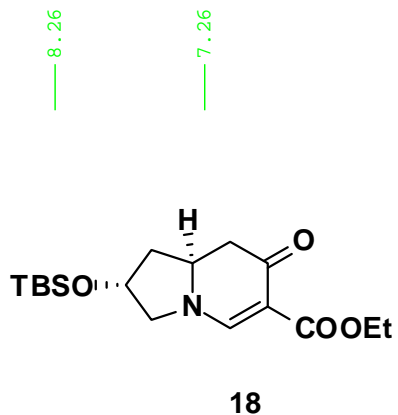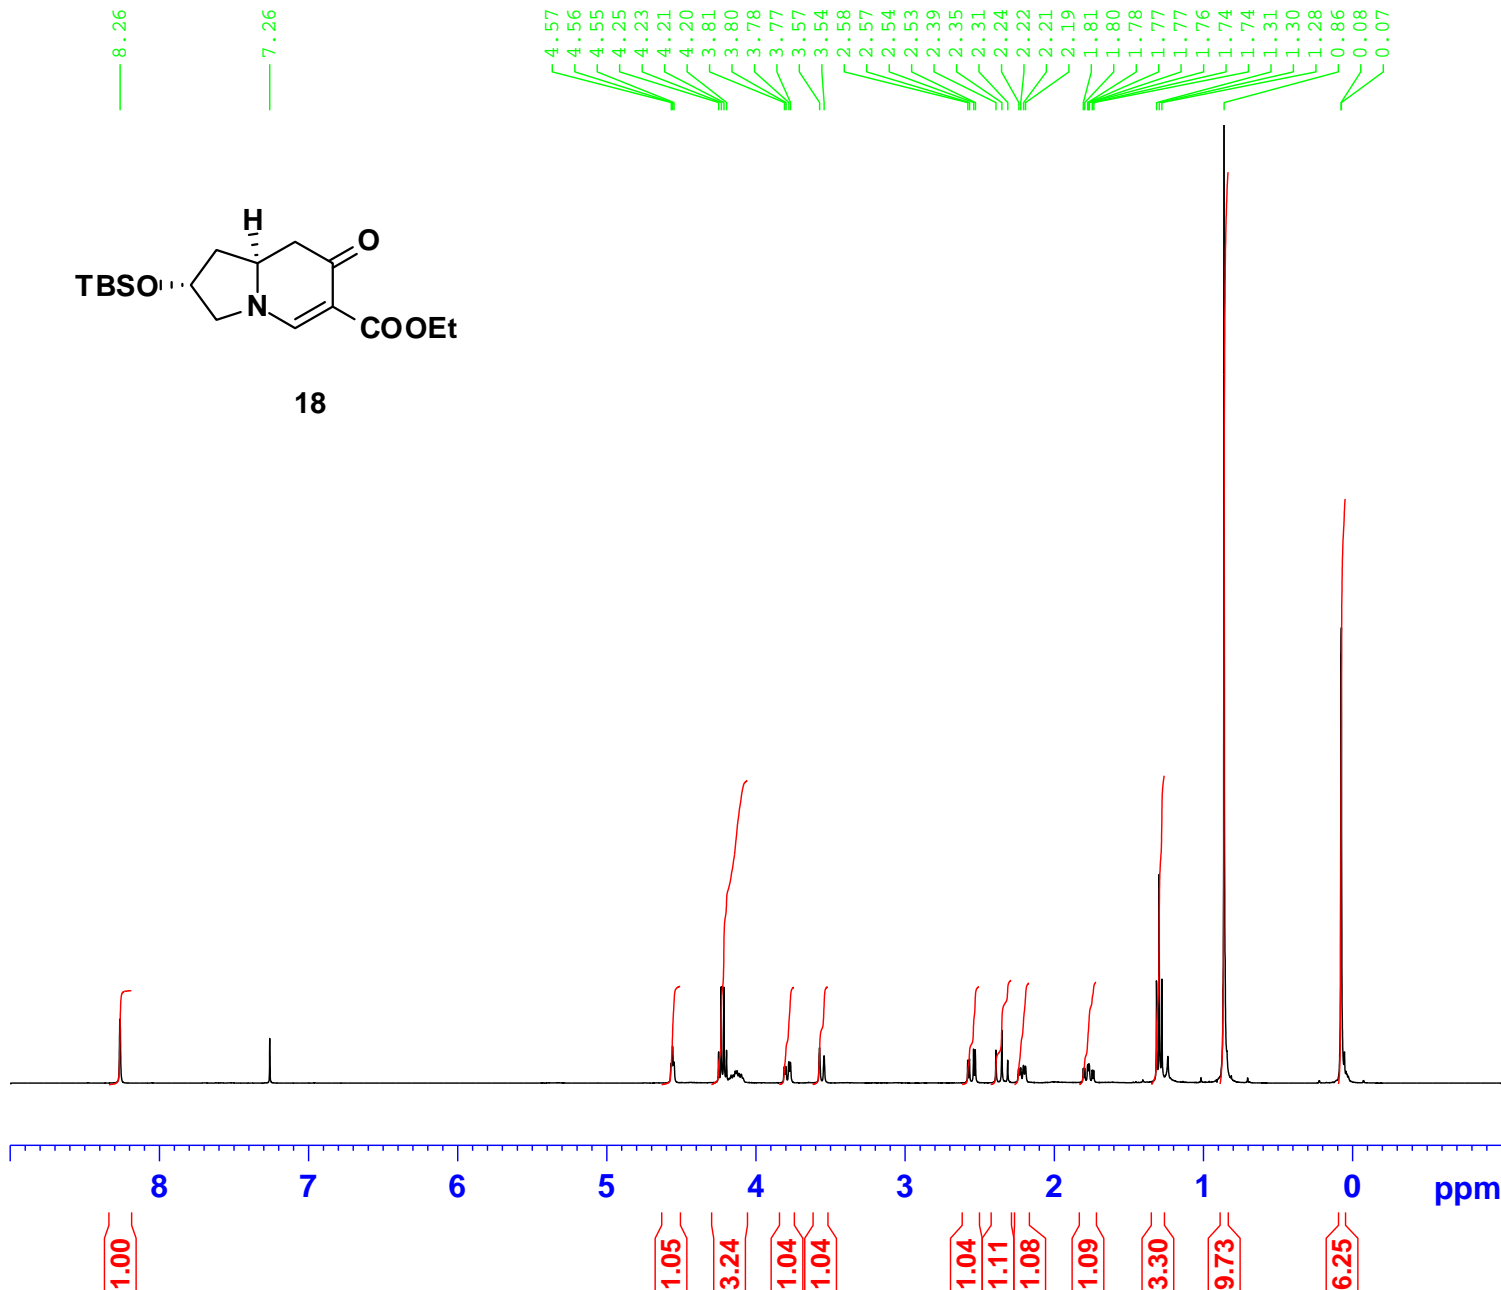

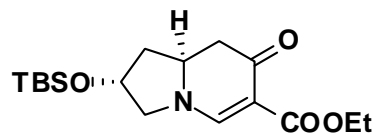

18

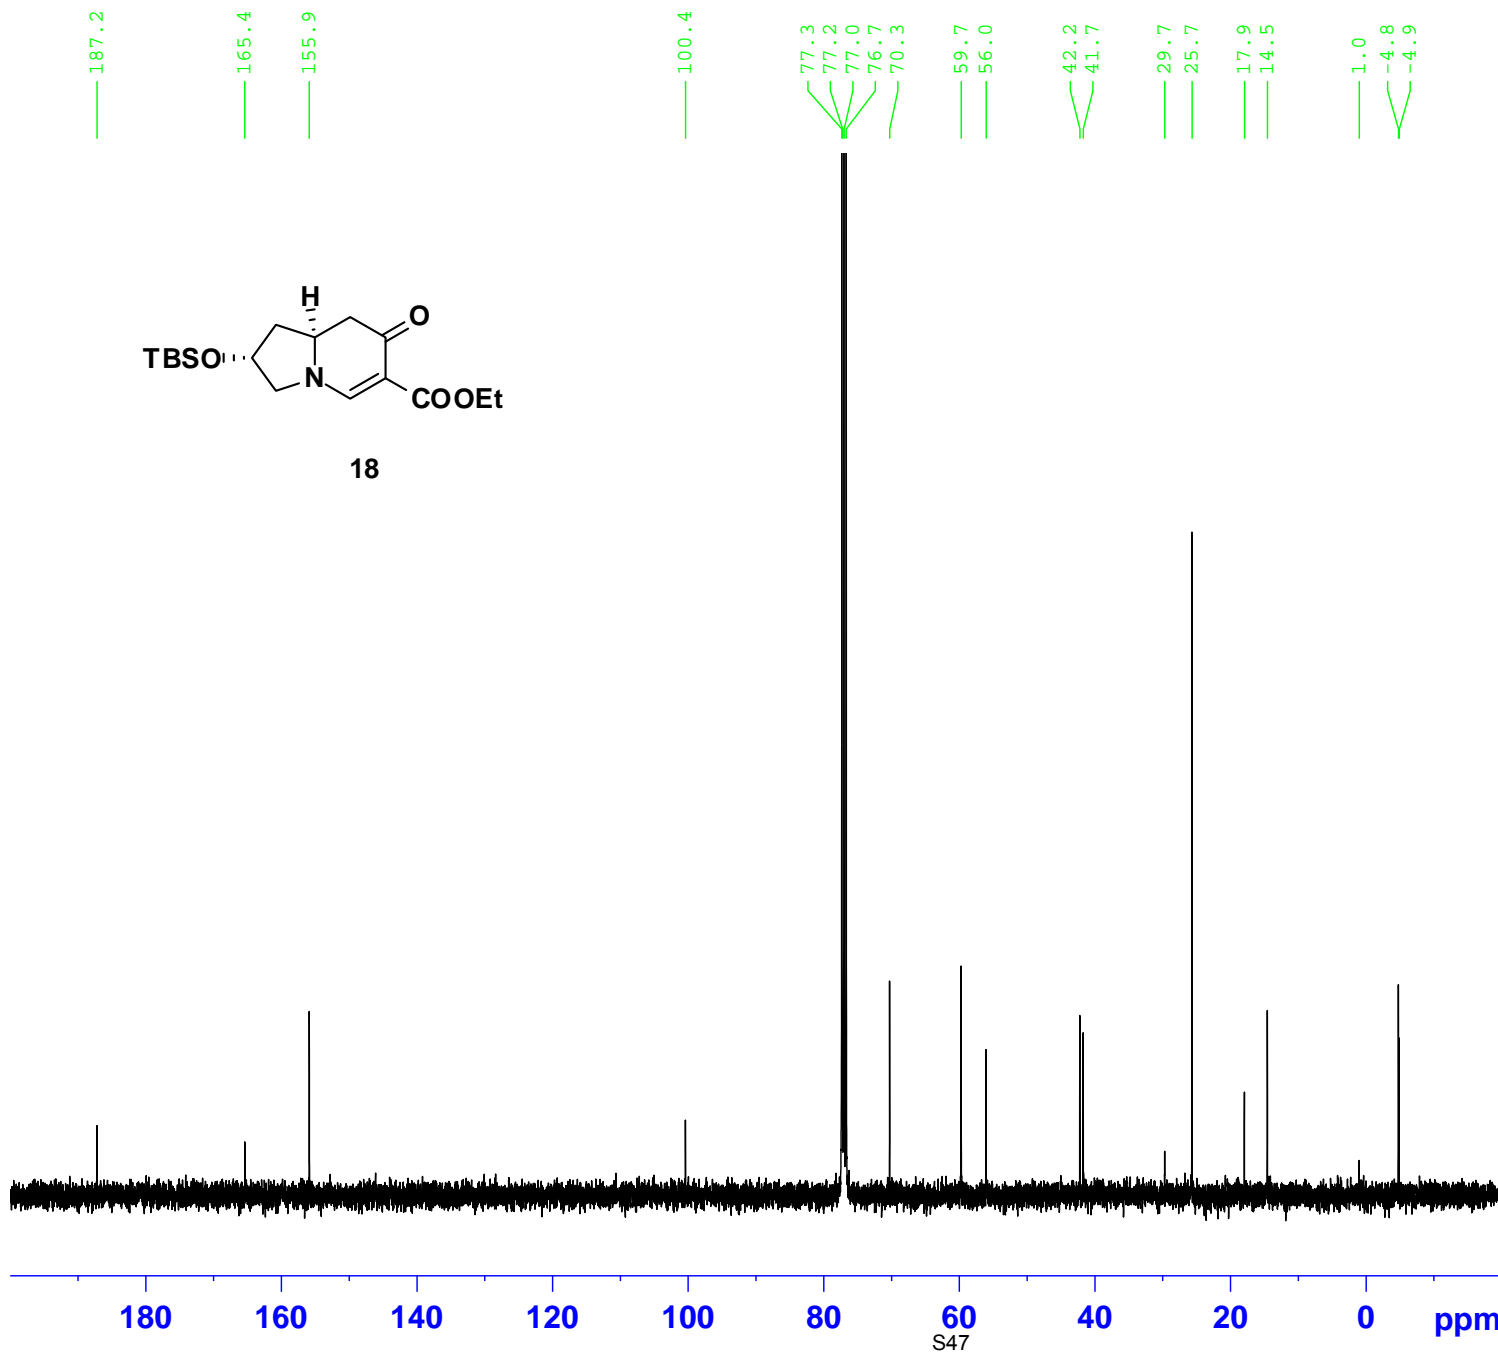

Current Data Parameters  
 NAME 090728  
 EXPNO 30  
 PROCNO 1

F2 - Acquisition Parameters  
 Date\_ 20090729  
 Time 6.27  
 INSTRUM spect  
 PROBHD 5 mm PABBO BB-  
 PULPROG zgpg30  
 TD 65536  
 SOLVENT CDC13  
 NS 1024  
 DS 4  
 SWH 24038.461 Hz  
 FIDRES 0.366798 Hz  
 AQ 1.3631988 sec  
 RG 2050  
 DW 20.800 usec  
 DE 6.50 usec  
 TE 298.0 K  
 D1 2.00000000 sec  
 D11 0.03000000 sec  
 TD0 1

==== CHANNEL f1 =====  
 NUC1 13C  
 P1 10.30 usec  
 PL1 -3.00 dB  
 PL1W 71.16858673 W  
 SFO1 100.6228298 MHz

==== CHANNEL f2 =====  
 CPDPRG2 waltz16  
 NUC2 1H  
 PCPD2 90.00 usec  
 PL2 -3.00 dB  
 PL12 16.43 dB  
 PL13 19.37 dB  
 PL2W 18.64416504 W  
 PL12W 0.21259004 W  
 PL13W 0.10802962 W  
 SFO2 400.1316005 MHz

F2 - Processing parameters  
 SI 32768  
 SF 100.6127690 MHz  
 WDW EM  
 SSB 0  
 LB 1.00 Hz  
 GB 0  
 PC 1.40

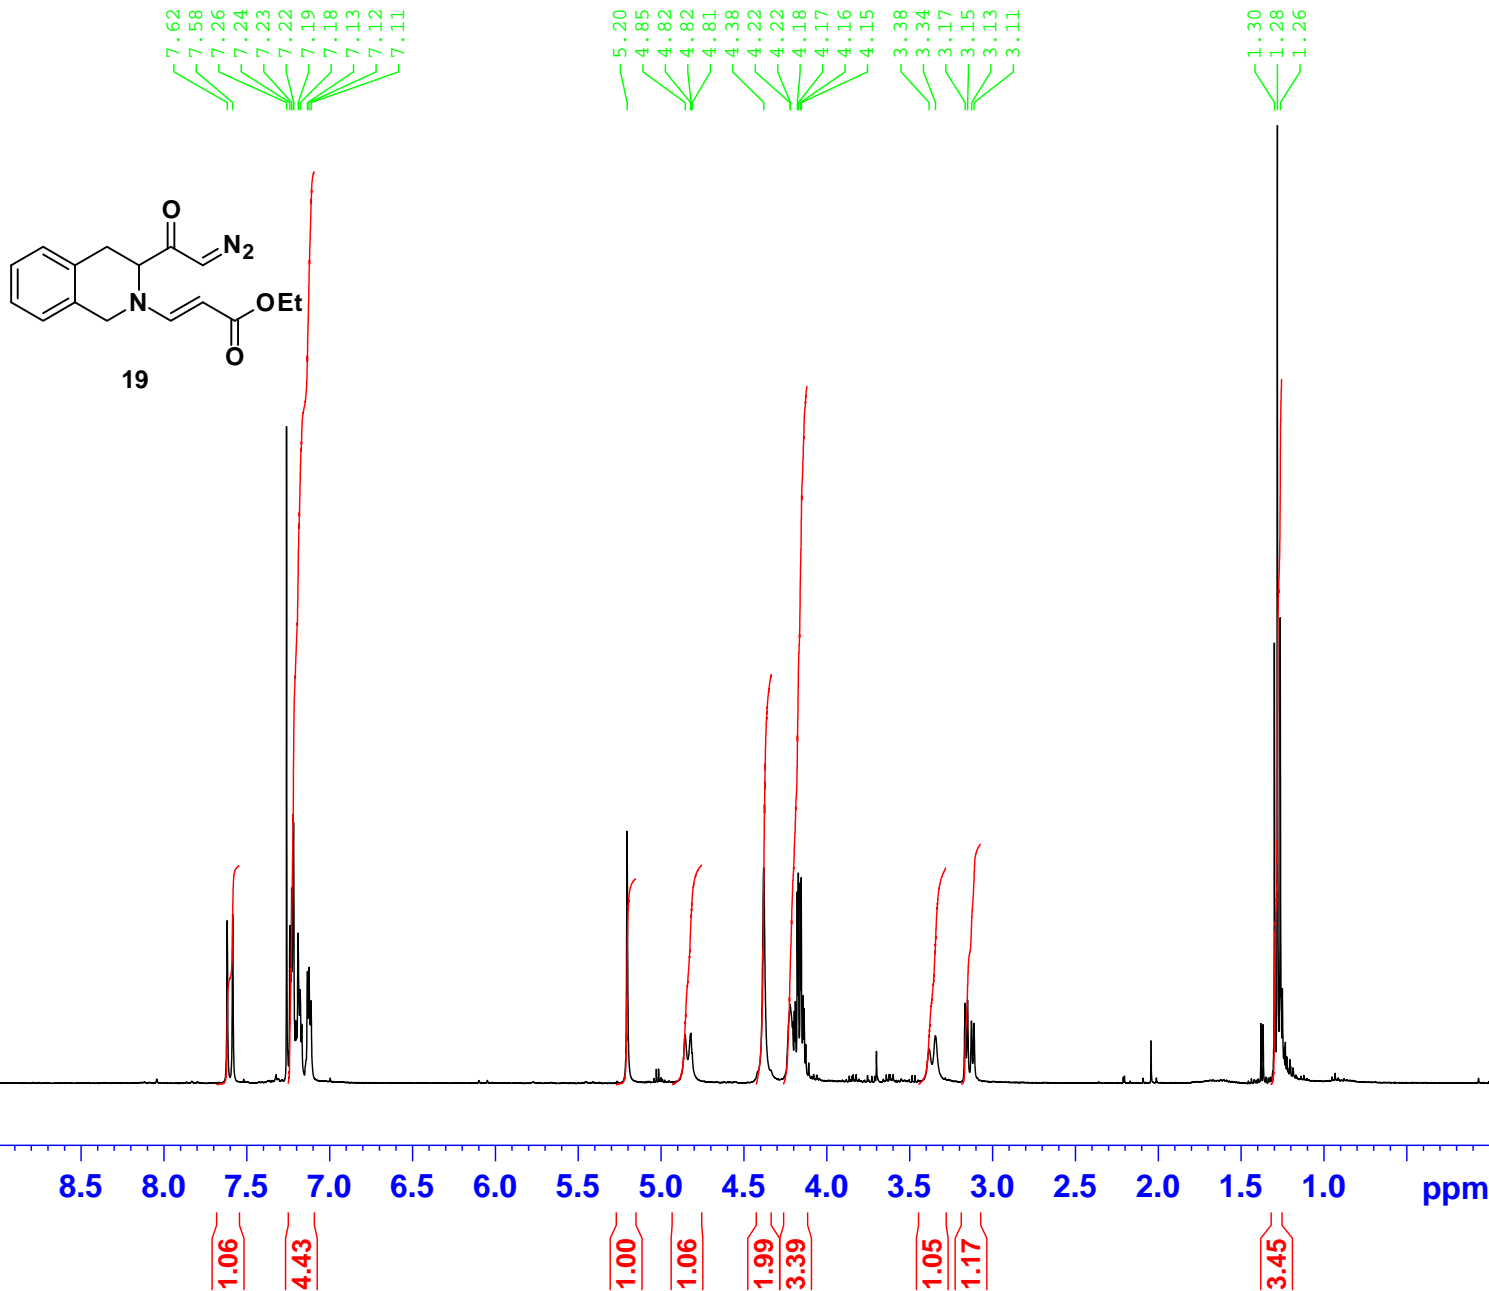

Current Data Parameters  
NAME 081121  
EXPNO 10  
PROCNO 1

F2 - Acquisition Parameters  
Date\_ 20081121  
Time 10.58  
INSTRUM spect  
PROBHD 5 mm PABBO BB-  
PULPROG zg30  
TD 65536  
SOLVENT CDC13  
NS 16  
DS 2  
SWH 8223.685 Hz  
FIDRES 0.125483 Hz  
AQ 3.9846387 sec  
RG 322  
DW 60.800 usec  
DE 6.50 usec  
TE 294.8 K  
D1 1.00000000 sec  
TD0 1

==== CHANNEL f1 =====  
NUC1 1H  
P1 9.61 usec  
PL1 -3.00 dB  
SFO1 400.1324710 MHz

F2 - Processing parameters  
SI 32768  
SF 400.1300036 MHz  
WDW EM  
SSB 0  
LB 0.30 Hz  
GB 0  
PC 1.00





Current Data Parameters  
NAME 090125  
EXPNO 22  
PROCNO 1

F2 - Acquisition Parameters  
Date\_ 20090126  
Time 6.45  
INSTRUM spect  
PROBHD 5 mm PABBO BB-  
PULPROG zgpg30  
TD 65536  
SOLVENT CDC13  
NS 2048  
DS 4  
SWH 24038.461 Hz  
FIDRES 0.366798 Hz  
AQ 1.3631988 sec  
RG 2050  
DW 20.800 usec  
DE 7.50 usec  
TE 298.0 K  
D1 2.00000000 sec  
d11 0.03000000 sec  
DELTA 1.89999998 sec  
TD0 1

==== CHANNEL f1 =====  
NUC1 13C  
P1 10.30 usec  
PL1 -3.00 dB  
SFO1 100.6228298 MHz

==== CHANNEL f2 =====  
CPDPRG2 waltz16  
NUC2 1H  
PCPD2 90.00 usec  
PL12 16.43 dB  
PL13 19.37 dB  
PL2 -3.00 dB  
SFO2 400.1316005 MHz

F2 - Processing parameters  
SI 32768  
SF 100.6127803 MHz  
WDW EM  
SSB 0  
LB 1.00 Hz  
GB 0  
PC 1.40

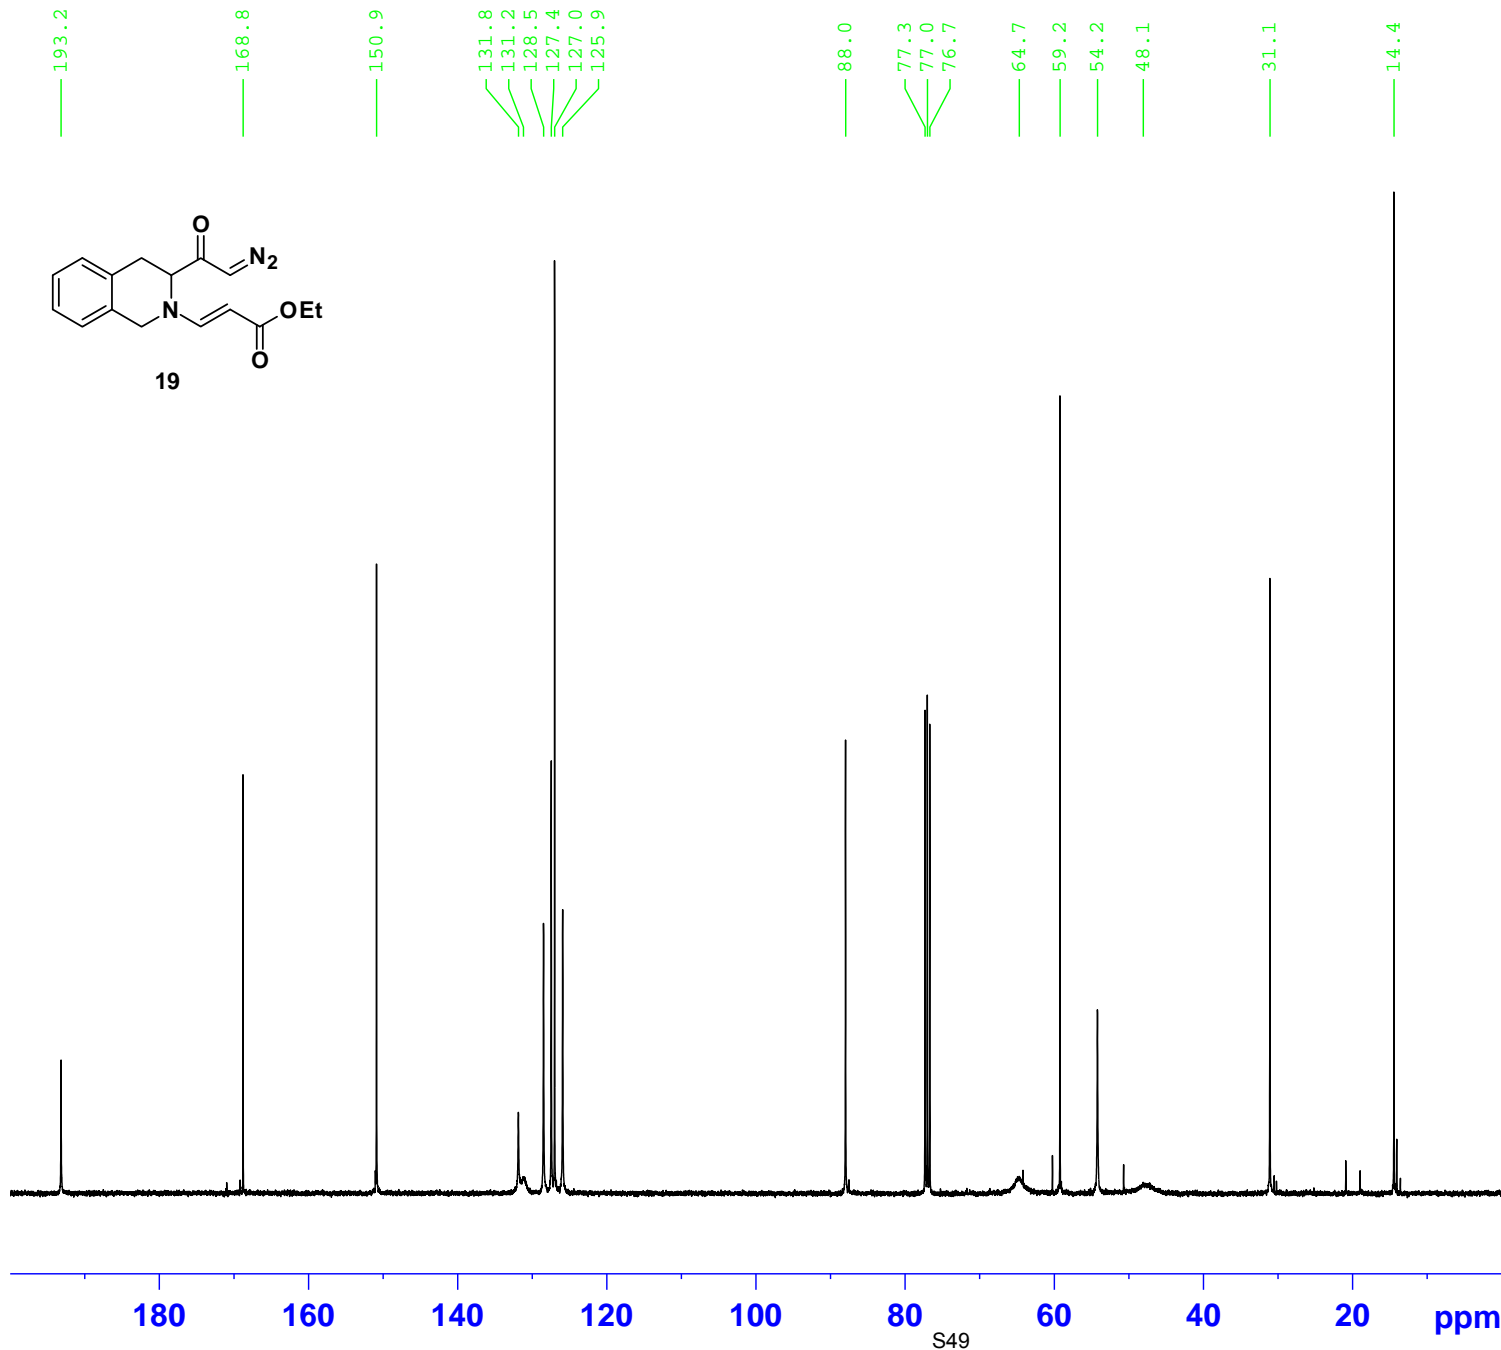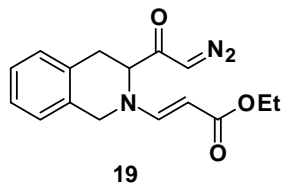



Current Data Parameters  
NAME 081123  
EXPNO 10  
PROCNO 1

F2 - Acquisition Parameters  
Date\_ 20081123  
Time 15.06  
INSTRUM spect  
PROBHD 5 mm PABBO BB-  
PULPROG zg30  
TD 65536  
SOLVENT CDC13  
NS 16  
DS 2  
SWH 8223.685 Hz  
FIDRES 0.125483 Hz  
AQ 3.9846387 sec  
RG 287  
DW 60.800 usec  
DE 6.50 usec  
TE 295.0 K  
D1 1.00000000 sec  
TD0 1

==== CHANNEL f1 =====  
NUC1 1H  
P1 9.61 usec  
PL1 -3.00 dB  
SFO1 400.1324710 MHz

F2 - Processing parameters  
SI 32768  
SF 400.1300031 MHz  
WDW EM  
SSB 0  
LB 0.30 Hz  
GB 0  
PC 1.00

8.24  
7.27  
7.26  
7.25  
7.19  
7.18  
7.17  
7.15  
7.13  
7.12

4.80  
4.76  
4.69  
4.65  
4.26  
4.25  
4.23  
4.21  
3.93  
3.92  
3.91  
3.90  
3.89  
3.15  
3.12  
3.11  
3.08  
2.85  
2.84  
2.83  
2.81  
2.80  
2.60  
2.58  
2.56  
2.54  
1.33  
1.31  
1.29  
1.25

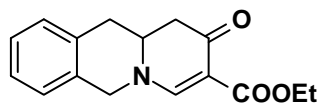

20

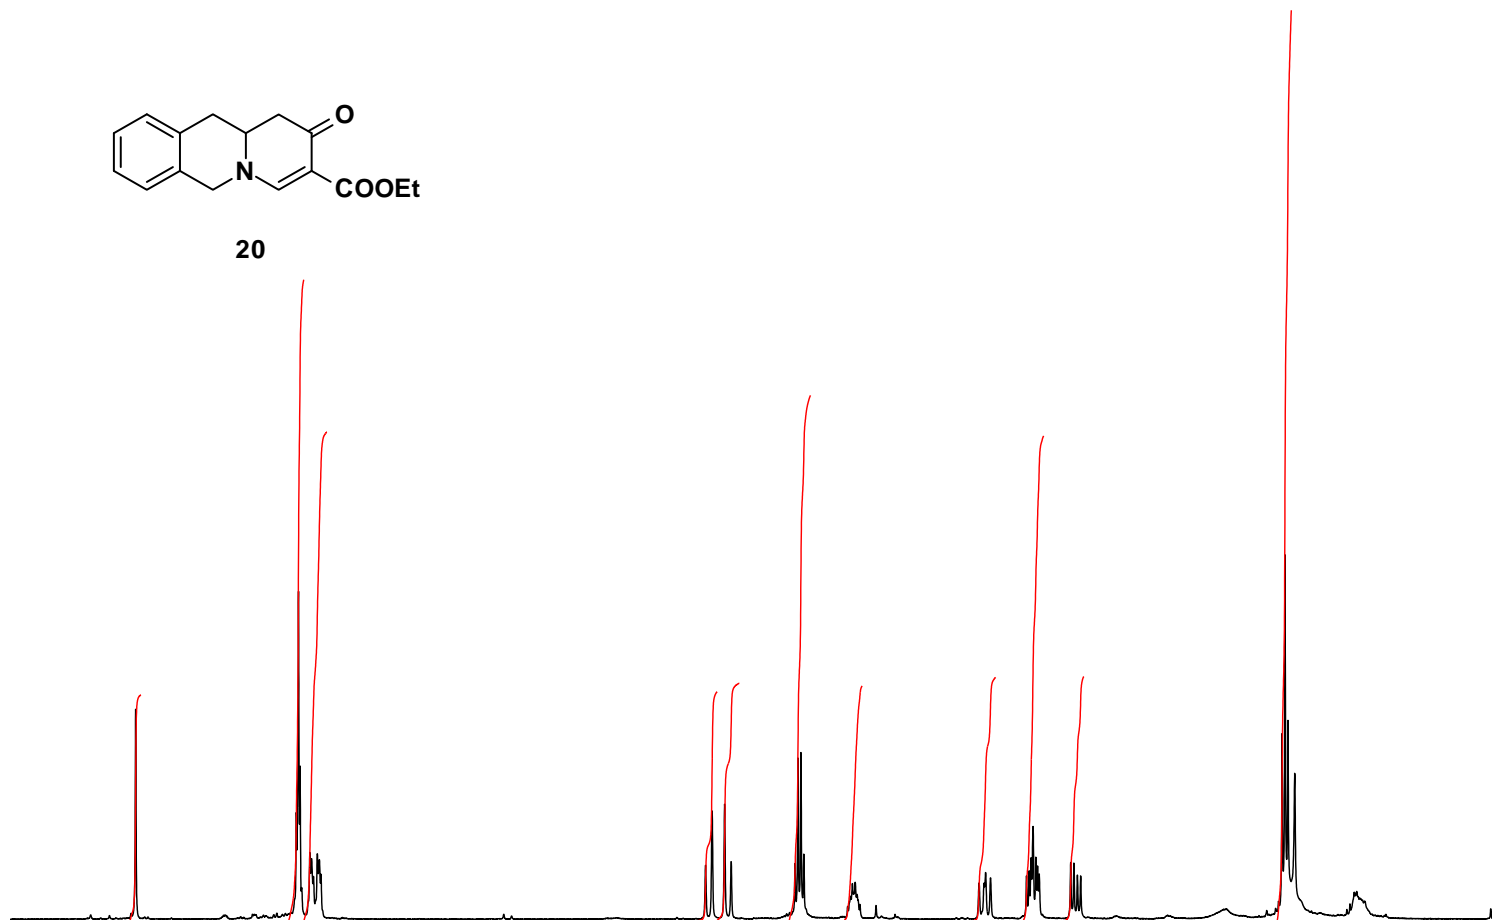

8.5 8.0 7.5 7.0 6.5 6.0 5.5 5.0 4.5 4.0 3.5 3.0 2.5 2.0 1.5 1.0 ppm

1.00

2.84  
2.17

1.02  
1.05

2.33  
1.04

1.08  
2.15  
1.08

4.05

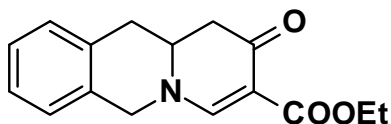

20

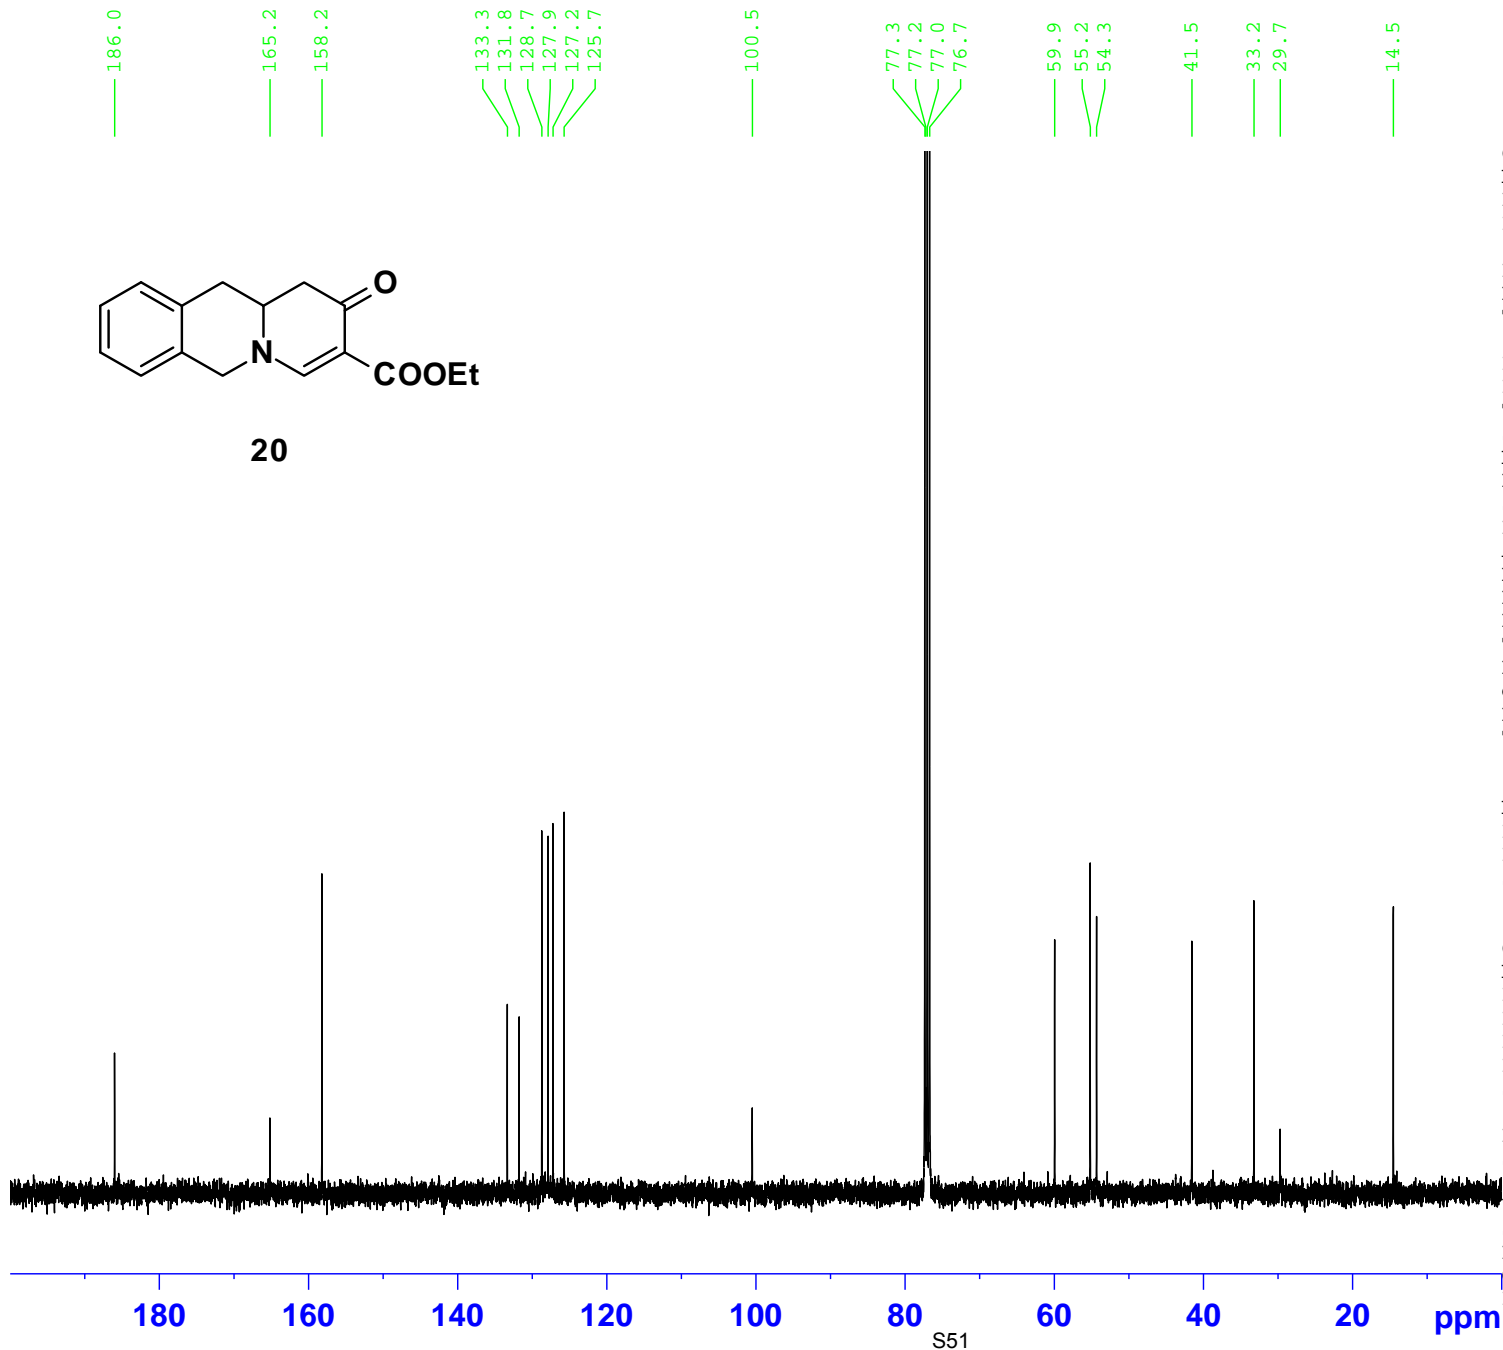

Current Data Parameters  
NAME 081123  
EXPNO 13  
PROCNO 1

F2 - Acquisition Parameters  
Date\_ 20081123  
Time 23.18  
INSTRUM spect  
PROBHD 5 mm PABBO BB-  
PULPROG zgpg30  
TD 65536  
SOLVENT CDC13  
NS 1024  
DS 4  
SWH 24038.461 Hz  
FIDRES 0.366798 Hz  
AQ 1.3631988 sec  
RG 45.2  
DW 20.800 usec  
DE 7.50 usec  
TE 295.2 K  
D1 2.00000000 sec  
d11 0.03000000 sec  
DELTA 1.89999998 sec  
TD0 1

==== CHANNEL f1 =====  
NUC1 13C  
P1 10.30 usec  
PL1 -3.00 dB  
SFO1 100.6228298 MHz

==== CHANNEL f2 =====  
CPDPRG2 waltz16  
NUC2 1H  
PCPD2 90.00 usec  
PL12 16.43 dB  
PL13 19.37 dB  
PL2 -3.00 dB  
SFO2 400.1316005 MHz

F2 - Processing parameters  
SI 32768  
SF 100.6127690 MHz  
WDF EM  
SSB 0  
LB 1.00 Hz  
GB 0  
PC 1.40

7.67  
7.66  
7.66  
7.65  
7.44  
7.43  
7.42  
7.26

4.12  
4.11  
4.09  
4.07  
3.65  
3.55  
3.51  
3.48  
3.43  
2.86  
2.85  
2.83  
2.81  
2.80  
2.35  
2.30  
2.29  
2.29  
2.26  
2.24  
2.09  
2.07  
2.04  
2.02  
1.74  
1.69  
1.67  
1.66  
1.64  
1.62  
1.61  
1.59  
1.49  
1.47  
1.45  
1.44  
1.42

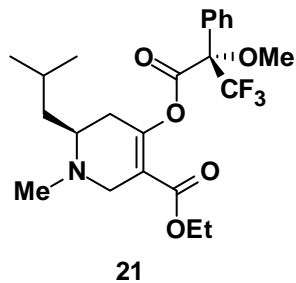

Current Data Parameters  
 NAME 090707  
 EXPNO 10  
 PROCNO 1

F2 - Acquisition Parameters  
 Date\_ 20090707  
 Time 21.23  
 INSTRUM spect  
 PROBHD 5 mm PABBO BB-  
 PULPROG zg30  
 TD 65536  
 SOLVENT CDC13  
 NS 16  
 DS 2  
 SWH 8223.685 Hz  
 FIDRES 0.125483 Hz  
 AQ 3.9846387 sec  
 RG 181  
 DW 60.800 usec  
 DE 6.50 usec  
 TE 298.1 K  
 D1 1.00000000 sec  
 TD0 1

==== CHANNEL f1 =====  
 NUC1 1H  
 P1 11.06 usec  
 PL1 -3.00 dB  
 PL1W 18.64416504 W  
 SFO1 400.1324710 MHz

F2 - Processing parameters  
 SI 32768  
 SF 400.1300051 MHz  
 WDW EM  
 SSB 0  
 LB 0.30 Hz  
 GB 0  
 PC 1.00

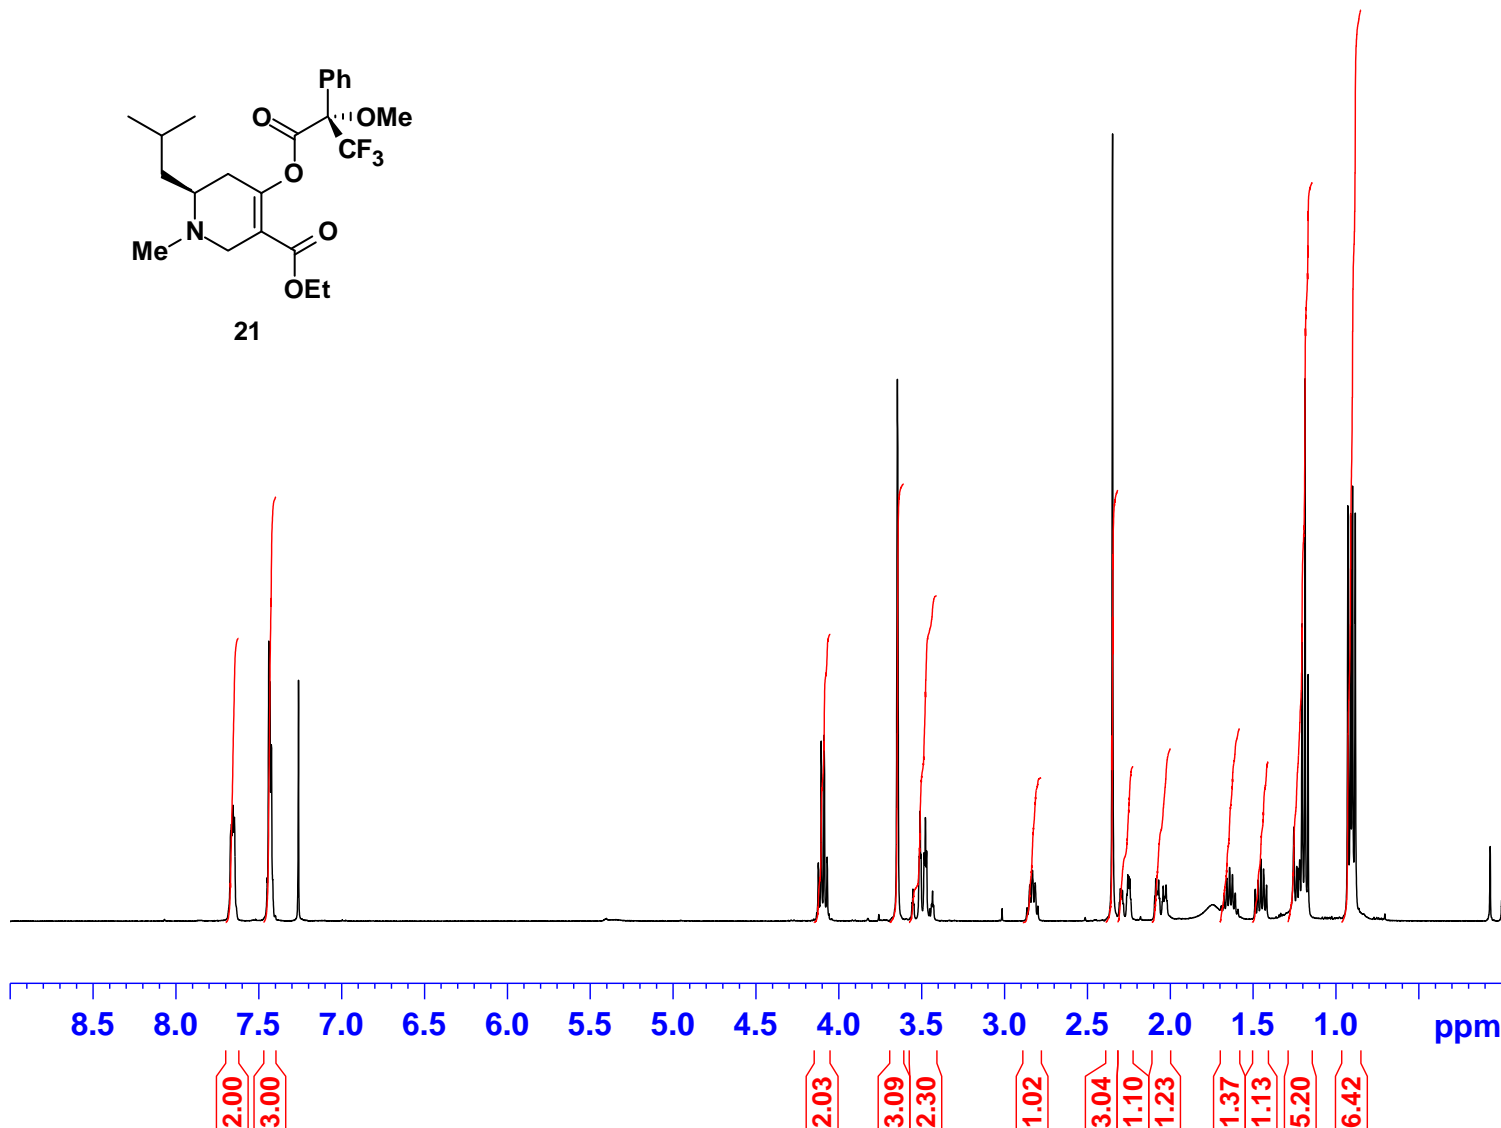



Current Data Parameters  
NAME 090708  
EXPNO 10  
PROCNO 1

F2 - Acquisition Parameters  
Date\_ 20090708  
Time 9.44  
INSTRUM spect  
PROBHD 5 mm PABBO BB-  
PULPROG zgpg30  
TD 65536  
SOLVENT CDC13  
NS 512  
DS 2  
SWH 24038.461 Hz  
FIDRES 0.366798 Hz  
AQ 1.3631988 sec  
RG 2050  
DW 20.800 usec  
DE 6.50 usec  
TE 298.0 K  
D1 2.00000000 sec  
D11 0.03000000 sec  
TD0 1

==== CHANNEL f1 =====  
NUC1 13C  
P1 10.30 usec  
PL1 -3.00 dB  
PL1W 71.16858673 W  
SFO1 100.6228298 MHz

==== CHANNEL f2 =====  
CPDPRG2 waltz16  
NUC2 1H  
PCPD2 90.00 usec  
PL2 -3.00 dB  
PL12 16.43 dB  
PL13 19.37 dB  
PL2W 18.64416504 W  
PL12W 0.21259004 W  
PL13W 0.10802962 W  
SFO2 400.1316005 MHz

F2 - Processing parameters  
SI 32768  
SF 100.6127690 MHz  
WDW EM  
SSB 0  
LB 1.00 Hz  
GB 0  
PC 1.40

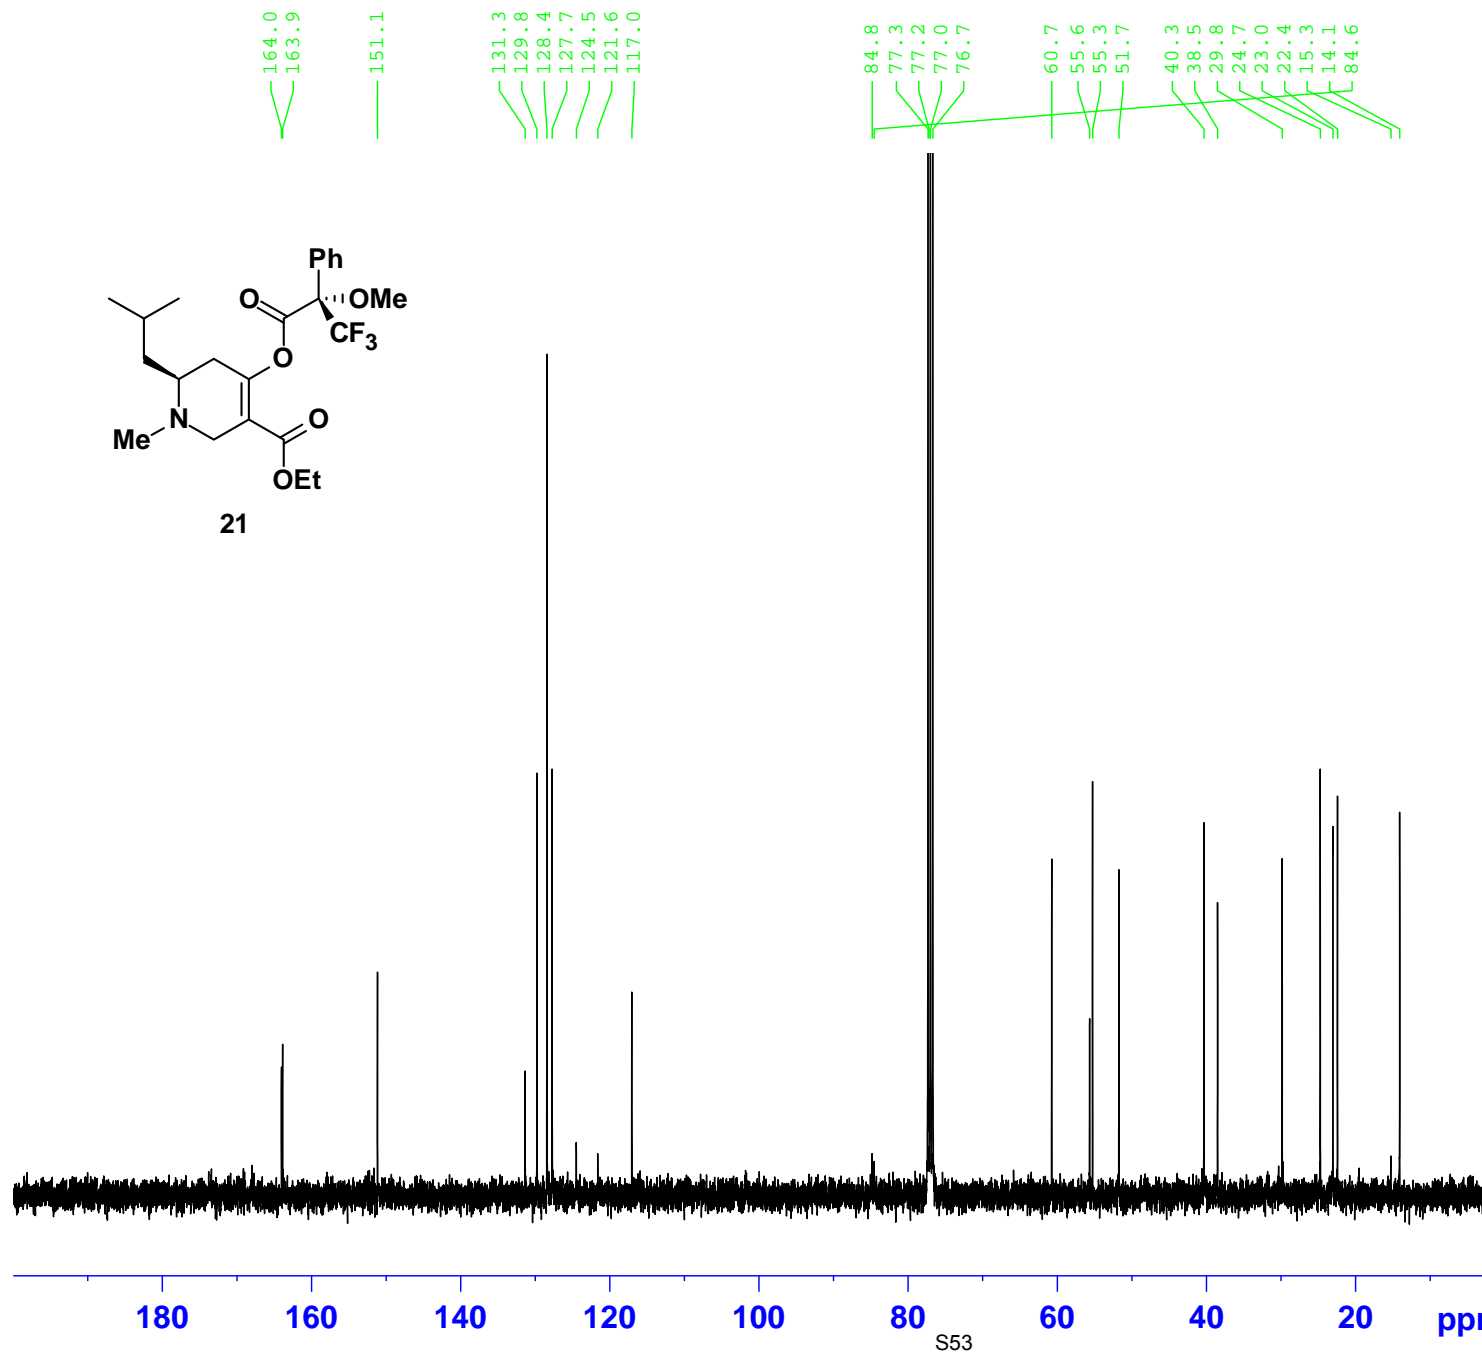

<sup>19</sup>F NMR

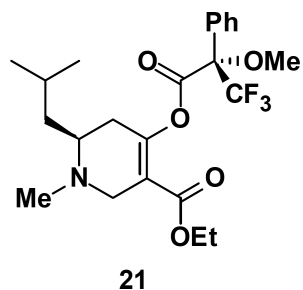

Current Data Parameters  
NAME 090708  
EXPNO 31  
PROCNO 999

F2 - Acquisition Parameters  
Date\_ 20090708  
Time 14.06  
INSTRUM spect  
PROBHD 5 mm PABBO BB-  
PULPROG zgflqn  
TD 131072  
SOLVENT CDC13  
NS 16  
DS 4  
SWH 89285.711 Hz  
FIDRES 0.681196 Hz  
AQ 0.7340532 sec  
RG 1030  
DW 5.600 usec  
DE 6.50 usec  
TE 298.1 K  
D1 1.00000000 sec  
TD0 1

===== CHANNEL f1 =====  
NUC1 19F  
P1 11.00 usec  
PL1 -4.00 dB  
PL1W 26.81568718 W  
SF01 376.4607164 MHz

F2 - Processing parameters  
SI 65536  
SF 376.4983660 MHz  
WDW EM  
SSB 0  
LB 0.30 Hz  
GB 0  
PC 1.00

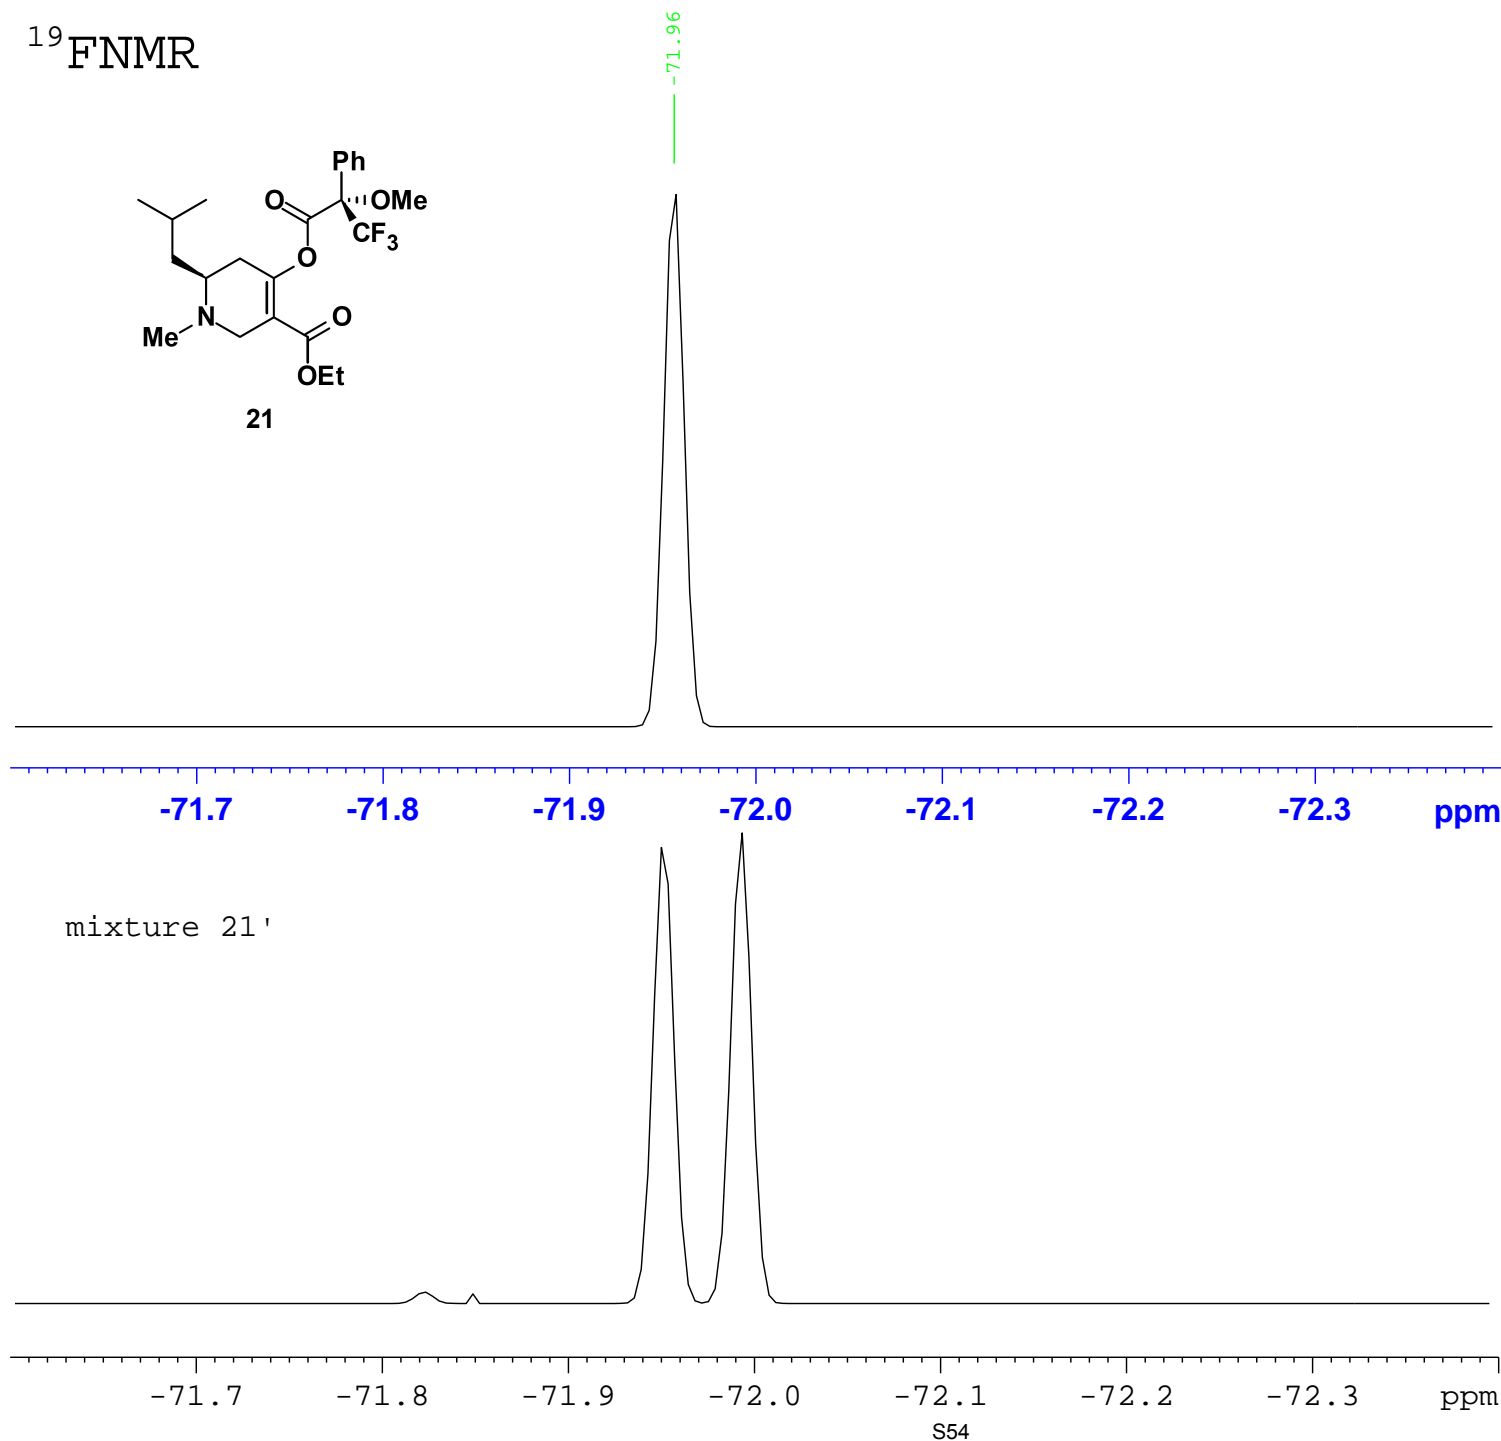

mixture 21'

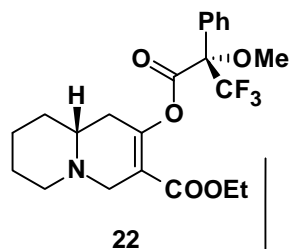

7.64  
7.63  
7.62  
7.44  
7.44  
7.43  
7.26

4.11  
4.09  
4.08  
3.70  
3.66  
3.63  
3.05  
3.02  
3.02  
3.01  
2.97  
2.28  
2.24  
2.21  
2.19  
2.12  
2.09  
2.07  
1.72  
1.26  
1.23  
1.19  
1.17  
1.16

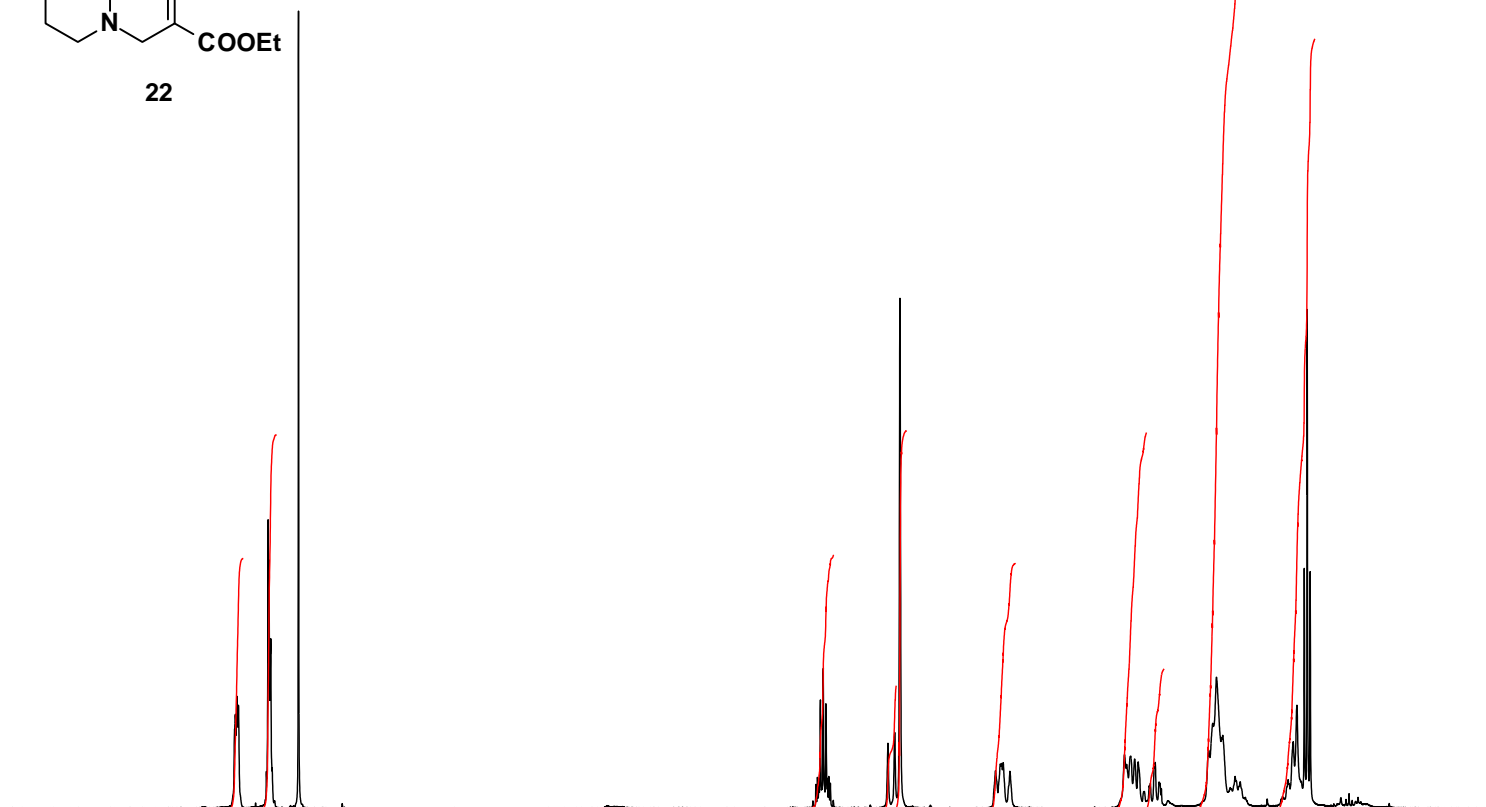

2.00  
2.99

2.03  
0.99  
3.02

1.96

3.00  
1.12

7.27  
6.14

Current Data Parameters  
NAME 090614  
EXPNO 40  
PROCNO 1

F2 - Acquisition Parameters  
Date\_ 20090614  
Time 18.34  
INSTRUM spect  
PROBHD 5 mm PABBO BB-  
PULPROG zg30  
TD 65536  
SOLVENT CDC13  
NS 16  
DS 2  
SWH 8223.685 Hz  
FIDRES 0.125483 Hz  
AQ 3.9846387 sec  
RG 322  
DW 60.800 usec  
DE 6.50 usec  
TE 273.7 K  
D1 1.00000000 sec  
TD0 1

==== CHANNEL f1 =====  
NUC1 1H  
P1 11.06 usec  
PL1 -3.00 dB  
PL1W 18.64416504 W  
SF01 400.1324710 MHz

F2 - Processing parameters  
SI 32768  
SF 400.1300058 MHz  
WDW EM  
SSB 0  
LB 0.30 Hz  
GB 0  
PC 1.00



Current Data Parameters  
NAME 090830  
EXPNO 10  
PROCNO 1

F2 - Acquisition Parameters  
Date\_ 20090731  
Time 1.09  
INSTRUM spect  
PROBHD 5 mm PABBO BB-  
PULPROG zgpg30  
TD 65536  
SOLVENT CDC13  
NS 1024  
DS 4  
SWH 24038.461 Hz  
FIDRES 0.366798 Hz  
AQ 1.3631988 sec  
RG 2050  
DW 20.800 usec  
DE 6.50 usec  
TE 298.0 K  
D1 3.0000000 sec  
D11 0.03000000 sec  
TD0 1

==== CHANNEL f1 =====  
NUC1 13C  
P1 10.30 usec  
PL1 -3.00 dB  
PL1W 71.16858673 W  
SFO1 100.6228298 MHz

==== CHANNEL f2 =====  
CPDPRG2 waltz16  
NUC2 1H  
PCPD2 90.00 usec  
PL2 -3.00 dB  
PL12 16.43 dB  
PL13 19.37 dB  
PL2W 18.64416504 W  
PL12W 0.21259004 W  
PL13W 0.10802962 W  
SFO2 400.1316005 MHz

F2 - Processing parameters  
SI 32768  
SF 100.6127690 MHz  
WDW EM  
SSB 0  
LB 1.00 Hz  
GB 0  
PC 1.40

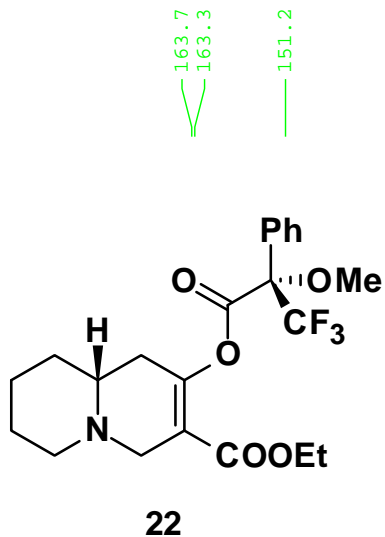

163.7  
163.3

151.2

131.3  
129.8  
128.4  
127.8  
124.5  
121.6  
117.1

77.3  
77.2  
77.0  
76.7  
60.8  
56.7  
55.6  
54.8  
54.0  
35.5  
32.7  
29.7  
25.5  
23.5  
14.1  
84.9  
84.6

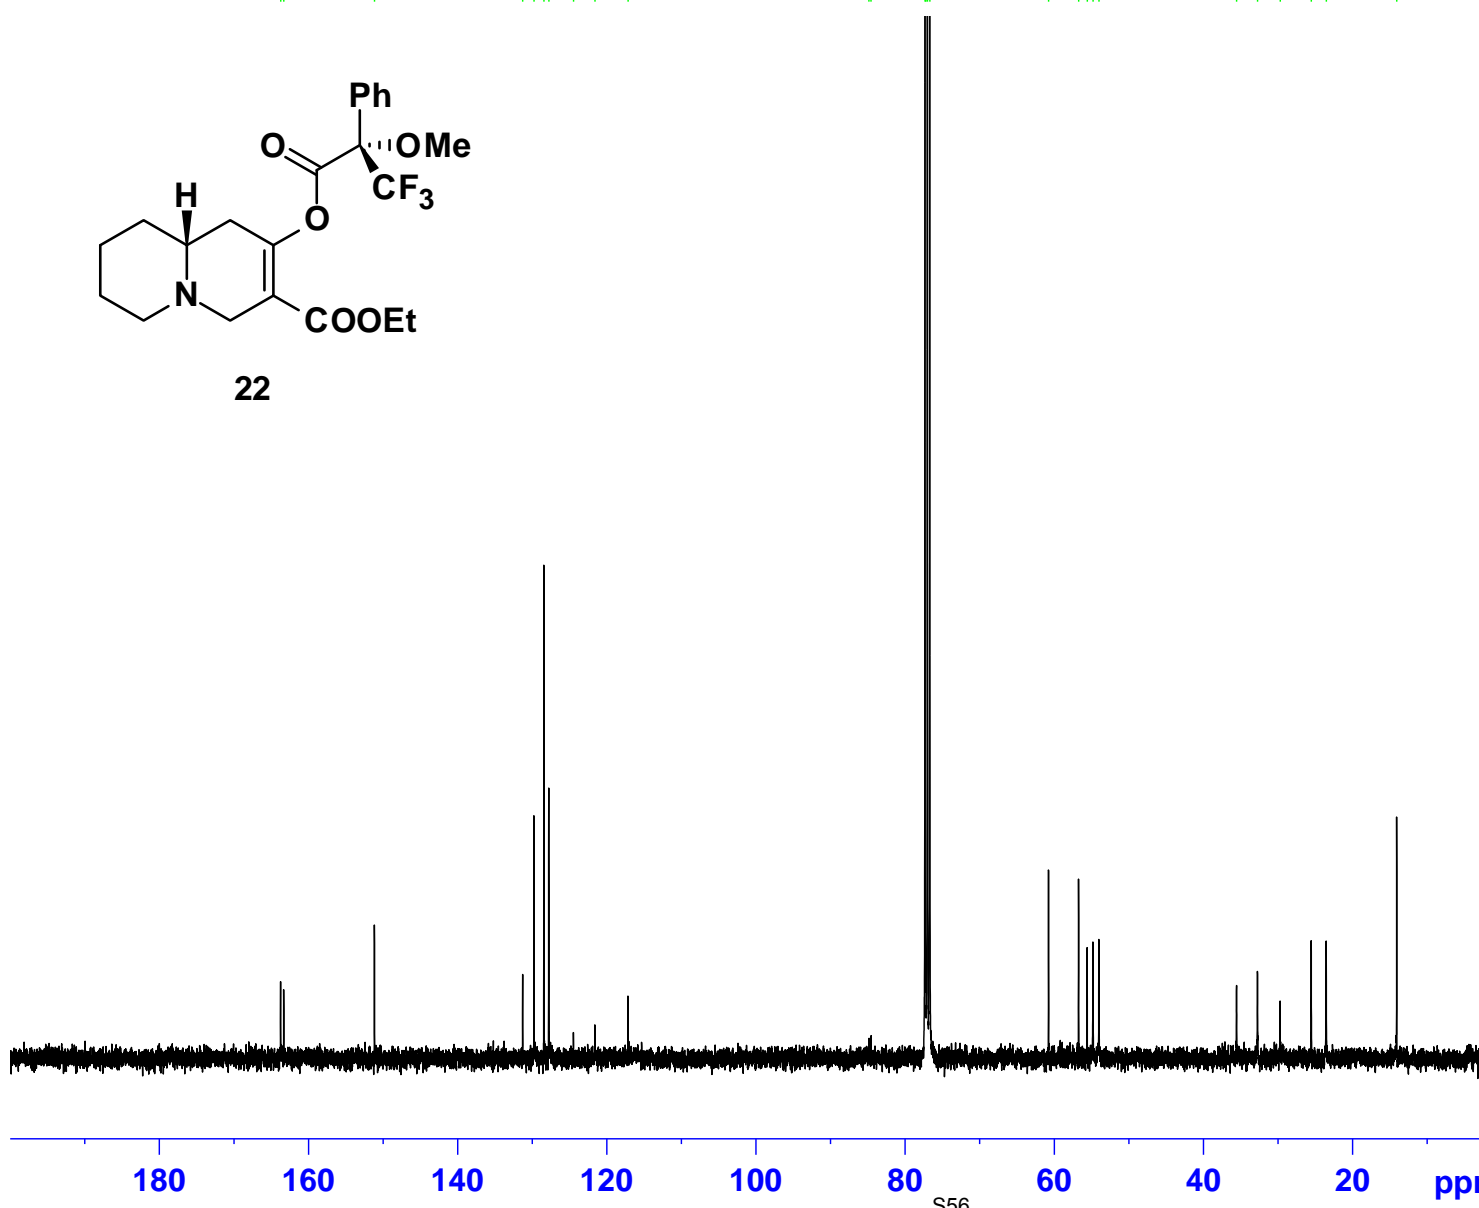



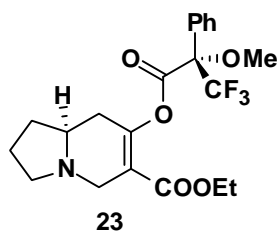

7.66  
7.66  
7.65  
7.64  
7.44  
7.44  
7.43  
7.26

4.09  
4.07  
4.05  
4.03  
3.93  
3.89  
3.63  
3.25  
3.24  
3.23  
3.22  
3.21  
3.20  
3.04  
3.03  
3.00  
2.99  
2.36  
2.28  
2.26  
2.24  
2.22  
2.02  
2.01  
1.82  
1.48  
1.23  
1.17  
1.16  
1.14

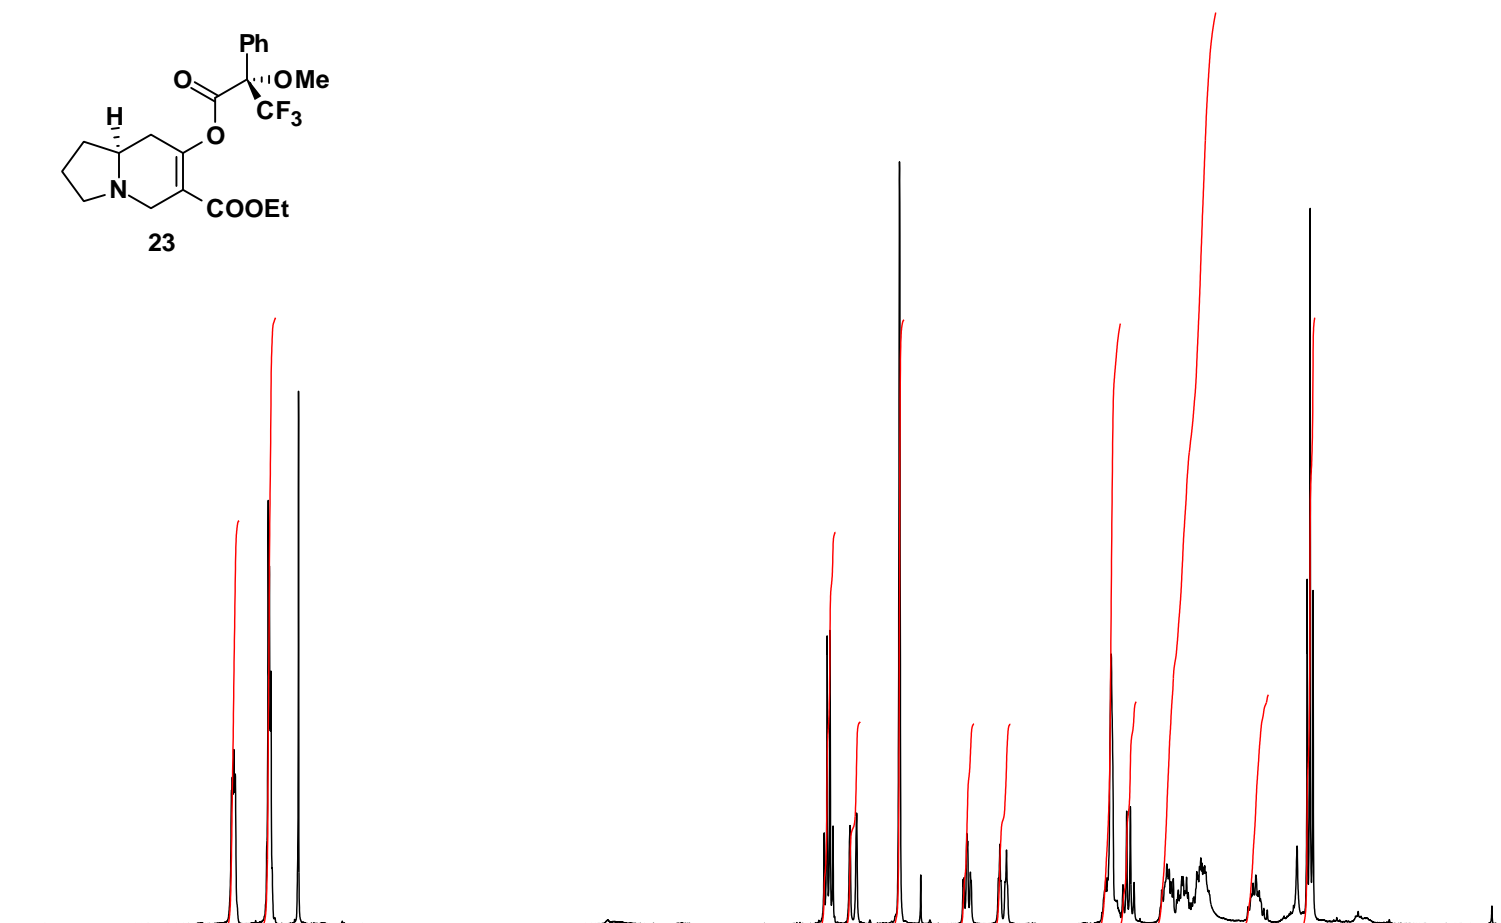

Current Data Parameters  
NAME 090612  
EXPNO 10  
PROCNO 1

F2 - Acquisition Parameters  
Date\_ 20090612  
Time 11.47  
INSTRUM spect  
PROBHD 5 mm PABBO BB-  
PULPROG zg30  
TD 65536  
SOLVENT CDC13  
NS 16  
DS 2  
SWH 8223.685 Hz  
FIDRES 0.125483 Hz  
AQ 3.9846387 sec  
RG 256  
DW 60.800 usec  
DE 6.50 usec  
TE 273.2 K  
D1 1.00000000 sec  
TD0 1

==== CHANNEL f1 =====  
NUC1 1H  
P1 11.06 usec  
PL1 -3.00 dB  
PL1W 18.64416504 W  
SF01 400.1324710 MHz

F2 - Processing parameters  
SI 32768  
SF 400.1300058 MHz  
WDW EM  
SSB 0  
LB 0.30 Hz  
GB 0  
PC 1.00

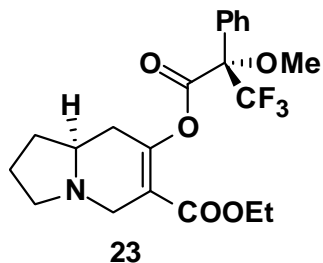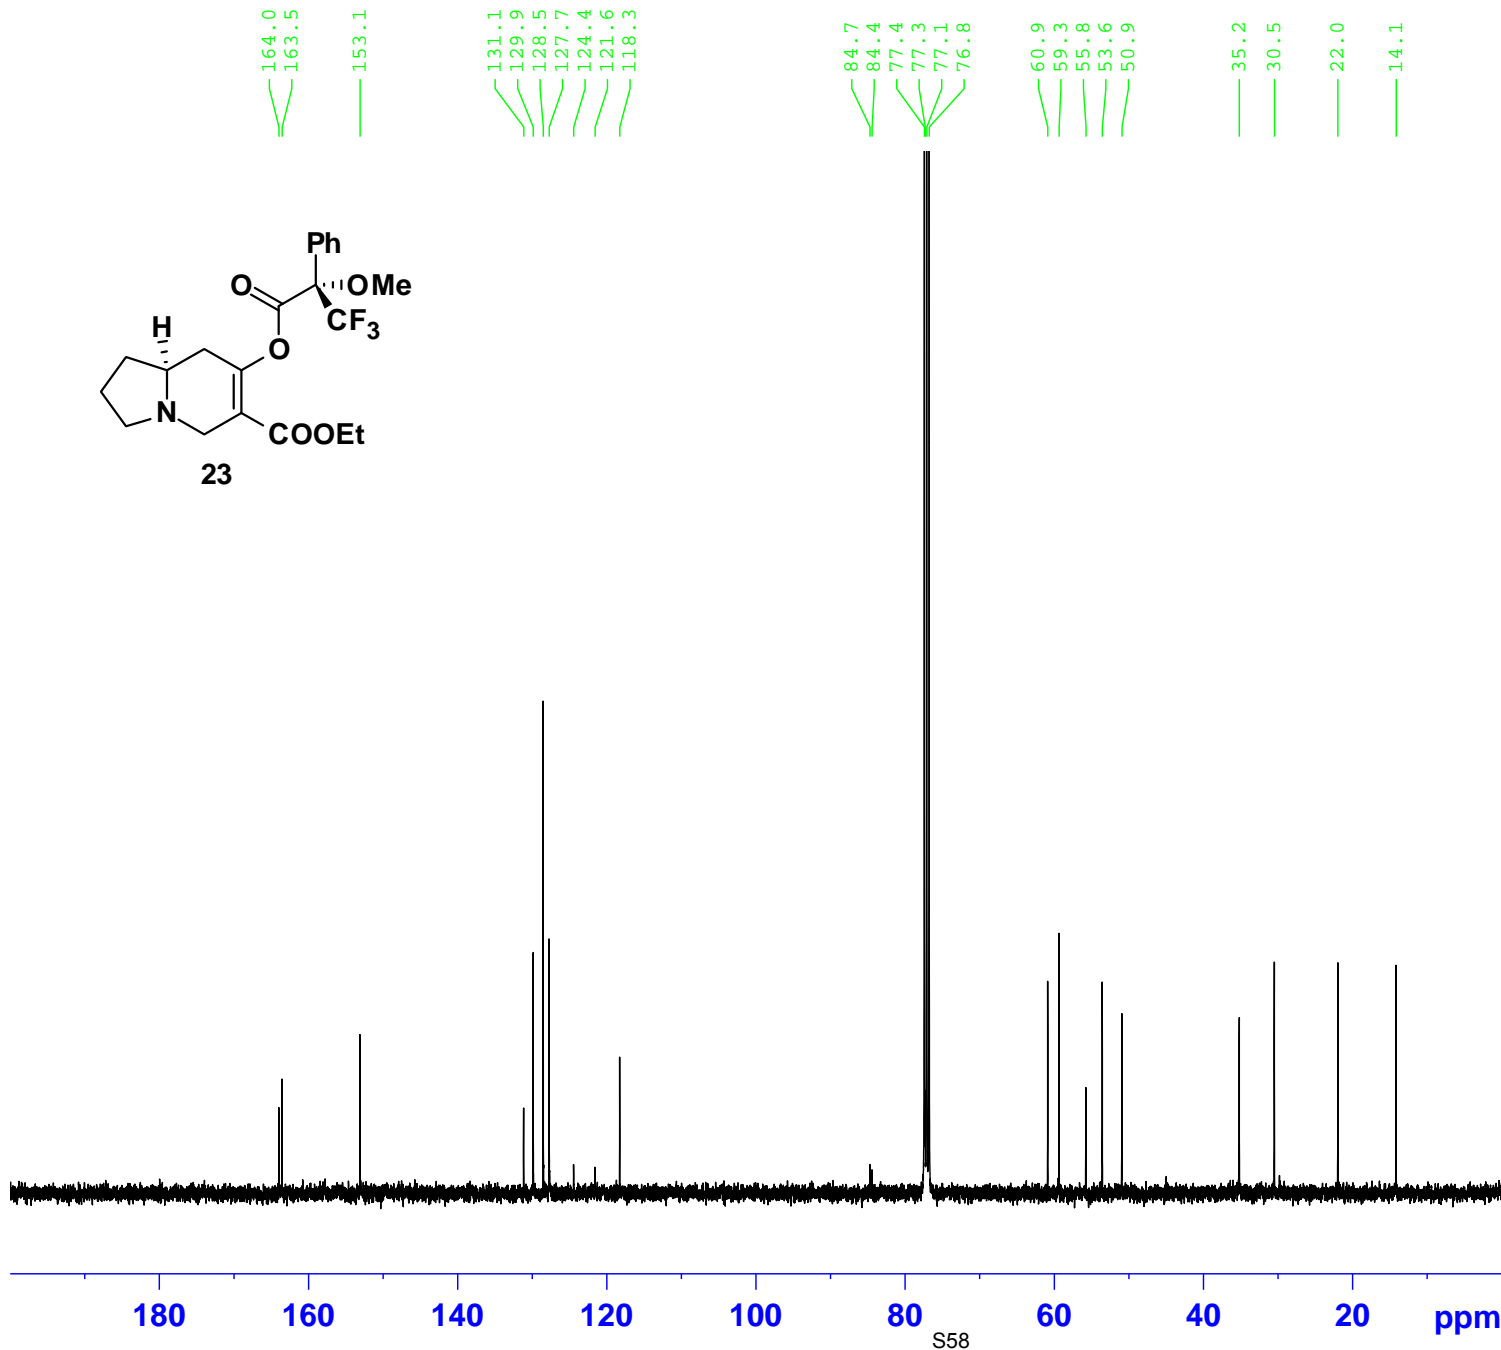

Current Data Parameters  
NAME 090612  
EXPNO 13  
PROCNO 1

F2 - Acquisition Parameters  
Date\_ 20090612  
Time 23.02  
INSTRUM spect  
PROBHD 5 mm PABBO BB-  
PULPROG zgpg30  
TD 65536  
SOLVENT CDC13  
NS 1024  
DS 4  
SWH 24038.461 Hz  
FIDRES 0.366798 Hz  
AQ 1.3631988 sec  
RG 2050  
DW 20.800 usec  
DE 6.50 usec  
TE 274.8 K  
D1 2.00000000 sec  
D11 0.03000000 sec  
TD0 1

==== CHANNEL f1 =====  
NUC1 13C  
P1 10.30 usec  
PL1 -3.00 dB  
PL1W 71.16858673 W  
SFO1 100.6228298 MHz

==== CHANNEL f2 =====  
CPDPRG2 waltz16  
NUC2 1H  
PCPD2 90.00 usec  
PL2 -3.00 dB  
PL12 16.43 dB  
PL13 19.37 dB  
PL2W 18.64416504 W  
PL12W 0.21259004 W  
PL13W 0.10802962 W  
SFO2 400.1316005 MHz

F2 - Processing parameters  
SI 32768  
SF 100.6127690 MHz  
WDW EM  
SSB 0  
LB 1.00 Hz  
GB 0  
PC 1.40
